# Supplementary material for: Non-Aufbau orbital ordering and spin density modulation in high-spin donor–acceptor conjugated polymers
Source: Royal Society of Chemistry journal article supplement (doi:10.1039/d2cp02355e), 2022-01-01
Supplement: d2cp02355e1.pdf [file d2cp02355e1.pdf]

**Electronic Supplementary Information for**

**Non-Aufbau orbital ordering and spin density**

**modulation in high-spin donor–acceptor**

**conjugated polymers**

Md Abdus Sabuj, Obinna Muoh, Md Masrul Huda, and Neeraj Rai\*

*Dave C. Swalm School of Chemical Engineering, and Center for Advanced Vehicular  
Systems, Mississippi State University, Mississippi State, MS 39762, USA.*

E-mail: [neerajrai@che.msstate.edu](mailto:neerajrai@che.msstate.edu)

Table S1: Electronic properties calculated with HF and different grids with UB3LYP, performed on a dimer ( $N = 2$ ) of CPDS-CBBT. HF calculations are performed on the UB3LYP optimized geometry. Energy values are provided in eV, and  $y_0$  is a dimensionless quantity

| Theory | Grid      | $\Delta E_{ST}$       | HOMO  | LUMO  | $E_g$ | $y_0$ | $\langle S^2 \rangle$ |
|--------|-----------|-----------------------|-------|-------|-------|-------|-----------------------|
| HF     | -         | -0.681                | -7.59 | 1.45  | 9.04  | 1.000 | 7.432                 |
| B3LYP  | Fine      | $-5.4 \times 10^{-4}$ | -4.64 | -3.37 | 1.27  | 0.974 | 1.083                 |
|        | UltraFine | $-5.3 \times 10^{-4}$ | -4.64 | -3.37 | 1.27  | 0.974 | 1.083                 |
|        | SuperFine | $-5.3 \times 10^{-4}$ | -4.64 | -3.37 | 1.27  | 0.974 | 1.083                 |

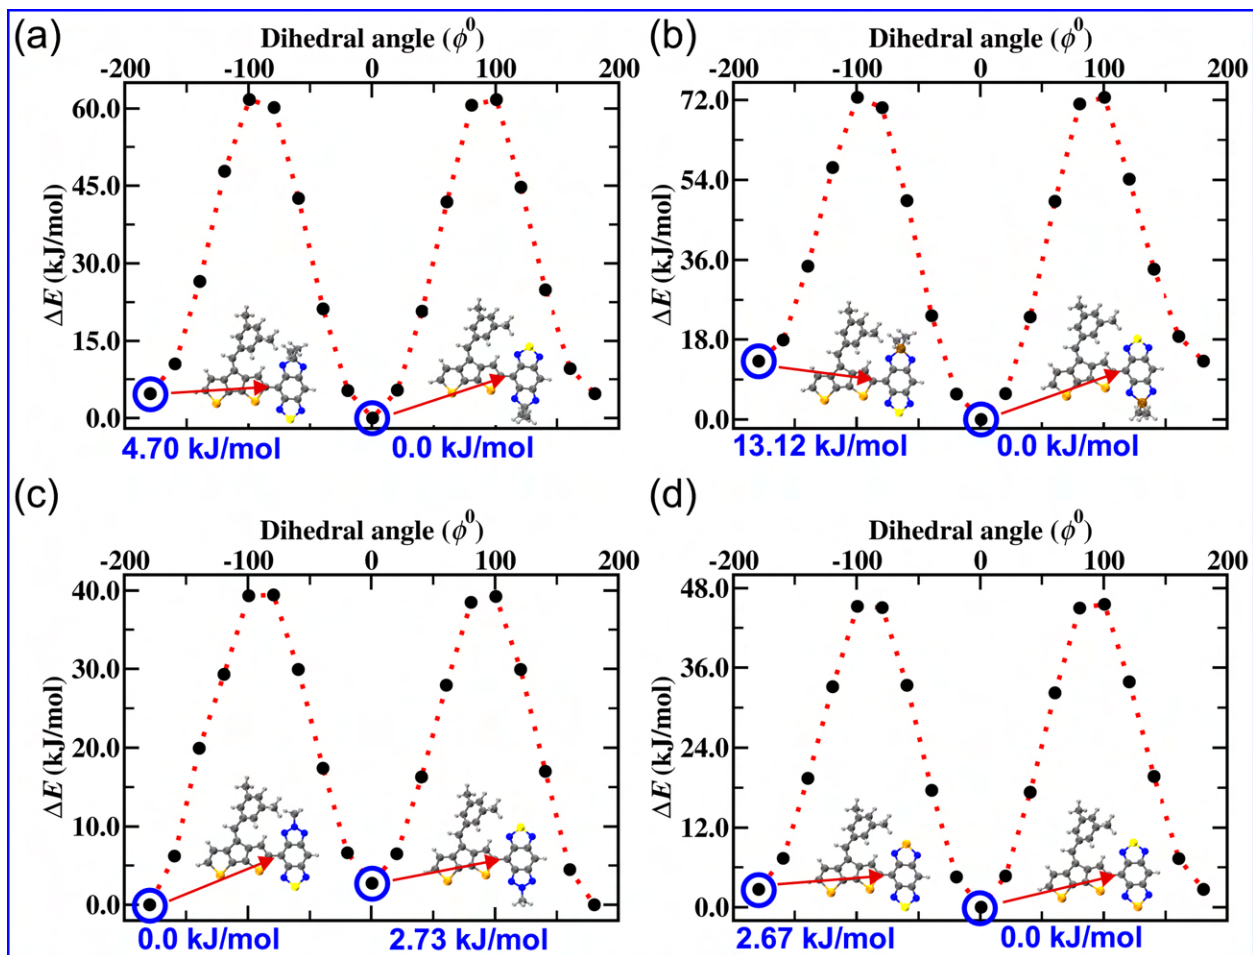

Figure S1: Dihedral scan along the annular bond connecting a donor and acceptor units of the (a) CPDS-CBBT, (b) CPDS-SiBBT, (c) CPDS-NBBT, and (d) CPDS-SeBBT ( $N = 1$ ) polymers in their singlet closed-shell state ( $S = 0$ ).

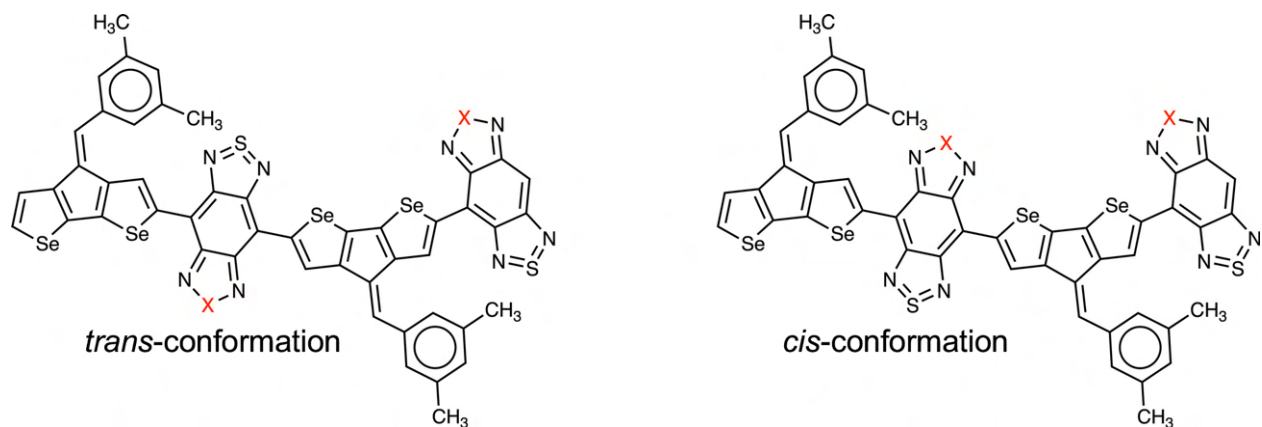

Table S2: Stability energy and singlet-triplet energy gap of the polymers ( $N = 2$ ) with different orientations of the thiadiazole units.

| Oligomer ( $N = 2$ ) | Stability Energy (kcal/mol) |              | $\Delta E_{ST}$ (eV)   |                        |
|----------------------|-----------------------------|--------------|------------------------|------------------------|
|                      | <i>trans</i> -              | <i>cis</i> - | <i>trans</i> -         | <i>cis</i> -           |
| CPDS-CBBT            | 0.00                        | +0.68        | $-5.33 \times 10^{-4}$ | $-5.96 \times 10^{-4}$ |
| CPDS-SiBBT           | 0.00                        | +0.22        | $+3.90 \times 10^{-4}$ | $+3.62 \times 10^{-4}$ |
| CPDS-NBBT            | 0.00                        | +0.80        | $-2.13 \times 10^{-1}$ | $-2.17 \times 10^{-1}$ |
| CPDS-SeBBT           | +0.25                       | 0.00         | $-1.86 \times 10^{-2}$ | $-1.85 \times 10^{-2}$ |

Table S3: Electronic properties computed at (U)B3LYP/6-31G(d,p) level of theory and basis set for the CPDS-CBBT, CPDS-SiBBT, CPDS-NBBT, and CPDS-SeBBT polymers, provided as a function of chain length ( $N$ ). The singlet–triplet energy gap ( $\Delta E_{\text{ST}}$ ), population ( $P_{\text{T}}$ ) of the triplet ( $S = 1$ ) state at room temperature, energy of the FMOs, energetic difference between the FMOs ( $E_{\text{g}}$ ), and diradical character index ( $y_0$ ). Energy values are provided in eV, and  $y_0$  is a dimensionless quantity.

| Polymer    | $N$ | $\Delta E_{\text{ST}}$ | $P_{\text{T}}$ | HOMO  | LUMO  | $E_{\text{g}}$ | $y_0$ |
|------------|-----|------------------------|----------------|-------|-------|----------------|-------|
| CPDS-CBBT  | 1   | $-9.23 \times 10^{-2}$ | 9.35           | -4.79 | -3.25 | 1.55           | 0.617 |
|            | 2   | $-5.33 \times 10^{-4}$ | 74.63          | -4.64 | -3.37 | 1.27           | 0.974 |
|            | 3   | $+7.07 \times 10^{-6}$ | 75.00          | -4.60 | -3.40 | 1.20           | 0.998 |
|            | 4   | $+2.72 \times 10^{-7}$ | 75.00          | -4.58 | -3.41 | 1.17           | 1.000 |
|            | 5   | $0.00 \times 10^{-0}$  | 75.00          | -4.57 | -3.42 | 1.16           | 1.000 |
|            | 6   | $0.00 \times 10^{-0}$  | 75.00          | -4.57 | -3.42 | 1.15           | 1.000 |
|            | 7   | $0.00 \times 10^{-0}$  | 75.00          | -4.57 | -3.42 | 1.14           | 1.000 |
|            | 8   | $0.00 \times 10^{-0}$  | 75.00          | -4.57 | -3.43 | 1.14           | 1.000 |
| CPDS-SiBBT | 1   | $-2.33 \times 10^{-2}$ | 55.99          | -4.78 | -3.42 | 1.37           | 0.787 |
|            | 2   | $+3.90 \times 10^{-4}$ | 75.27          | -4.69 | -3.49 | 1.20           | 0.999 |
|            | 3   | $-8.44 \times 10^{-6}$ | 74.99          | -4.66 | -3.52 | 1.14           | 1.000 |
|            | 4   | $0.00 \times 10^{-0}$  | 75.00          | -4.64 | -3.53 | 1.11           | 1.000 |
|            | 5   | $0.00 \times 10^{-0}$  | 75.00          | -4.63 | -3.54 | 1.09           | 1.000 |
|            | 6   | $0.00 \times 10^{-0}$  | 75.00          | -4.63 | -3.54 | 1.08           | 1.000 |
|            | 7   | $0.00 \times 10^{-0}$  | 75.00          | -4.62 | -3.55 | 1.08           | 1.000 |
|            | 8   | $0.00 \times 10^{-0}$  | 75.00          | -4.62 | -3.55 | 1.07           | 1.000 |
| CPDS-NBBT  | 1   | $-6.57 \times 10^{-1}$ | 0.00           | -4.80 | -2.89 | 1.91           | 0.000 |
|            | 2   | $-2.13 \times 10^{-1}$ | 0.12           | -4.35 | -3.11 | 1.24           | 0.193 |
|            | 3   | $-7.49 \times 10^{-2}$ | 16.08          | -4.22 | -3.16 | 1.05           | 0.610 |
|            | 4   | $-2.78 \times 10^{-2}$ | 51.93          | -4.15 | -3.19 | 0.96           | 0.838 |
|            | 5   | $-1.05 \times 10^{-2}$ | 67.08          | -4.11 | -3.21 | 0.90           | 0.938 |
|            | 6   | $-4.01 \times 10^{-3}$ | 72.14          | -4.09 | -3.22 | 0.87           | 0.977 |
|            | 7   | $-1.53 \times 10^{-3}$ | 73.93          | -4.07 | -3.23 | 0.85           | 0.991 |
|            | 8   | $-5.82 \times 10^{-4}$ | 74.60          | -4.07 | -3.23 | 0.85           | 0.997 |
| CPDS-SeBBT | 1   | $-2.62 \times 10^{-1}$ | 0.02           | -4.89 | -3.28 | 1.61           | 0.244 |
|            | 2   | $-1.86 \times 10^{-2}$ | 60.27          | -4.60 | -3.45 | 1.16           | 0.832 |
|            | 3   | $-1.09 \times 10^{-3}$ | 74.24          | -4.52 | -3.47 | 1.05           | 0.971 |
|            | 4   | $-5.88 \times 10^{-5}$ | 74.96          | -4.49 | -3.48 | 1.00           | 0.995 |
|            | 5   | $-2.99 \times 10^{-5}$ | 74.99          | -4.47 | -3.49 | 0.98           | 0.999 |
|            | 6   | $0.00 \times 10^{-0}$  | 75.00          | -4.46 | -3.49 | 0.97           | 1.000 |
|            | 7   | $0.00 \times 10^{-0}$  | 75.00          | -4.45 | -3.50 | 0.95           | 1.000 |
|            | 8   | $0.00 \times 10^{-0}$  | 75.00          | -4.45 | -3.50 | 0.95           | 1.000 |

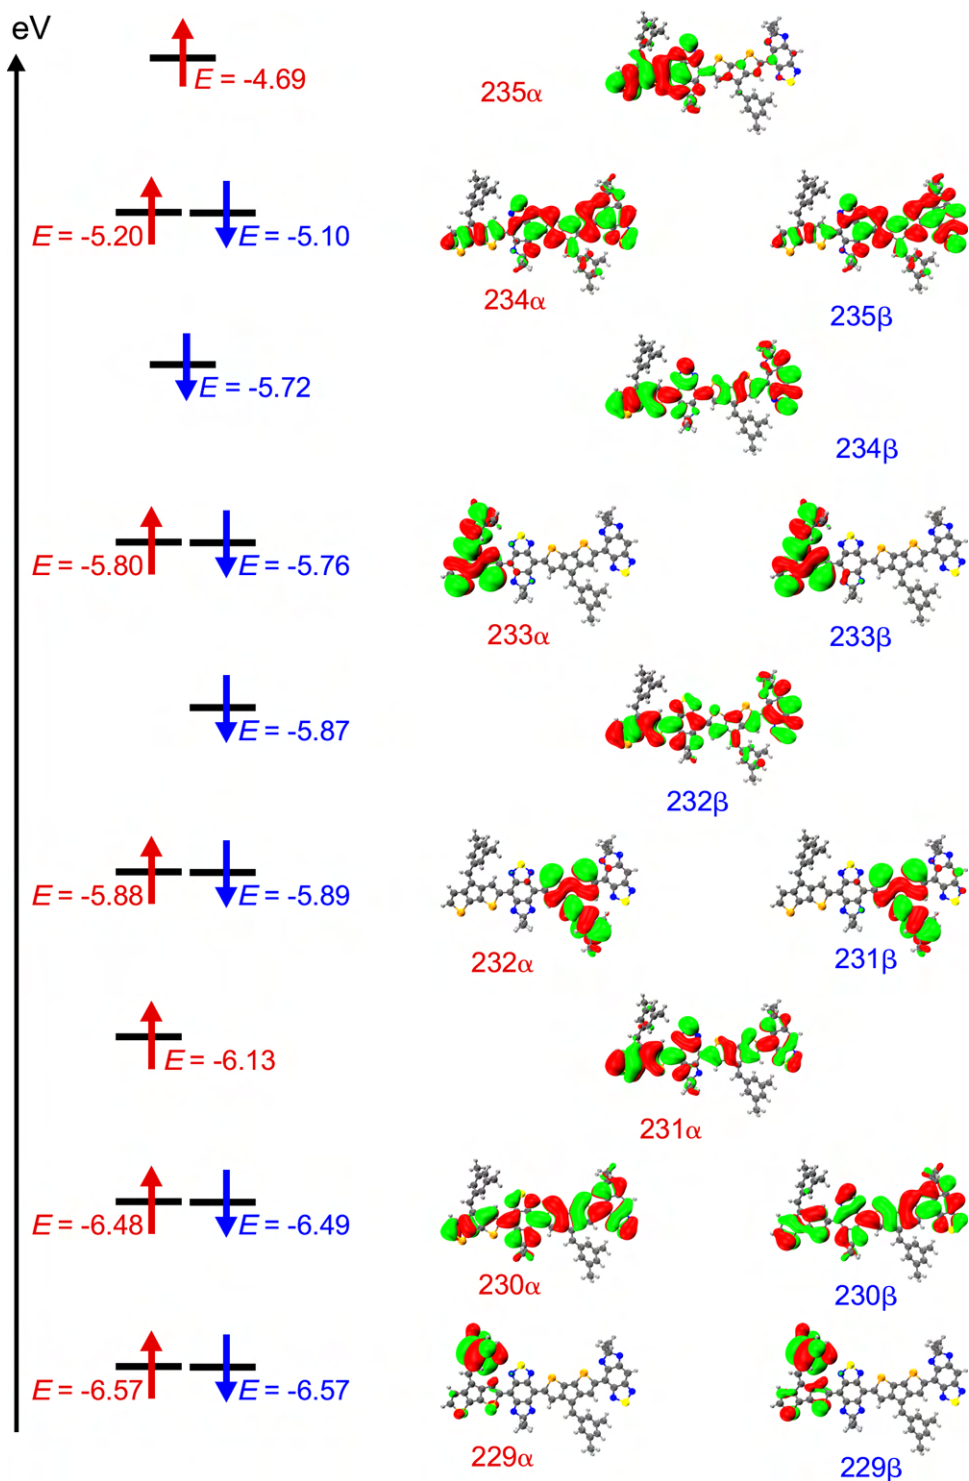

Figure S2: Molecular orbitals (MOs) and their energies at the singlet ( $S = 0$ ) state for CPDS-CBBT dimer ( $N = 2$ ). The green and red surfaces represent positive and negative contributions of the MOs at an isovalue = 0.01 au.

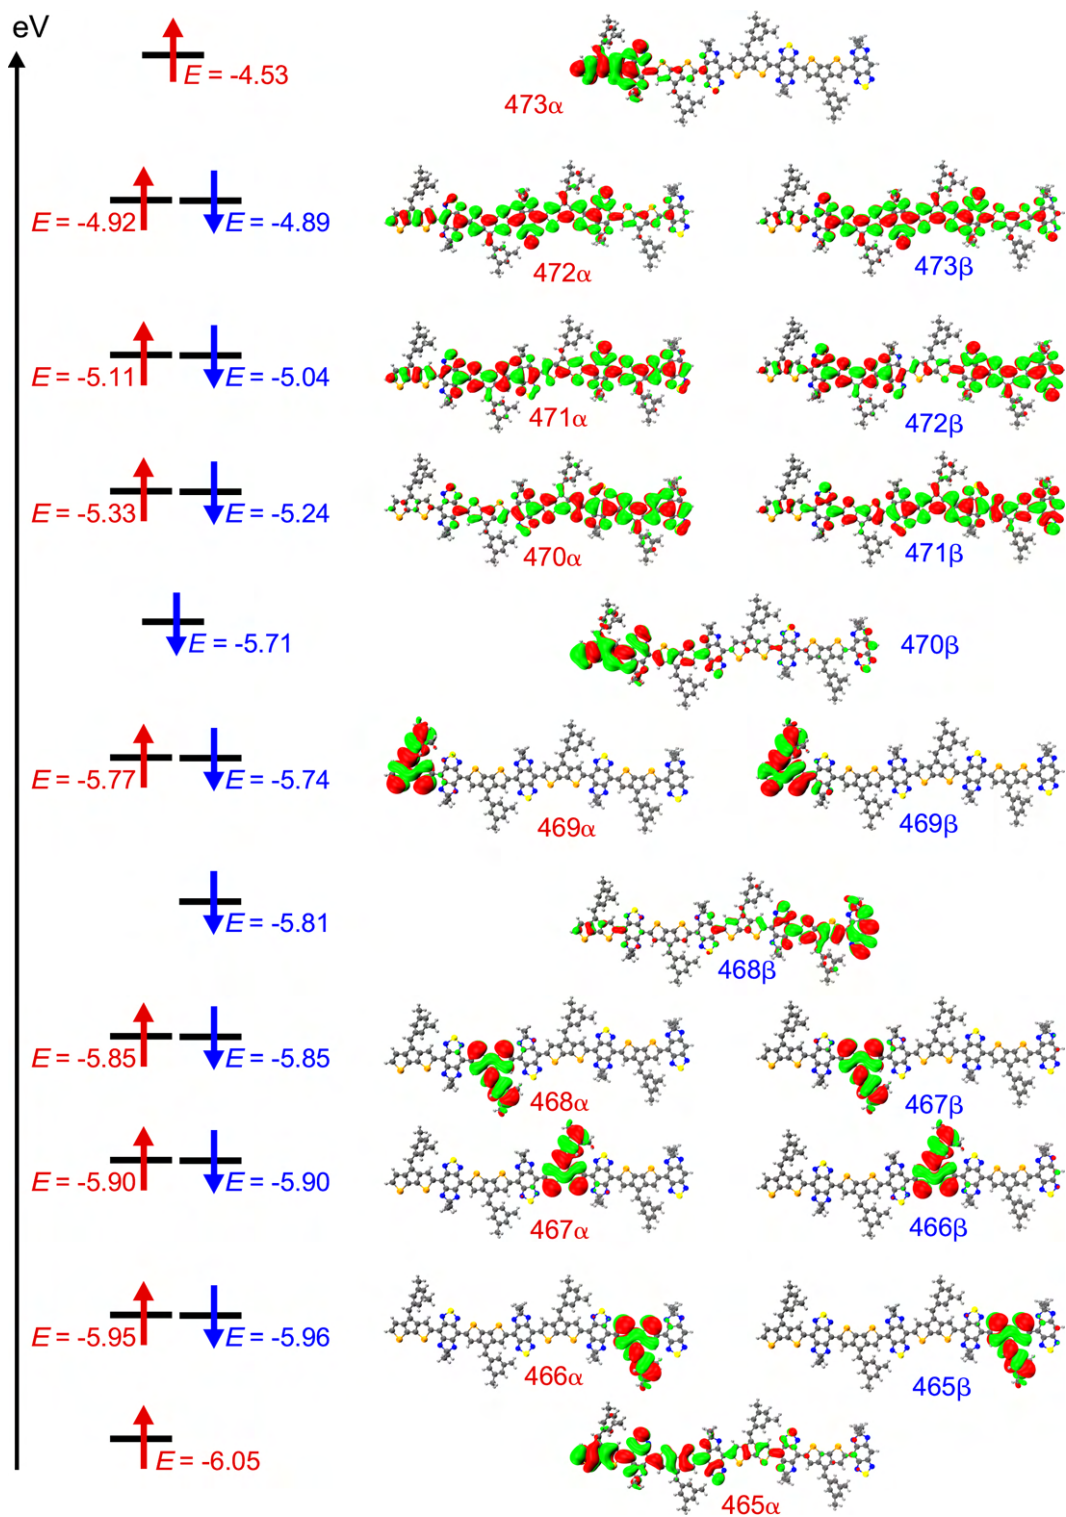

Figure S3: Molecular orbitals (MOs) and their energies at the singlet ( $S = 0$ ) state for CPDS-CBBT tetramer ( $N = 4$ ). The green and red surfaces represent positive and negative contributions of the MOs at an isovalue = 0.01 au.

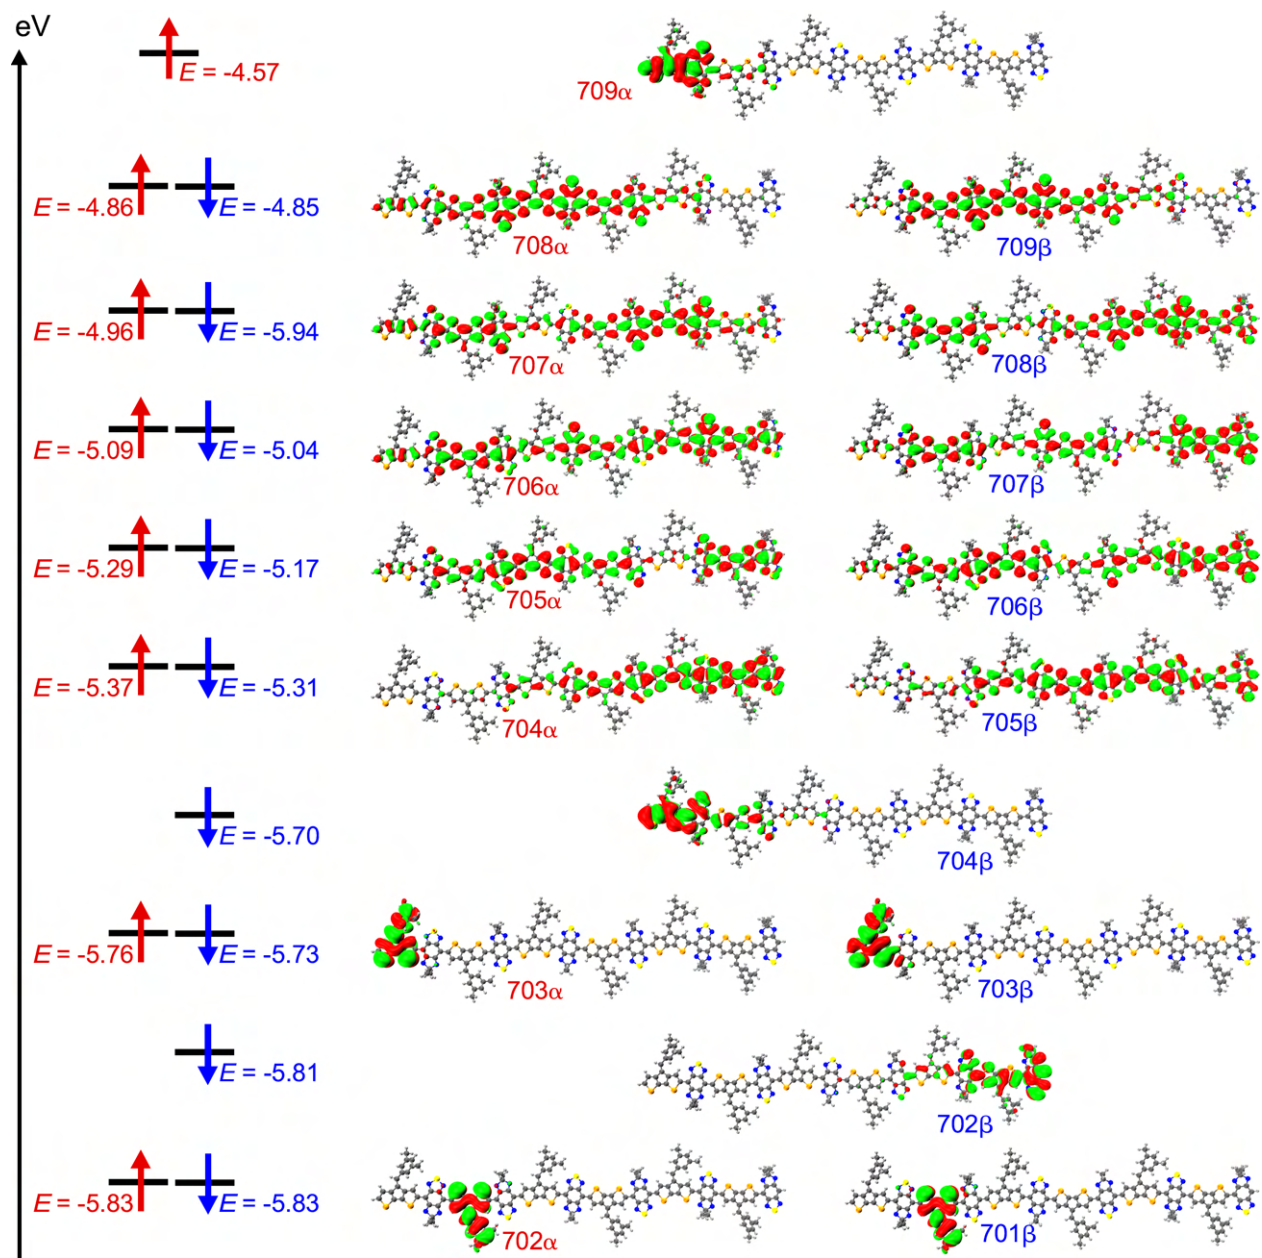

Figure S4: Molecular orbitals (MOs) and their energies at the singlet ( $S = 0$ ) state for CPDS-CBBT hexamer ( $N = 6$ ). The green and red surfaces represent positive and negative contributions of the MOs at an isovalue = 0.01 au.

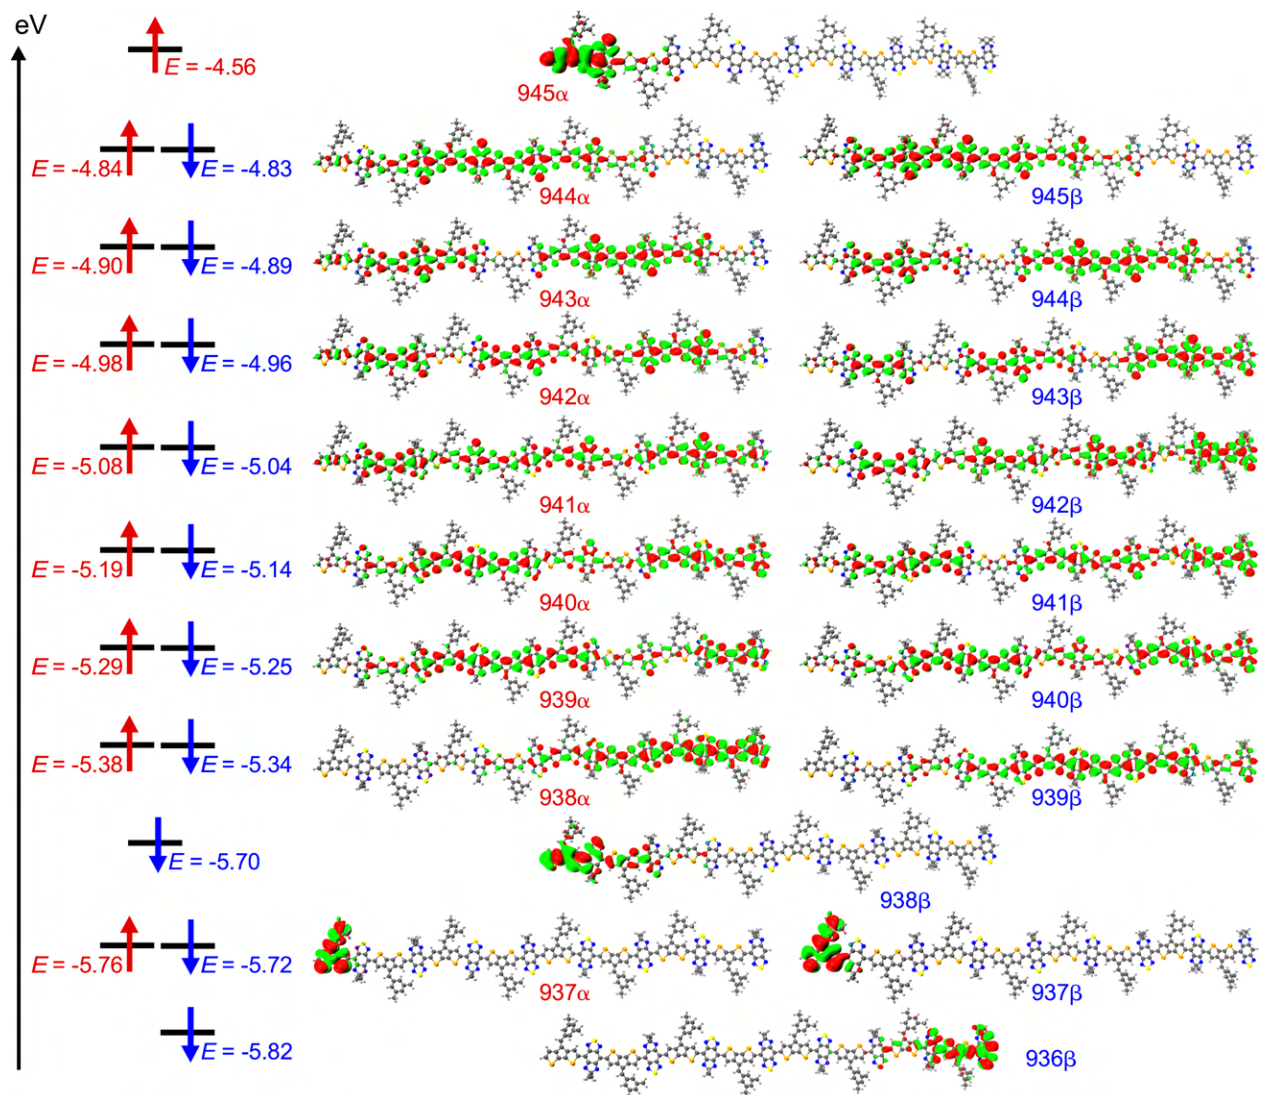

Figure S5: Molecular orbitals (MOs) and their energies at the singlet ( $S = 0$ ) state for CPDS-CBBT octamer ( $N = 8$ ). The green and red surfaces represent positive and negative contributions of the MOs at an isovalue = 0.01 au.



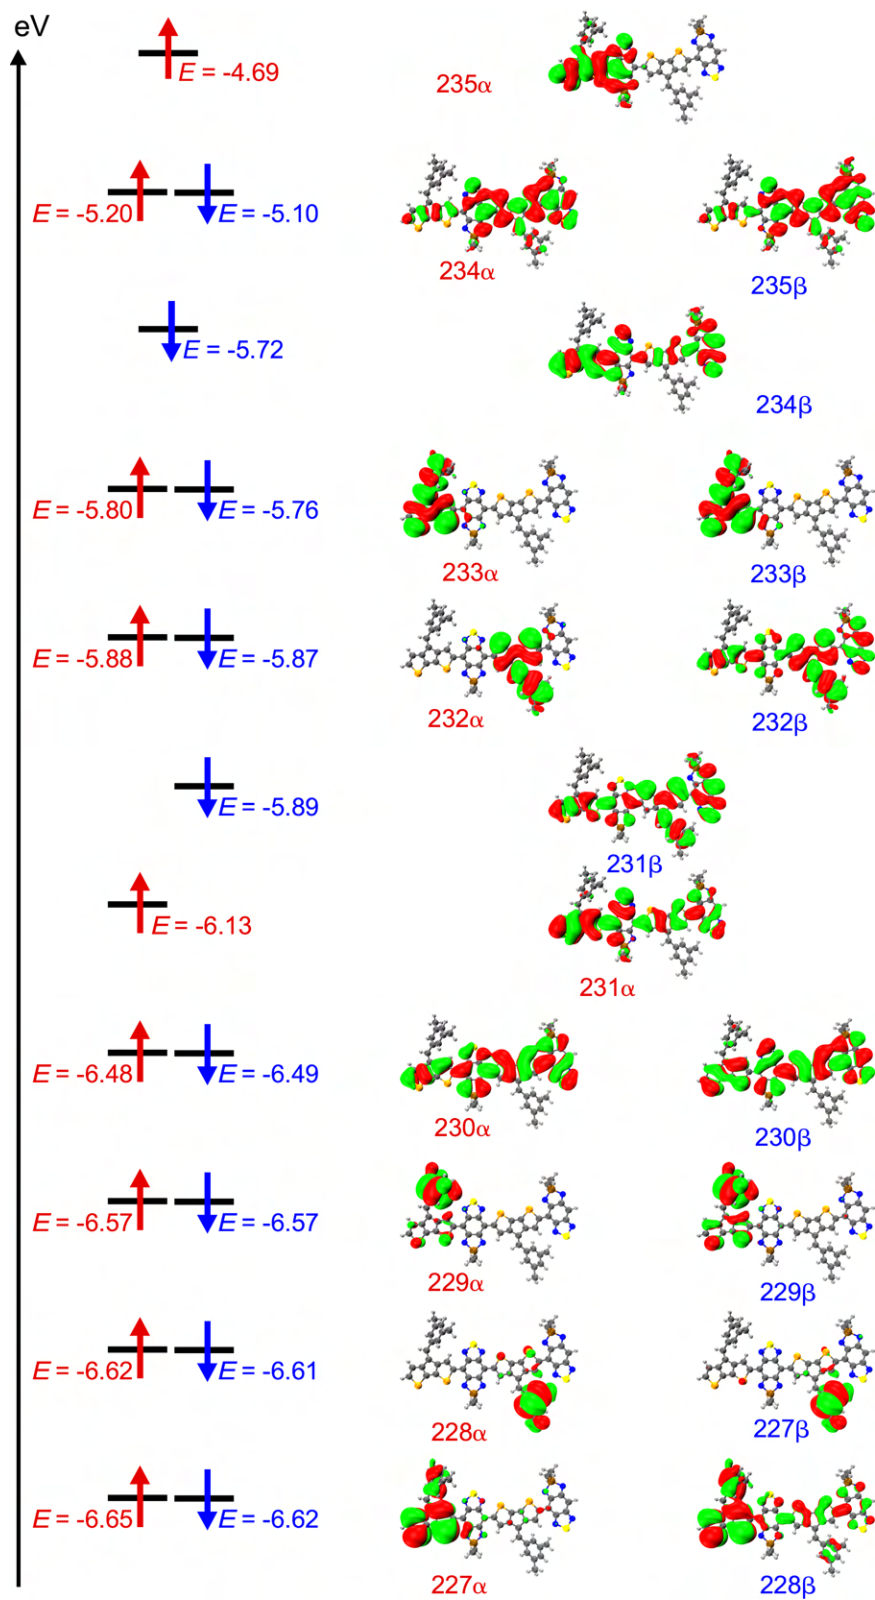

Figure S6: Molecular orbitals (MOs) and their energies at the singlet ( $S = 0$ ) state for CPDS-SiBBT dimer ( $N = 2$ ). The green and red surfaces represent positive and negative contributions of the MOs at an isovalue = 0.01 au.

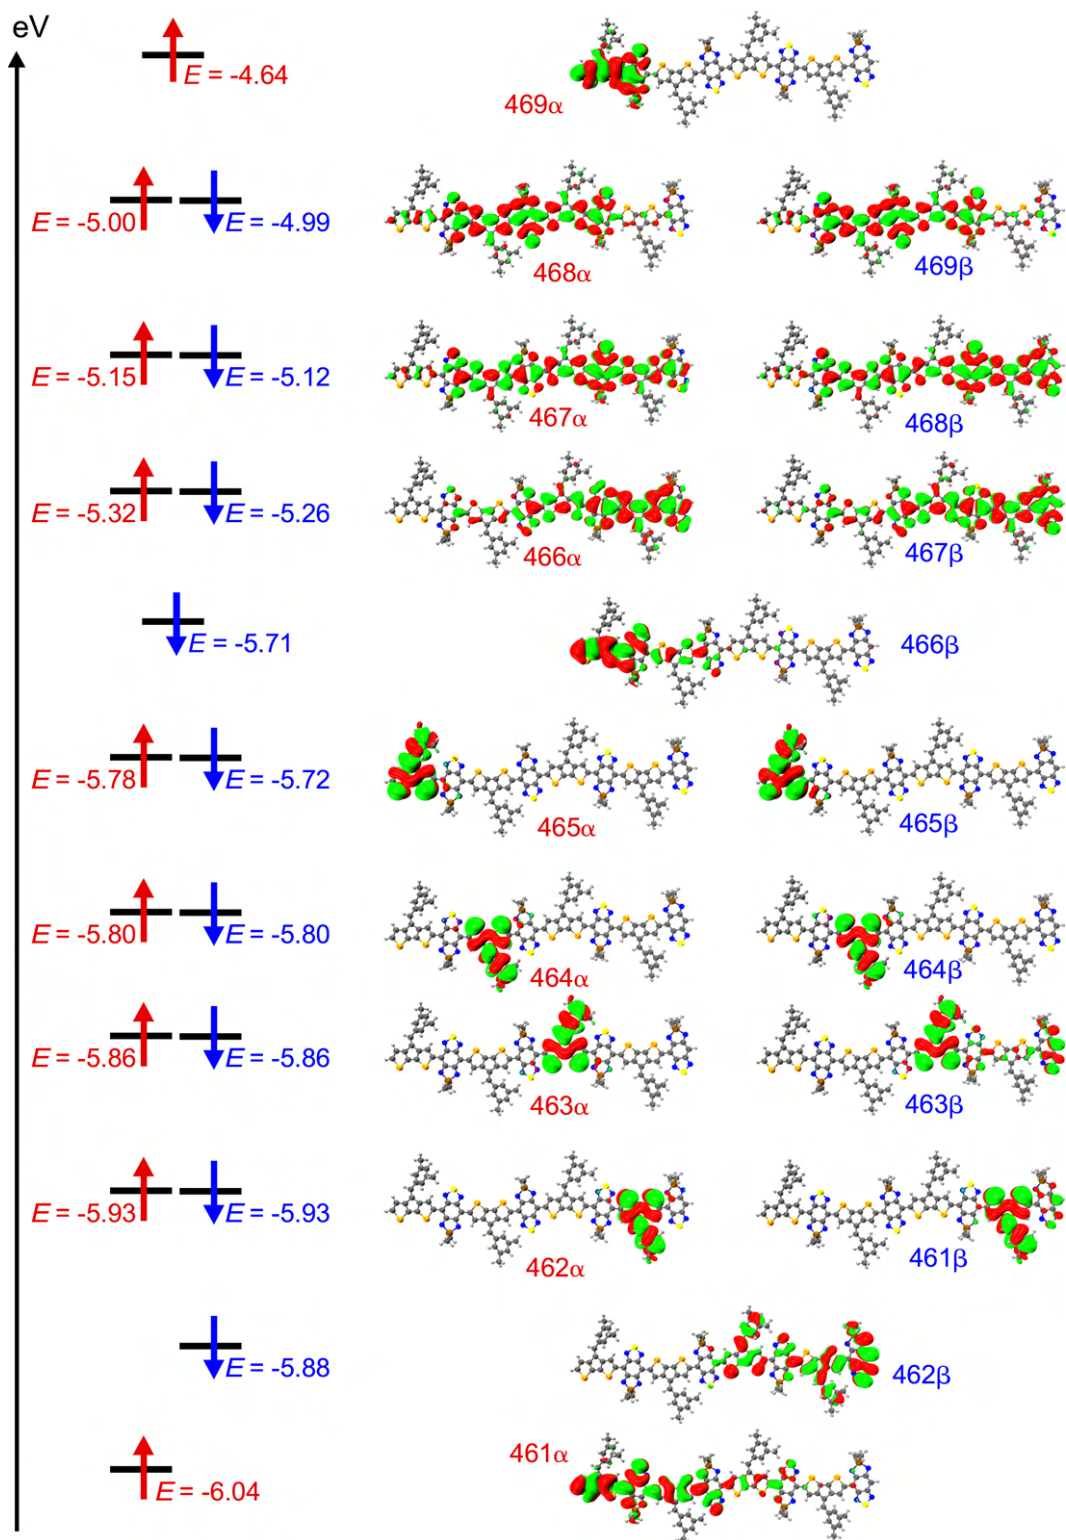

Figure S7: Molecular orbitals (MOs) and their energies at the singlet ( $S = 0$ ) state for CPDS-SiBBT tetramer ( $N = 4$ ). The green and red surfaces represent positive and negative contributions of the MOs at an isovalue = 0.01 au.

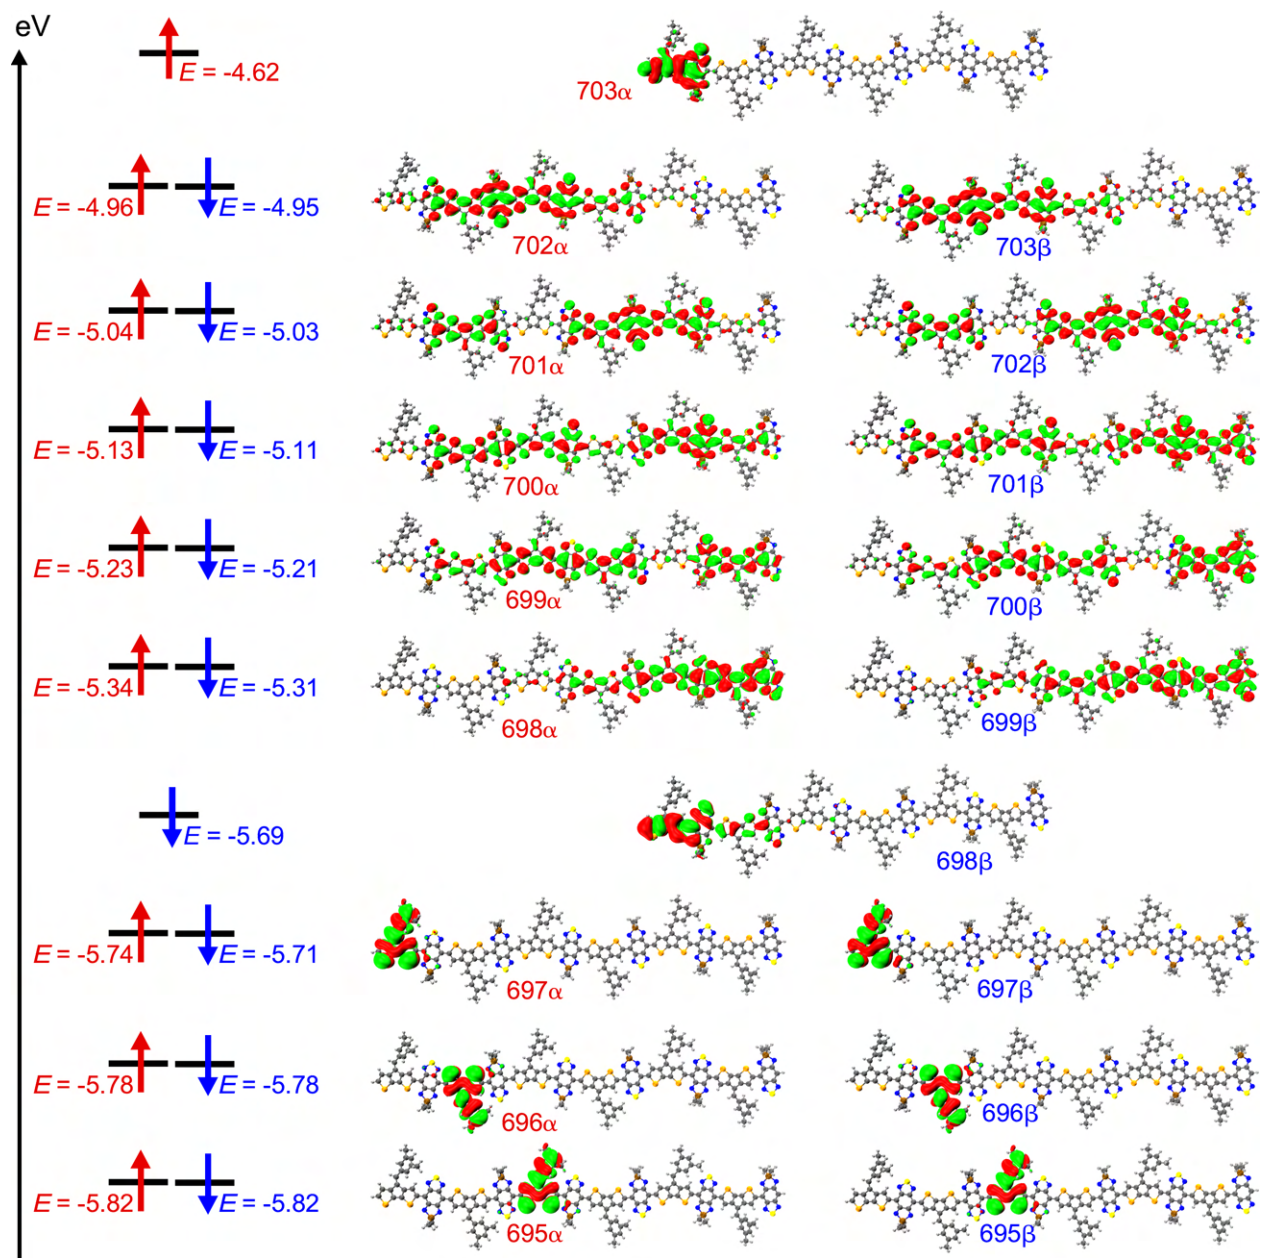

Figure S8: Molecular orbitals (MOs) and their energies at the singlet ( $S = 0$ ) state for CPDS-SiBBT hexamer ( $N = 6$ ). The green and red surfaces represent positive and negative contributions of the MOs at an isovalue = 0.01 au.

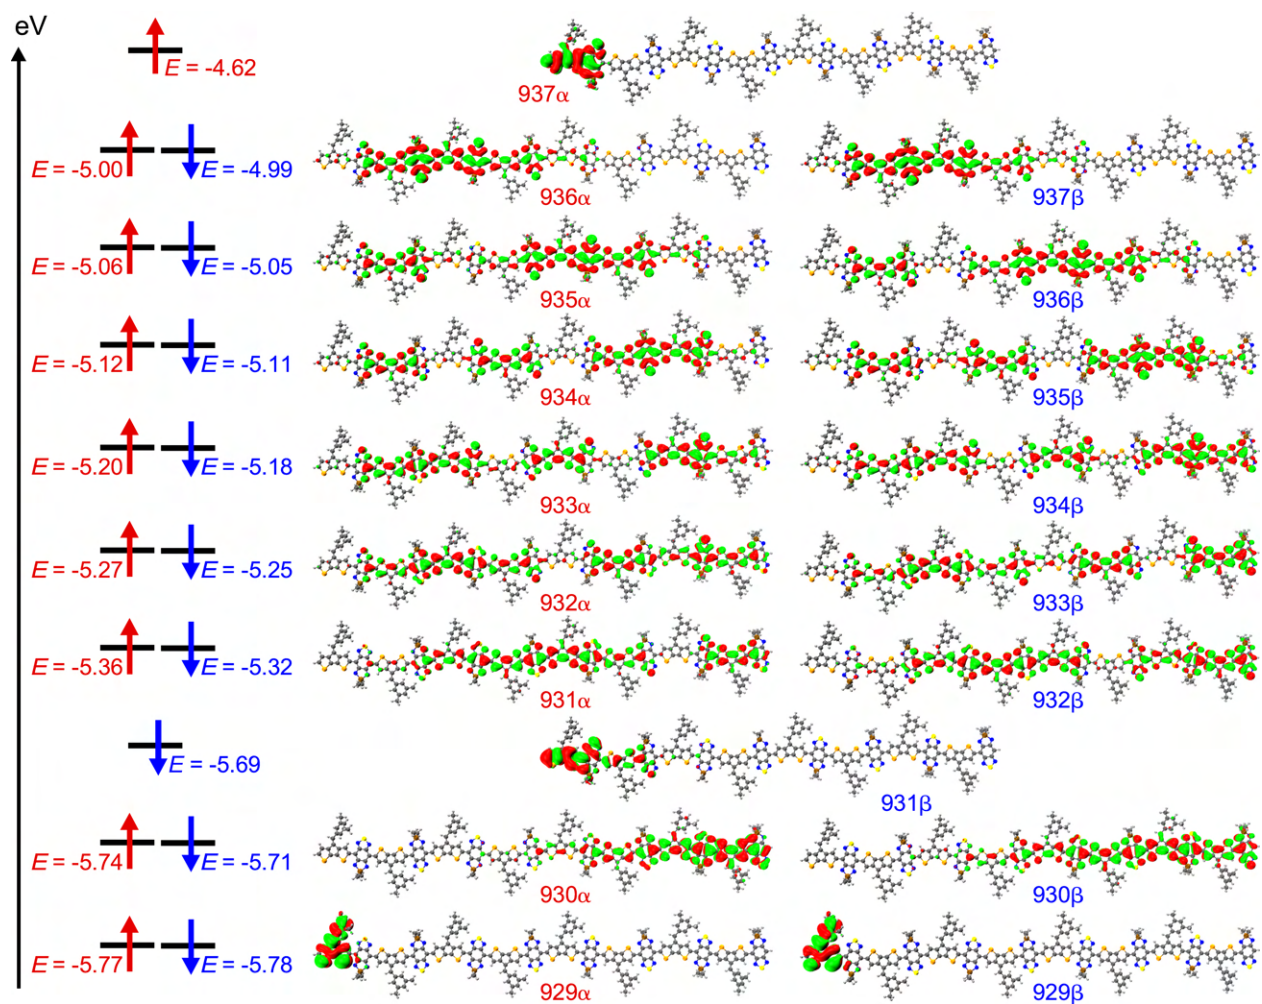

Figure S9: Molecular orbitals (MOs) and their energies at the singlet ( $S = 0$ ) state for CPDS-SiBBT octamer ( $N = 8$ ). The green and red surfaces represent positive and negative contributions of the MOs at an isovalue = 0.01 au.

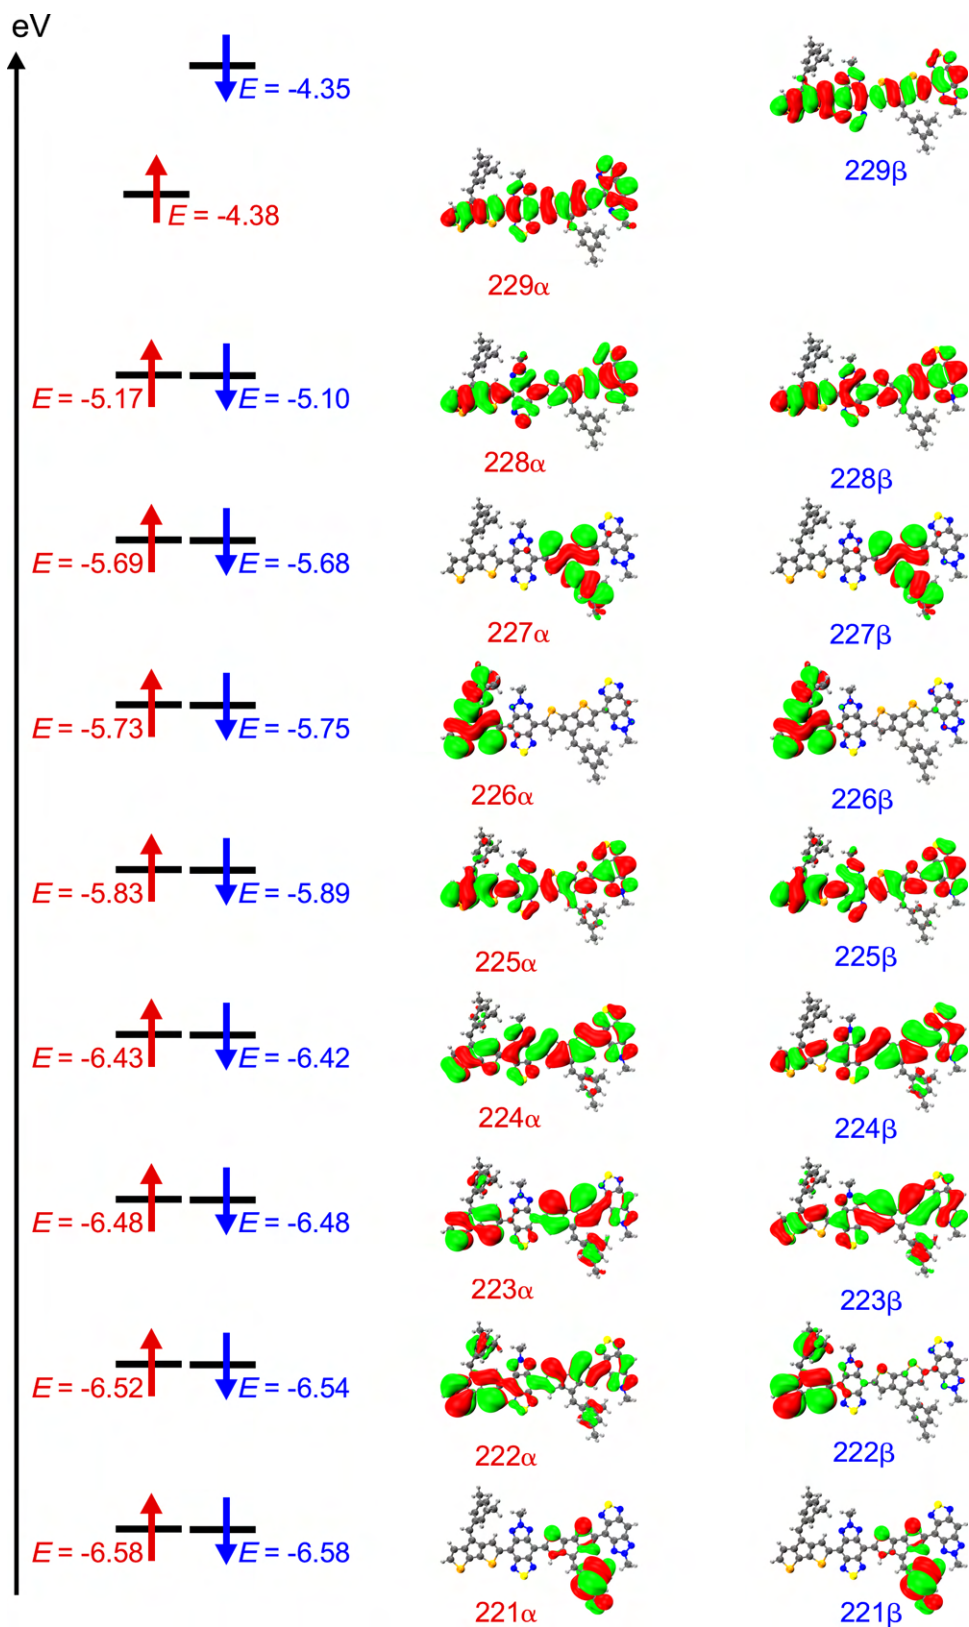

Figure S10: Molecular orbitals (MOs) and their energies at the singlet ( $S = 0$ ) state for CPDS-NBBT dimer ( $N = 2$ ). The green and red surfaces represent positive and negative contributions of the MOs at an isovalue = 0.01 au.

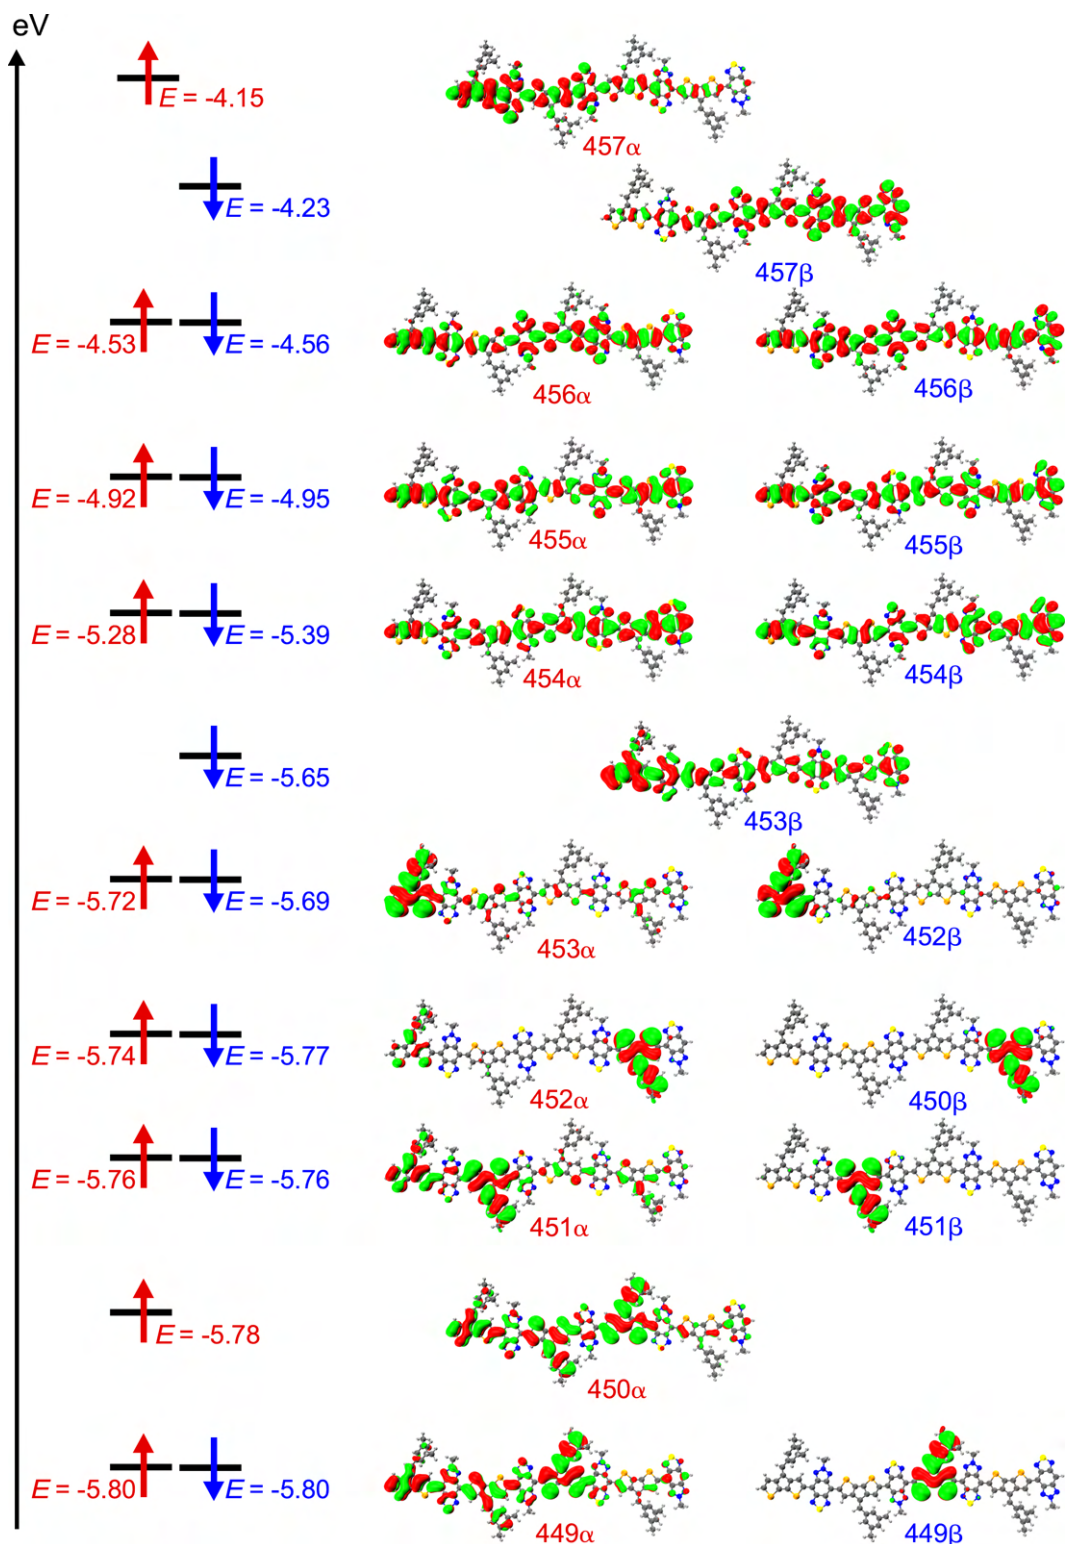

Figure S11: Molecular orbitals (MOs) and their energies at the singlet ( $S = 0$ ) state for CPDS-NBBT tetramer ( $N = 4$ ). The green and red surfaces represent positive and negative contributions of the MOs at an isovalue = 0.01 au.

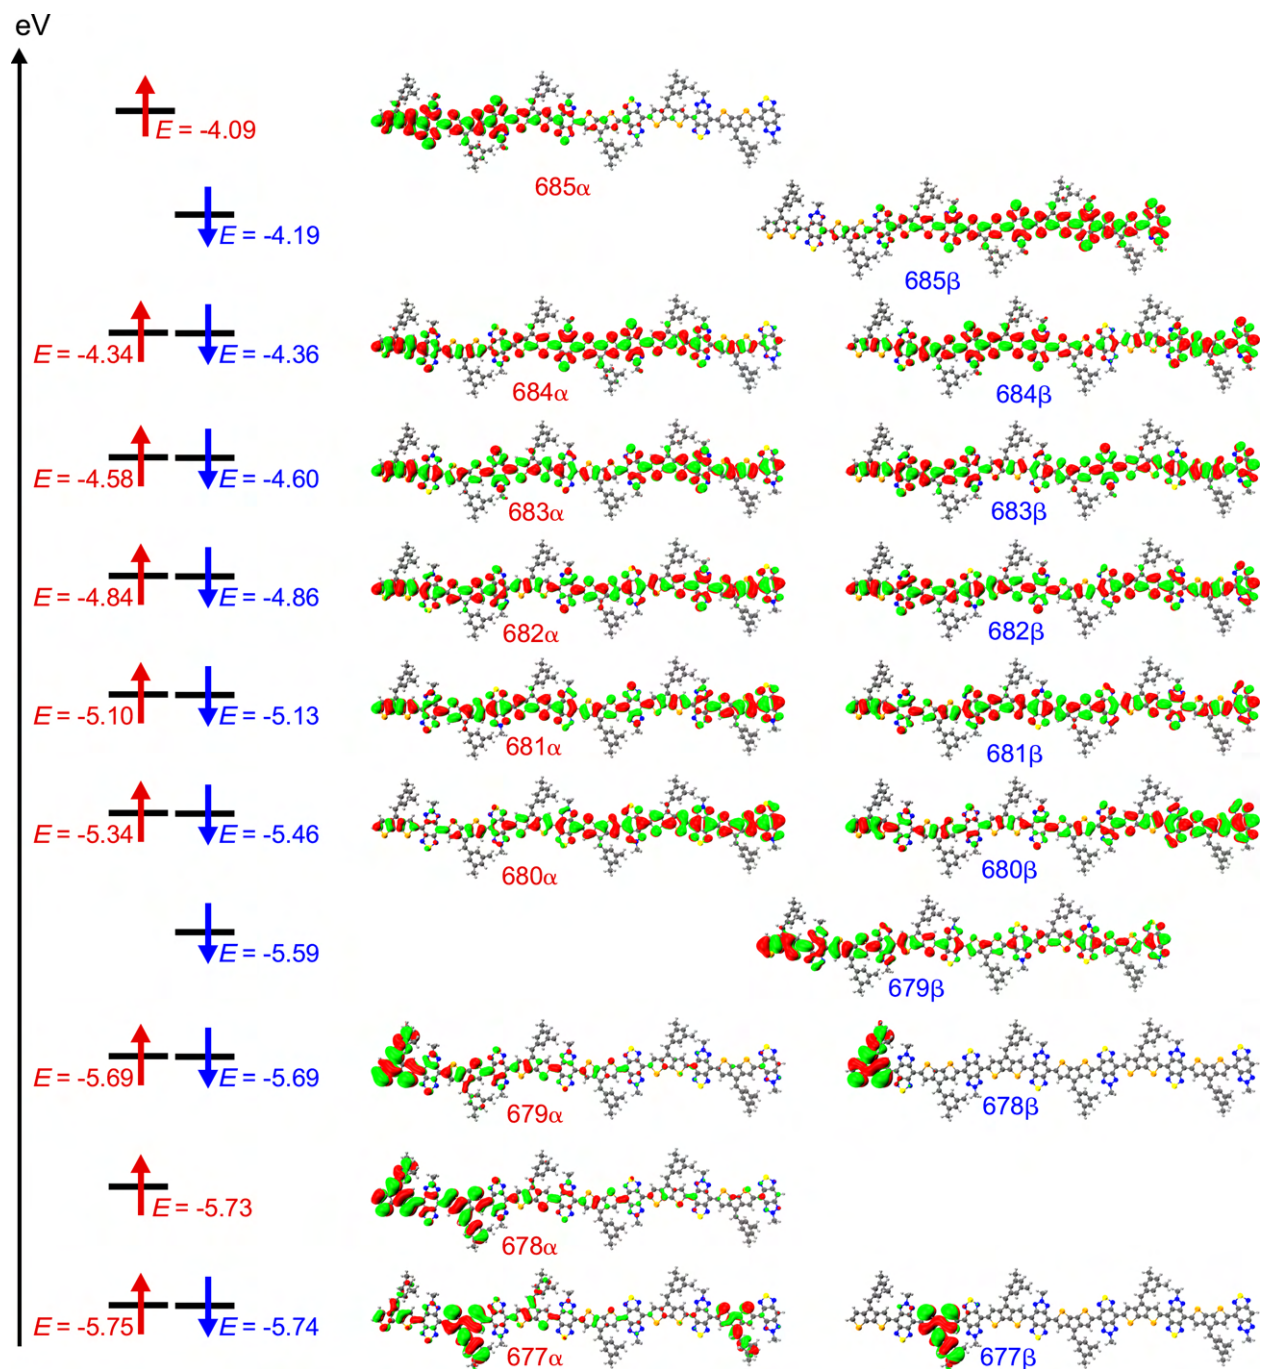

Figure S12: Molecular orbitals (MOs) and their energies at the singlet ( $S = 0$ ) state for CPDS-NBBT hexamer ( $N = 6$ ). The green and red surfaces represent positive and negative contributions of the MOs at an isovalue = 0.01 au.

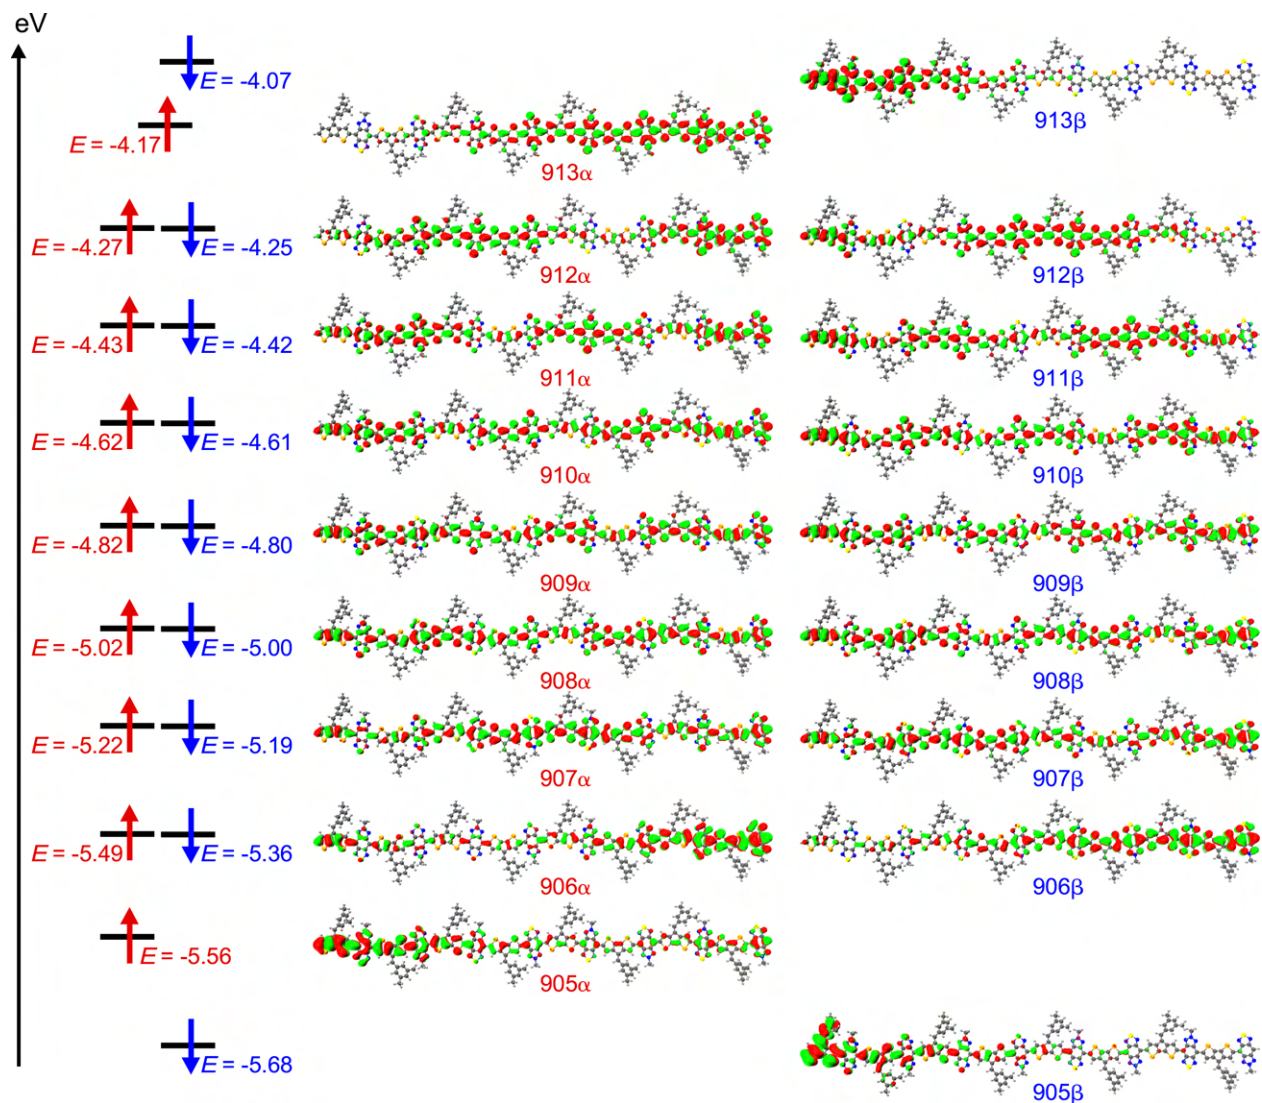

Figure S13: Molecular orbitals (MOs) and their energies at the singlet ( $S = 0$ ) state for CPDS-NBBT octamer ( $N = 8$ ). The green and red surfaces represent positive and negative contributions of the MOs at an isovalue = 0.01 au.



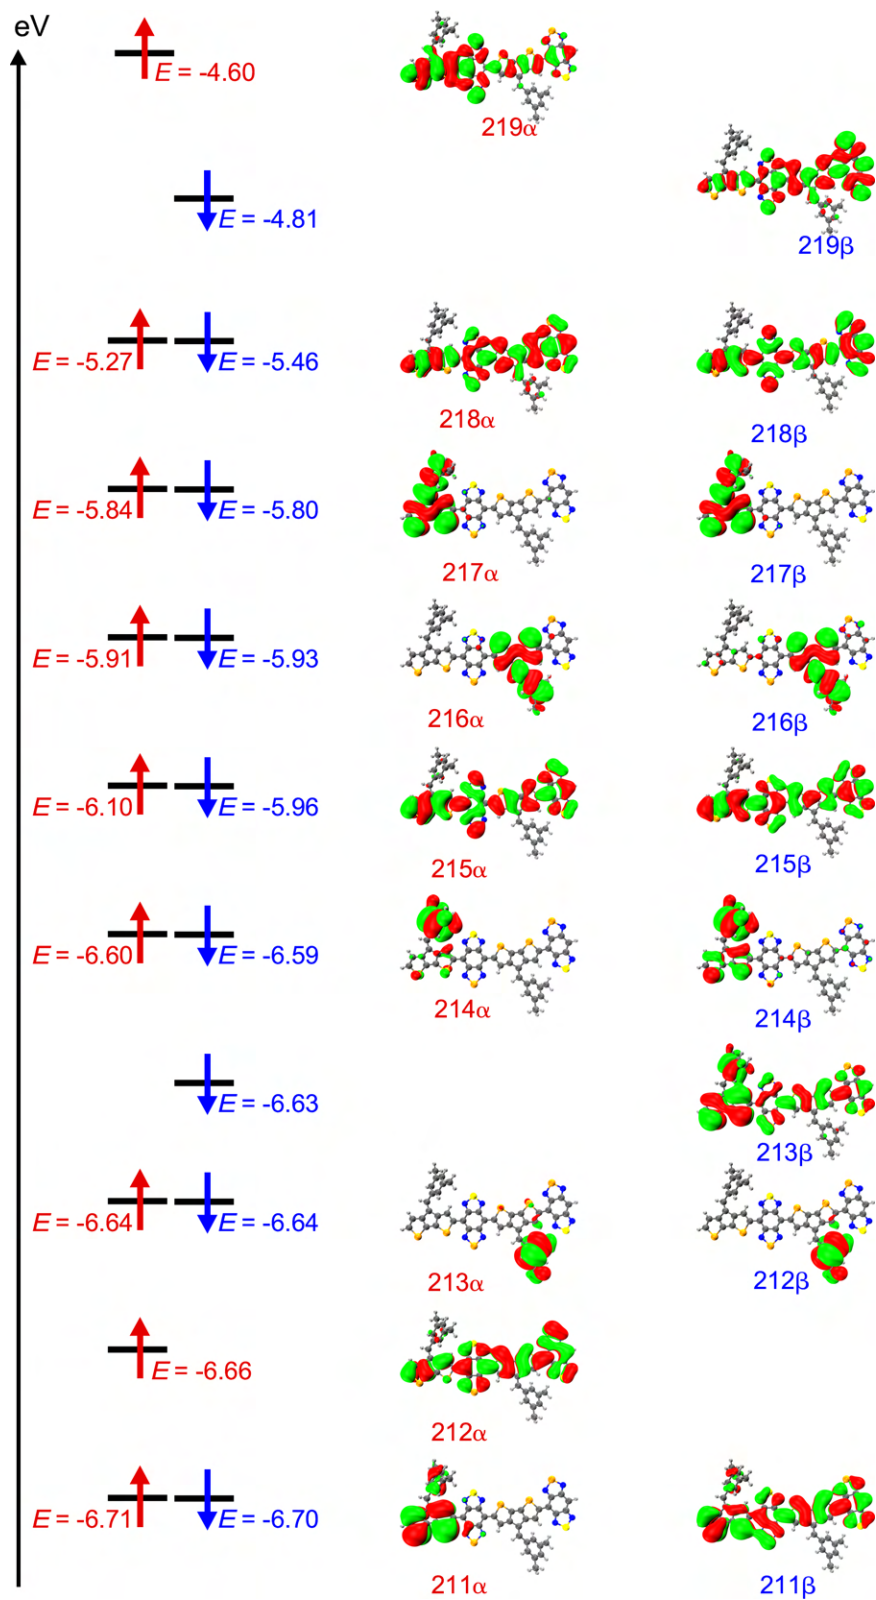

Figure S14: Molecular orbitals (MOs) and their energies at the singlet ( $S = 0$ ) state for CPDS-SeBBT dimer ( $N = 2$ ). The green and red surfaces represent positive and negative contributions of the MOs at an isovalue = 0.01 au.

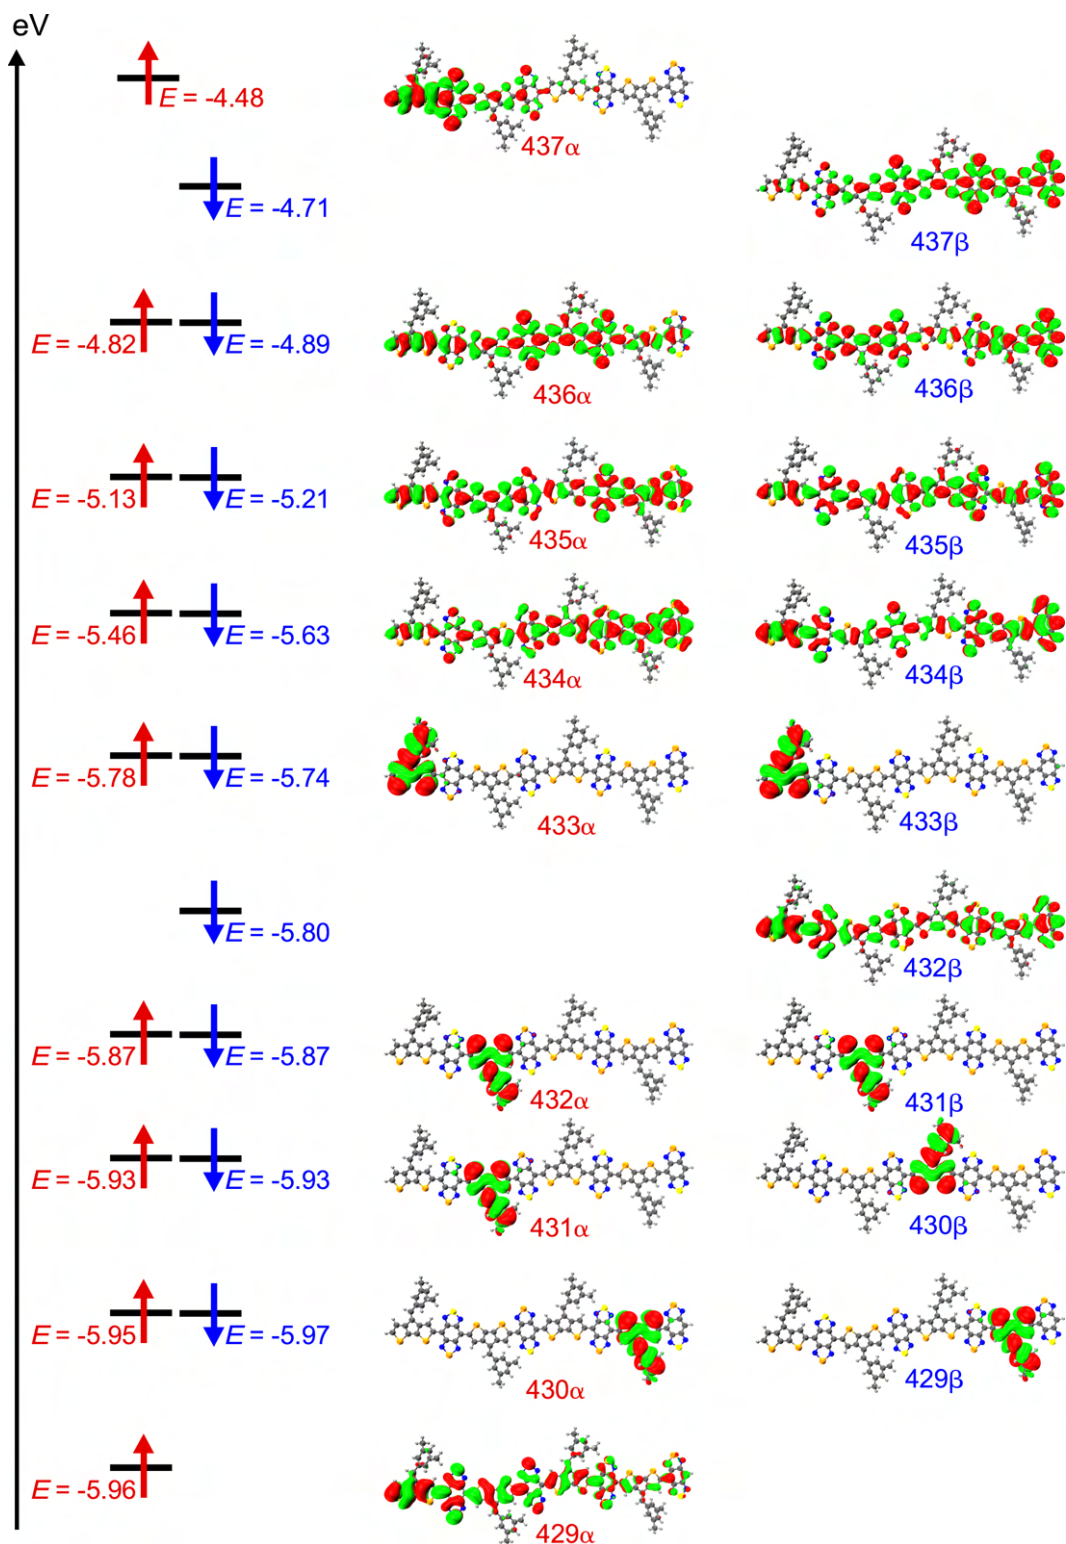

Figure S15: Molecular orbitals (MOs) and their energies at the singlet ( $S = 0$ ) state for CPDS-SeBBT tetramer ( $N = 4$ ). The green and red surfaces represent positive and negative contributions of the MOs at an isovalue = 0.01 au.

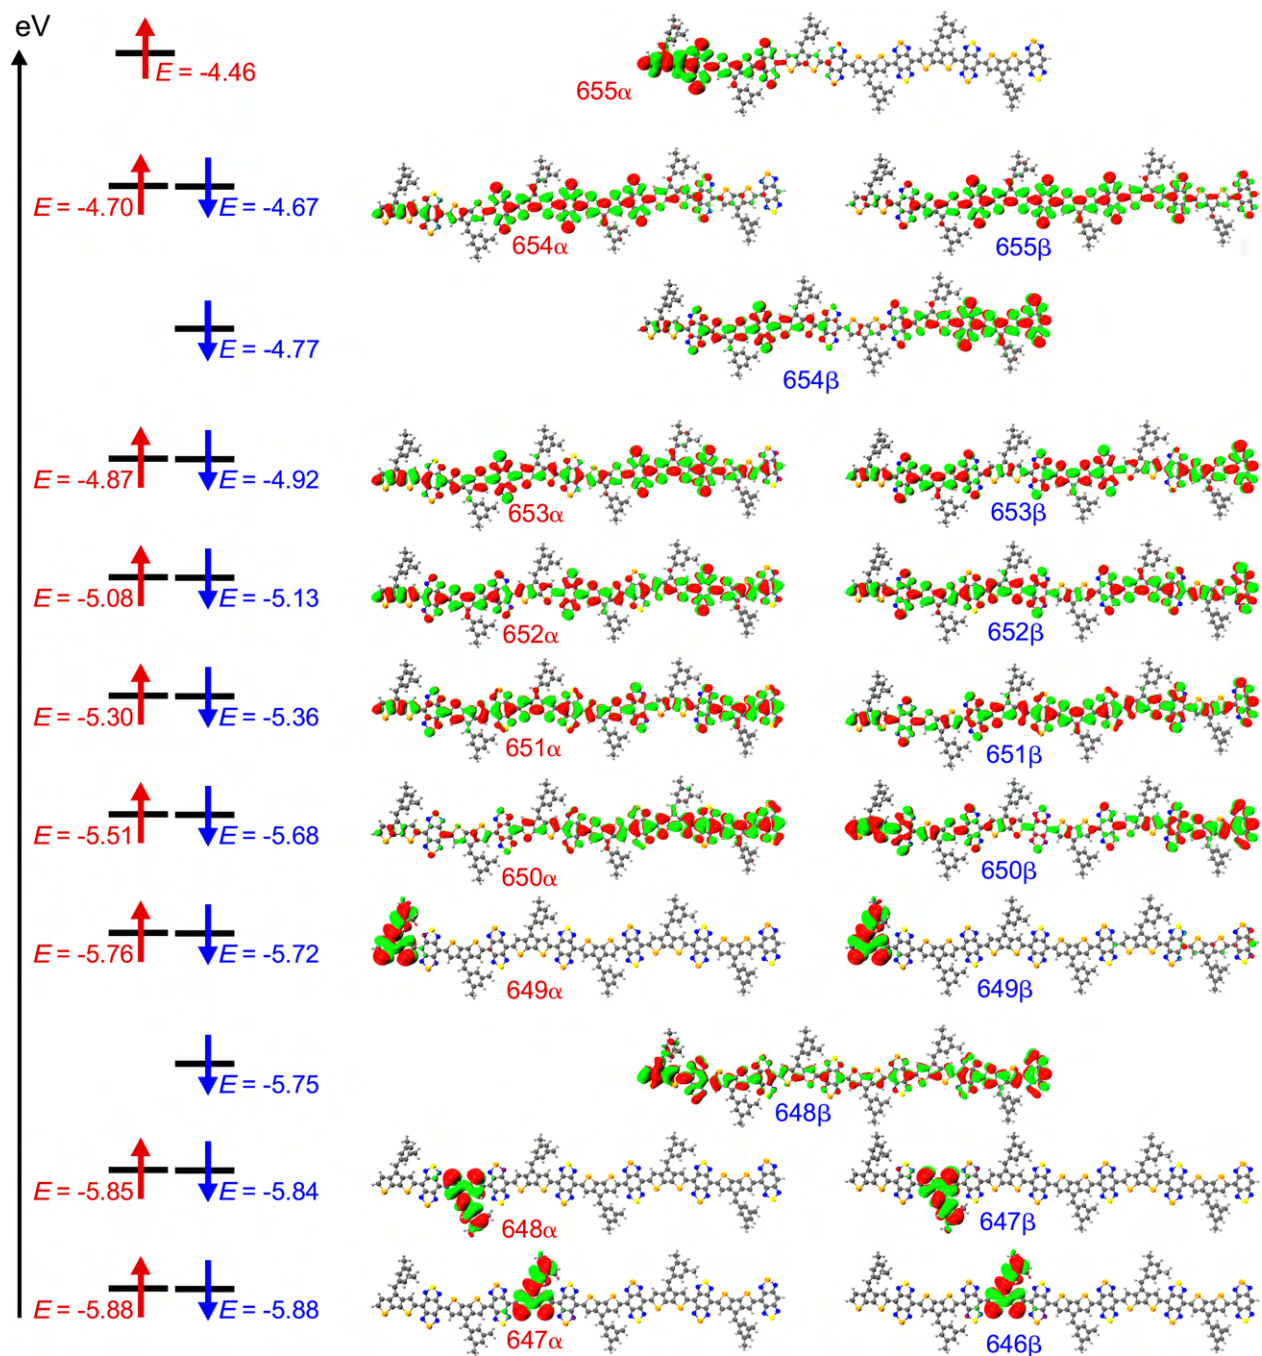

Figure S16: Molecular orbitals (MOs) and their energies at the singlet ( $S = 0$ ) state for CPDS-SeBBT hexamer ( $N = 6$ ). The green and red surfaces represent positive and negative contributions of the MOs at an isovalue = 0.01 au.

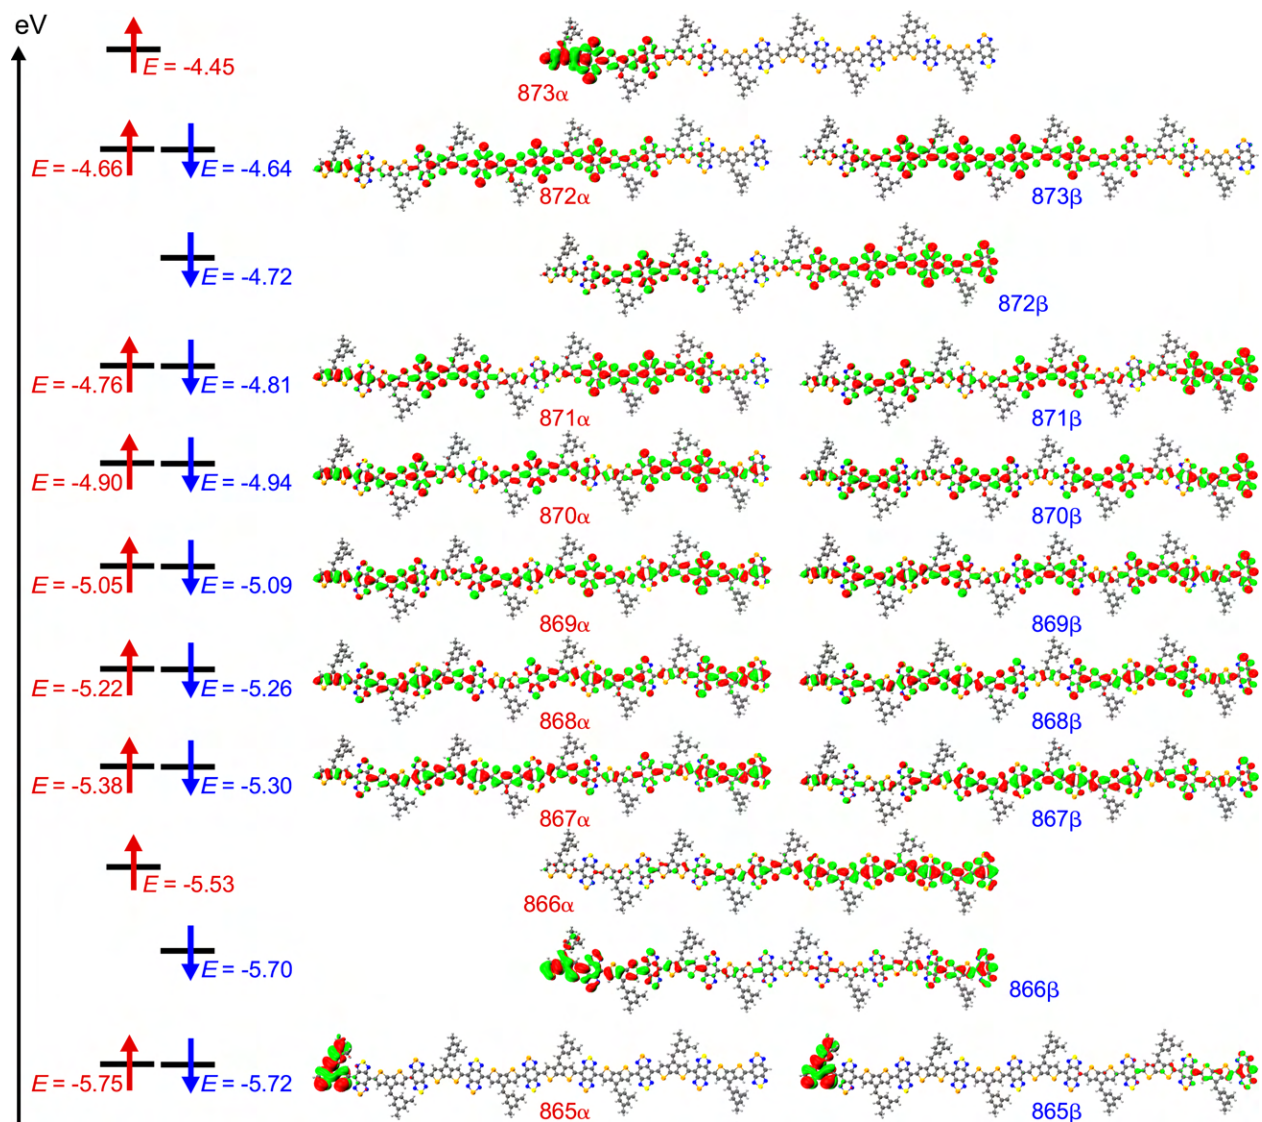

Figure S17: Molecular orbitals (MOs) and their energies at the singlet ( $S = 0$ ) state for CPDS-SeBBT octamer ( $N = 8$ ). The green and red surfaces represent positive and negative contributions of the MOs at an isovalue = 0.01 au.

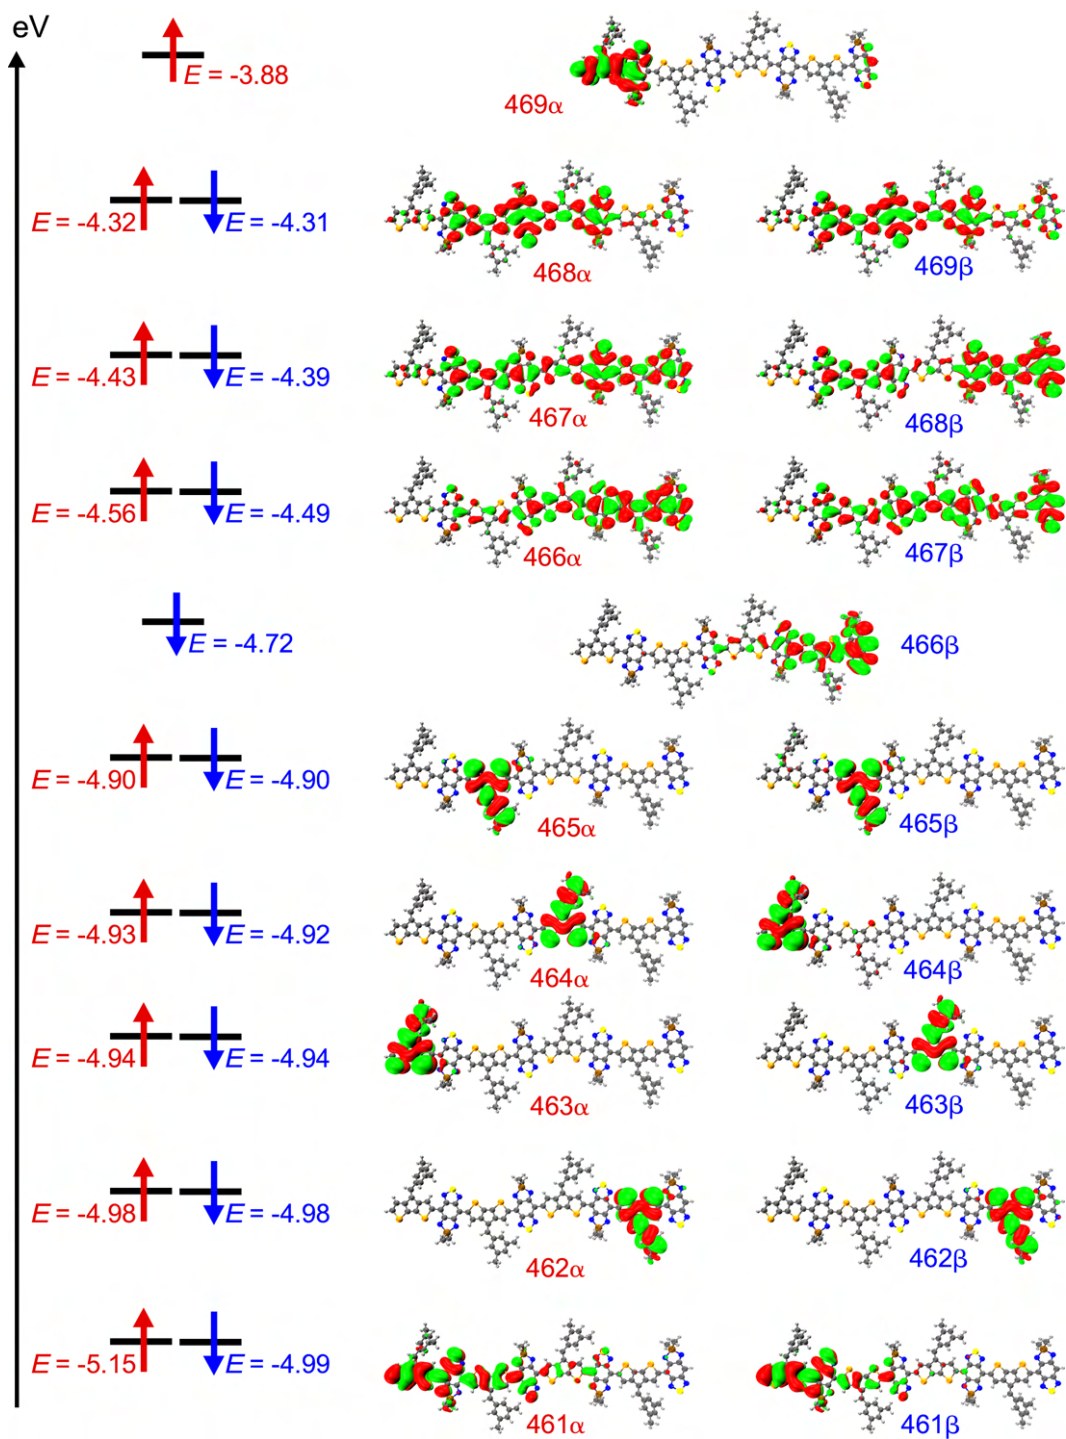

Figure S18: Molecular orbitals (MOs) and their energies at the singlet ( $S = 0$ ) state for CPDS-SiBBT tetramer ( $N = 4$ ) at UBLYP/6-31G(d,p) level of theory and basis set. The green and red surfaces represent positive and negative contributions of the MOs at an isovalue = 0.01 au.

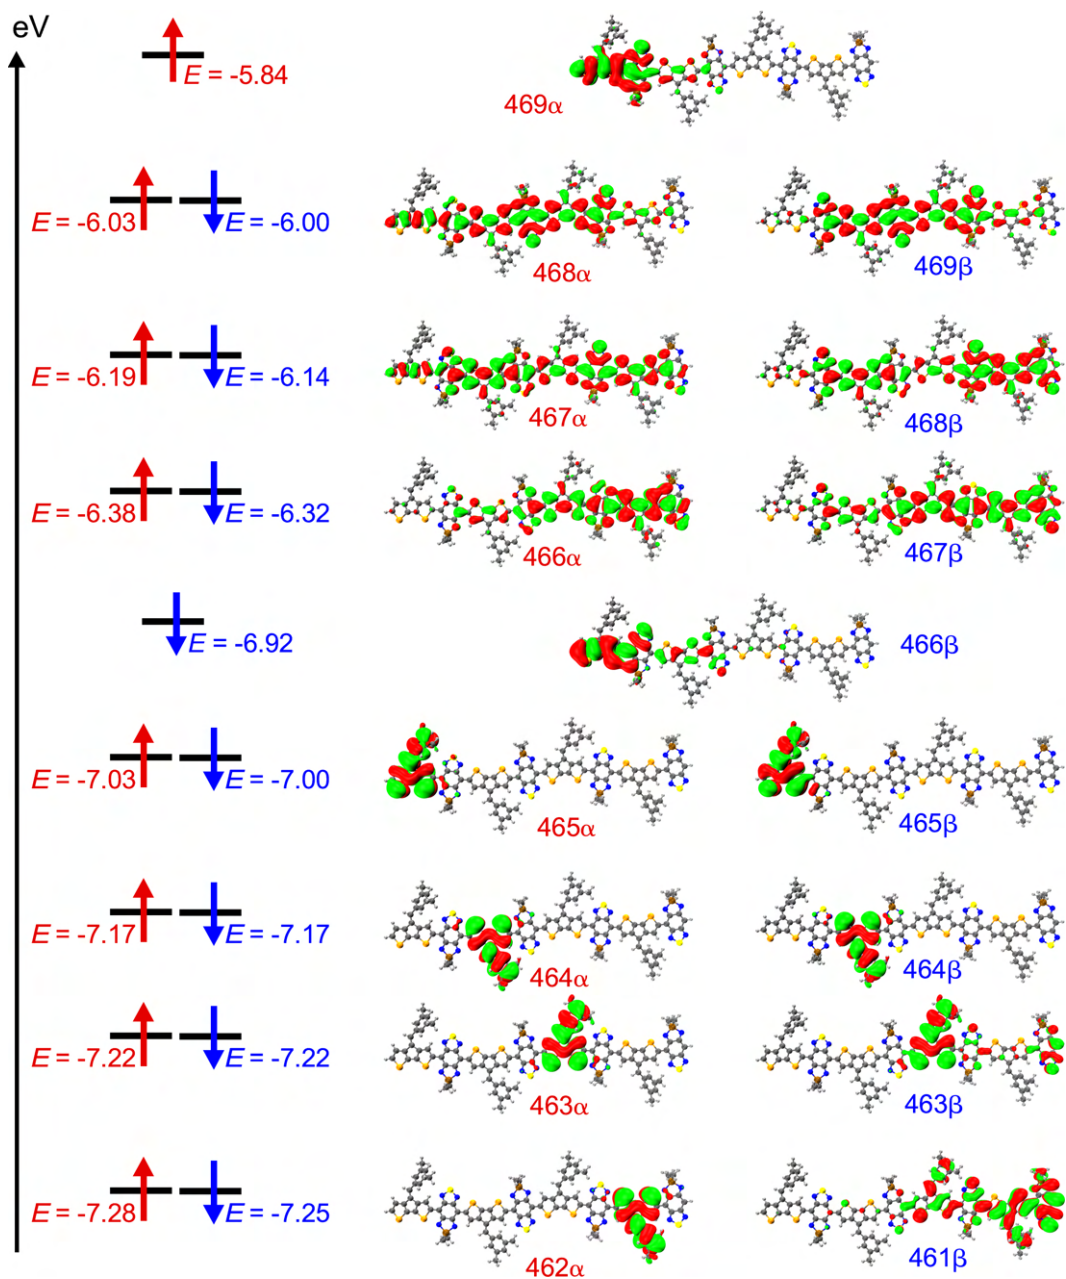

Figure S19: Molecular orbitals (MOs) and their energies at the singlet ( $S = 0$ ) state for CPDS-SiBBT tetramer ( $N = 4$ ) at UCAM-B3LYP/6-31G(d,p) level of theory and basis set. The green and red surfaces represent positive and negative contributions of the MOs at an isovalue = 0.01 au.

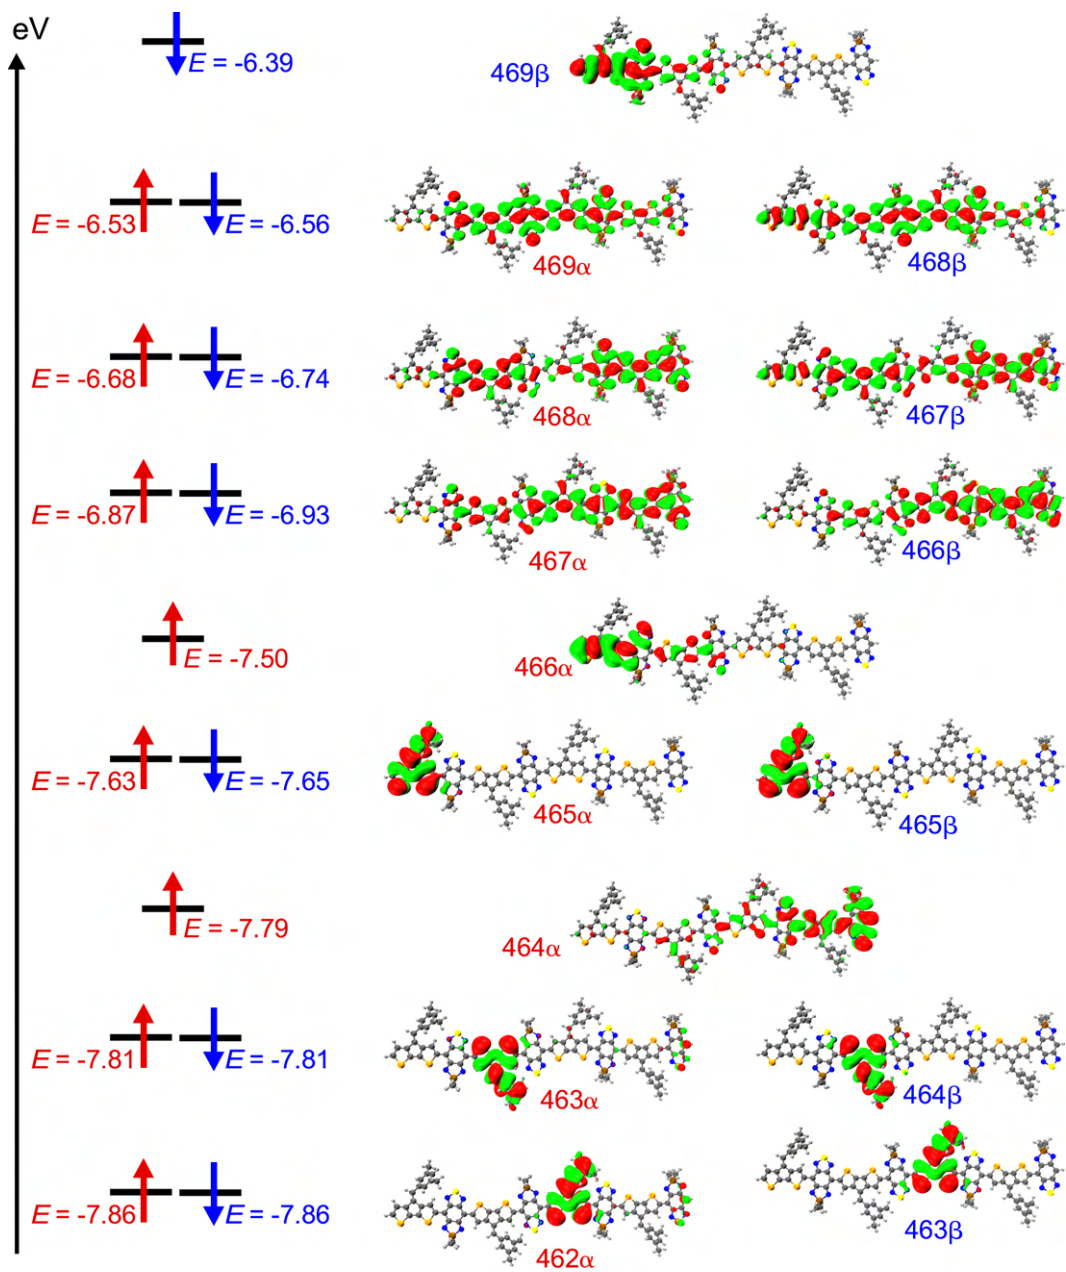

Figure S20: Molecular orbitals (MOs) and their energies at the singlet ( $S = 0$ ) state for CPDS-SiBBT tetramer ( $N = 4$ ) at  $\omega$ B97X-D/6-31G(d,p) level of theory and basis set. The green and red surfaces represent positive and negative contributions of the MOs at an isovalue = 0.01 au.

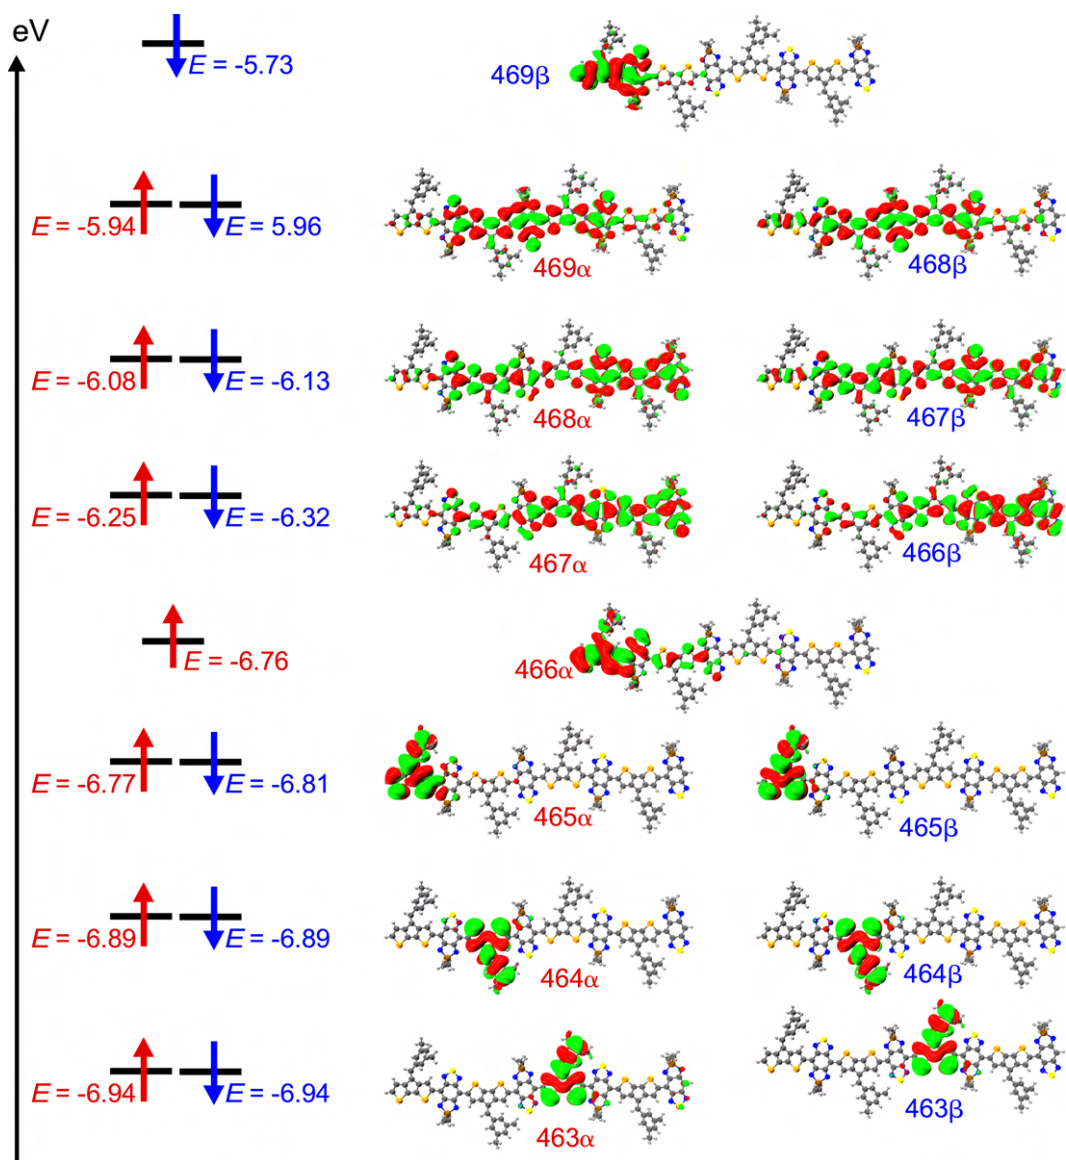

Figure S21: Molecular orbitals (MOs) and their energies at the singlet ( $S = 0$ ) state for CPDS-SiBBT tetramer ( $N = 4$ ) at ULC- $\omega$ HPBE/6-31G(d,p) level of theory and basis set. The green and red surfaces represent positive and negative contributions of the MOs at an isovalue = 0.01 au.



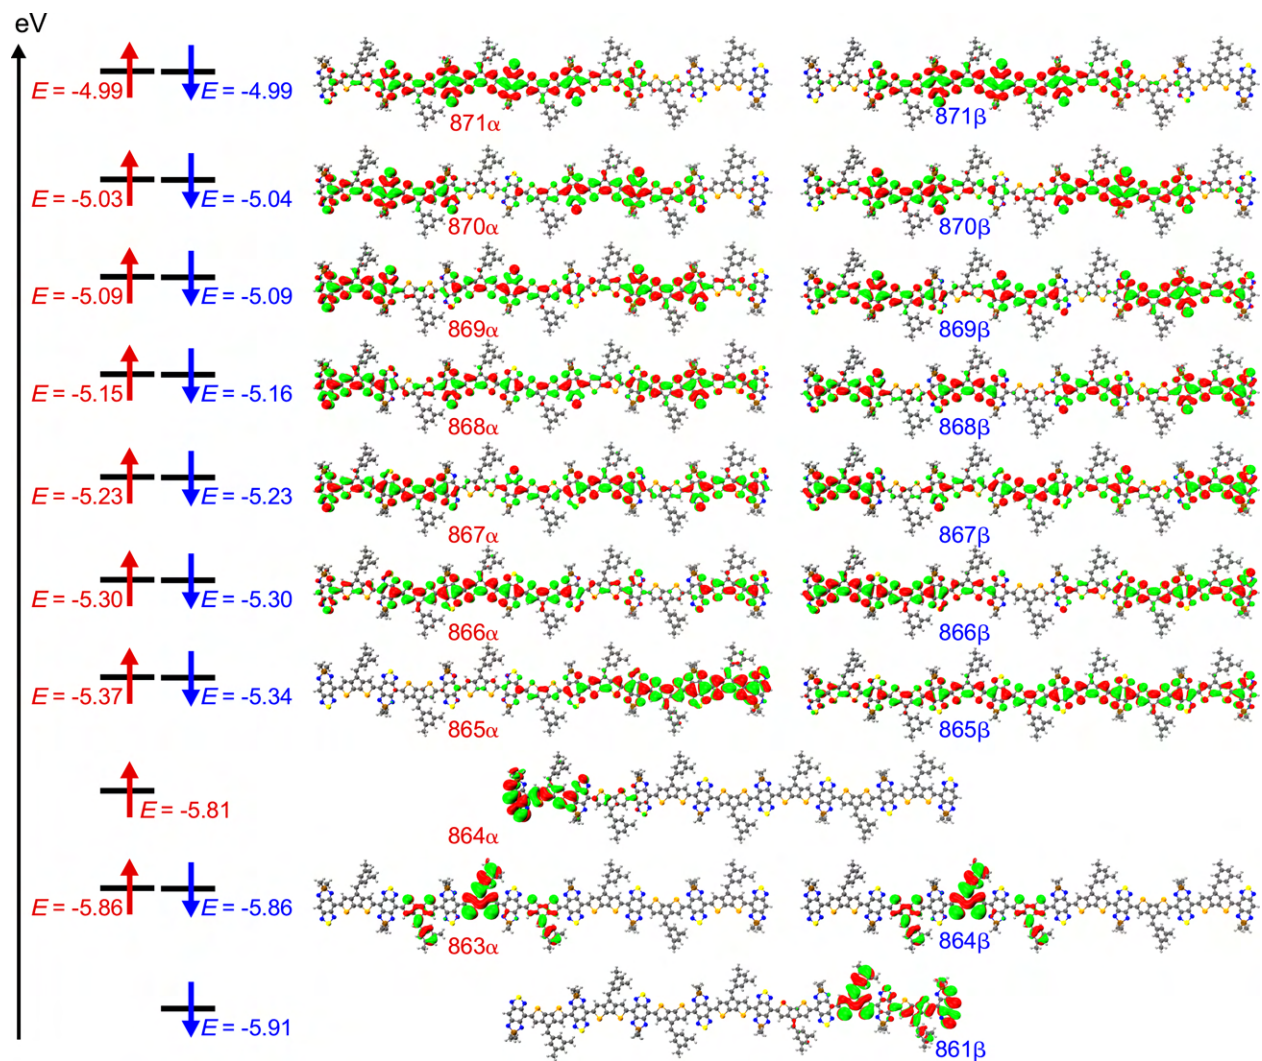

Figure S22: Molecular orbitals (MOs) and their energies at the singlet ( $S = 0$ ) state for CPDS-SiBBT heptamer ( $N = 7$ ) with acceptor end units. The green and red surfaces represent positive and negative contributions of the MOs at an isovalue = 0.01 au.

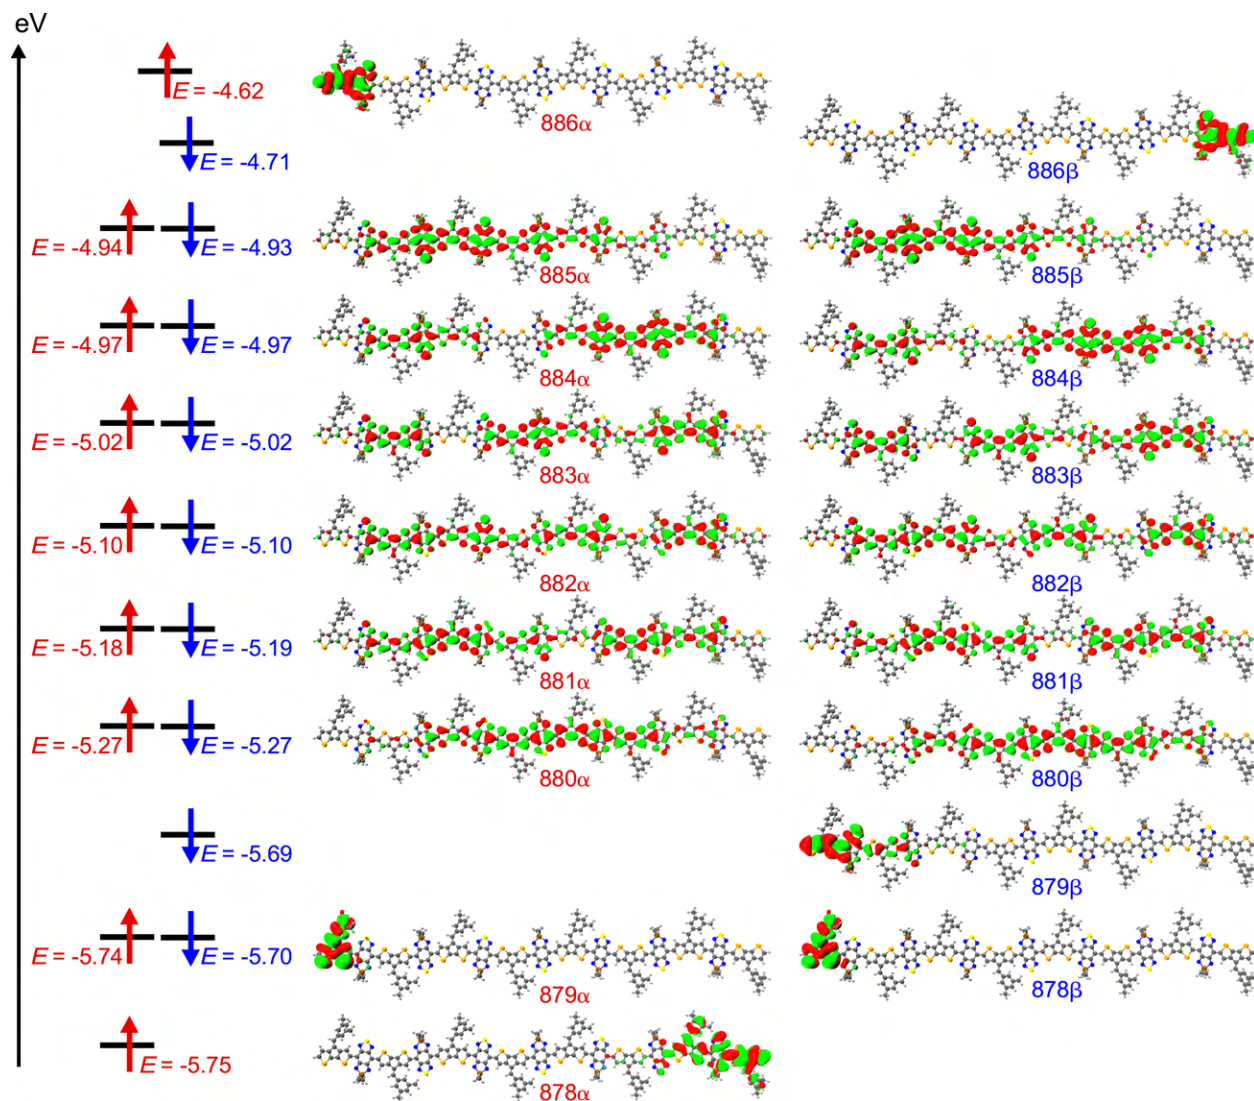

Figure S23: Molecular orbitals (MOs) and their energies at the singlet ( $S = 0$ ) state for CPDS-SiBBT heptamer ( $N = 7$ ) with donor end units. The green and red surfaces represent positive and negative contributions of the MOs at an isovalue = 0.01 au.

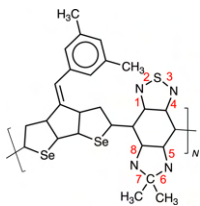

Table S4: Bond lengths of the auxiliary rings of CPDS-CBBT octamer ( $N = 8$ ).

| Repeat Unit 1 |             |             | Repeat Unit 2 |             |             |
|---------------|-------------|-------------|---------------|-------------|-------------|
| Bond Index    | Singlet (Å) | Triplet (Å) | Bond Index    | Singlet (Å) | Triplet (Å) |
| 1             | 1.32922     | 1.32922     | 1             | 1.32556     | 1.32556     |
| 2             | 1.65834     | 1.65835     | 2             | 1.65889     | 1.65888     |
| 3             | 1.66249     | 1.66248     | 3             | 1.66012     | 1.66012     |
| 4             | 1.32391     | 1.32391     | 4             | 1.32489     | 1.32489     |
| 5             | 1.29513     | 1.29512     | 5             | 1.29533     | 1.29533     |
| 6             | 1.46814     | 1.46814     | 6             | 1.46737     | 1.46737     |
| 7             | 1.46764     | 1.46764     | 7             | 1.46856     | 1.46856     |
| 8             | 1.29882     | 1.29882     | 8             | 1.29460     | 1.29460     |
| Repeat Unit 3 |             |             | Repeat Unit 4 |             |             |
| Bond Index    | Singlet (Å) | Triplet (Å) | Bond Index    | Singlet (Å) | Triplet (Å) |
| 1             | 1.32552     | 1.32552     | 1             | 1.32550     | 1.32549     |
| 2             | 1.65877     | 1.65877     | 2             | 1.65874     | 1.65874     |
| 3             | 1.66007     | 1.66007     | 3             | 1.66005     | 1.66005     |
| 4             | 1.32495     | 1.32495     | 4             | 1.32497     | 1.32496     |
| 5             | 1.29537     | 1.29537     | 5             | 1.29537     | 1.29537     |
| 6             | 1.46730     | 1.46730     | 6             | 1.46726     | 1.46726     |
| 7             | 1.46868     | 1.46868     | 7             | 1.46868     | 1.46868     |
| 8             | 1.29450     | 1.29450     | 8             | 1.29446     | 1.29446     |
| Repeat Unit 5 |             |             | Repeat Unit 6 |             |             |
| Bond Index    | Singlet (Å) | Triplet (Å) | Bond Index    | Singlet (Å) | Triplet (Å) |
| 1             | 1.32552     | 1.32552     | 1             | 1.32556     | 1.32555     |
| 2             | 1.65870     | 1.65870     | 2             | 1.65867     | 1.65867     |
| 3             | 1.66002     | 1.66002     | 3             | 1.65995     | 1.65995     |
| 4             | 1.32496     | 1.32496     | 4             | 1.32491     | 1.32492     |
| 5             | 1.29535     | 1.29535     | 5             | 1.29527     | 1.29527     |
| 6             | 1.46728     | 1.46729     | 6             | 1.46733     | 1.46733     |
| 7             | 1.46868     | 1.46868     | 7             | 1.46860     | 1.46860     |
| 8             | 1.29446     | 1.29446     | 8             | 1.29449     | 1.29449     |
| Repeat Unit 7 |             |             | Repeat Unit 8 |             |             |
| Bond Index    | Singlet (Å) | Triplet (Å) | Bond Index    | Singlet (Å) | Triplet (Å) |
| 1             | 1.32574     | 1.32575     | 1             | 1.32514     | 1.32517     |
| 2             | 1.65849     | 1.65849     | 2             | 1.66683     | 1.66681     |
| 3             | 1.65956     | 1.65956     | 3             | 1.64781     | 1.64779     |
| 4             | 1.32480     | 1.32480     | 4             | 1.33875     | 1.33878     |
| 5             | 1.29504     | 1.29504     | 5             | 1.31187     | 1.31188     |
| 6             | 1.46752     | 1.46752     | 6             | 1.46887     | 1.46888     |
| 7             | 1.46837     | 1.46837     | 7             | 1.47550     | 1.47551     |
| 8             | 1.29459     | 1.29459     | 8             | 1.29494     | 1.29493     |

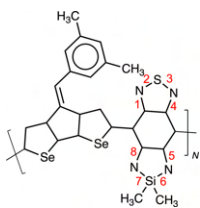

Table S5: Bond lengths of the auxiliary rings of CPDS-SiBBT octamer ( $N = 8$ ).

| Repeat Unit 1 |             |             | Repeat Unit 2 |             |             |
|---------------|-------------|-------------|---------------|-------------|-------------|
| Bond Index    | Singlet (Å) | Triplet (Å) | Bond Index    | Singlet (Å) | Triplet (Å) |
| 1             | 1.32827     | 1.32828     | 1             | 1.32547     | 1.32547     |
| 2             | 1.65833     | 1.65833     | 2             | 1.65907     | 1.65907     |
| 3             | 1.66200     | 1.66200     | 3             | 1.66010     | 1.66010     |
| 4             | 1.32402     | 1.32402     | 4             | 1.32479     | 1.32479     |
| 5             | 1.29543     | 1.29543     | 5             | 1.29523     | 1.29523     |
| 6             | 1.77101     | 1.77101     | 6             | 1.77072     | 1.77072     |
| 7             | 1.77250     | 1.77250     | 7             | 1.77481     | 1.77481     |
| 8             | 1.30146     | 1.30146     | 8             | 1.29742     | 1.29742     |
| Repeat Unit 3 |             |             | Repeat Unit 4 |             |             |
| Bond Index    | Singlet (Å) | Triplet (Å) | Bond Index    | Singlet (Å) | Triplet (Å) |
| 1             | 1.32542     | 1.32542     | 1             | 1.32540     | 1.32540     |
| 2             | 1.65892     | 1.65892     | 2             | 1.65886     | 1.65886     |
| 3             | 1.66005     | 1.66005     | 3             | 1.66002     | 1.66002     |
| 4             | 1.32487     | 1.32487     | 4             | 1.32489     | 1.32489     |
| 5             | 1.29527     | 1.29527     | 5             | 1.29528     | 1.29528     |
| 6             | 1.77048     | 1.77048     | 6             | 1.77042     | 1.77042     |
| 7             | 1.77535     | 1.77535     | 7             | 1.77552     | 1.77552     |
| 8             | 1.29717     | 1.29716     | 8             | 1.29708     | 1.29708     |
| Repeat Unit 5 |             |             | Repeat Unit 6 |             |             |
| Bond Index    | Singlet (Å) | Triplet (Å) | Bond Index    | Singlet (Å) | Triplet (Å) |
| 1             | 1.32541     | 1.32541     | 1             | 1.32545     | 1.32545     |
| 2             | 1.65883     | 1.65883     | 2             | 1.65879     | 1.65879     |
| 3             | 1.65999     | 1.65999     | 3             | 1.65992     | 1.65992     |
| 4             | 1.32488     | 1.32488     | 4             | 1.32485     | 1.32485     |
| 5             | 1.29523     | 1.29524     | 5             | 1.29511     | 1.29511     |
| 6             | 1.77049     | 1.77049     | 6             | 1.77077     | 1.77077     |
| 7             | 1.77553     | 1.77553     | 7             | 1.77542     | 1.77542     |
| 8             | 1.29707     | 1.29707     | 8             | 1.29708     | 1.29708     |
| Repeat Unit 7 |             |             | Repeat Unit 8 |             |             |
| Bond Index    | Singlet (Å) | Triplet (Å) | Bond Index    | Singlet (Å) | Triplet (Å) |
| 1             | 1.32559     | 1.32559     | 1             | 1.32486     | 1.32486     |
| 2             | 1.65865     | 1.65865     | 2             | 1.66866     | 1.66866     |
| 3             | 1.65967     | 1.65967     | 3             | 1.64731     | 1.64731     |
| 4             | 1.32470     | 1.32470     | 4             | 1.33856     | 1.33856     |
| 5             | 1.29468     | 1.29468     | 5             | 1.31206     | 1.31206     |
| 6             | 1.77165     | 1.77165     | 6             | 1.78418     | 1.78418     |
| 7             | 1.77495     | 1.77495     | 7             | 1.78207     | 1.78207     |
| 8             | 1.29718     | 1.29718     | 8             | 1.29780     | 1.29780     |

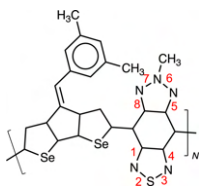

Table S6: Bond lengths of the auxiliary rings of CPDS-NBBT octamer ( $N = 8$ ).

| Repeat Unit 1 |             |             | Repeat Unit 2 |             |             |
|---------------|-------------|-------------|---------------|-------------|-------------|
| Bond Index    | Singlet (Å) | Triplet (Å) | Bond Index    | Singlet (Å) | Triplet (Å) |
| 1             | 1.33412     | 1.33410     | 1             | 1.32841     | 1.32838     |
| 2             | 1.65016     | 1.65021     | 2             | 1.65541     | 1.65547     |
| 3             | 1.65050     | 1.65054     | 3             | 1.65379     | 1.65385     |
| 4             | 1.33107     | 1.33103     | 4             | 1.32867     | 1.32863     |
| 5             | 1.34594     | 1.34591     | 5             | 1.34357     | 1.34353     |
| 6             | 1.32723     | 1.32725     | 6             | 1.32855     | 1.32857     |
| 7             | 1.32938     | 1.32940     | 7             | 1.33138     | 1.33140     |
| 8             | 1.35024     | 1.35021     | 8             | 1.34545     | 1.34540     |
| Repeat Unit 3 |             |             | Repeat Unit 4 |             |             |
| Bond Index    | Singlet (Å) | Triplet (Å) | Bond Index    | Singlet (Å) | Triplet (Å) |
| 1             | 1.32746     | 1.32741     | 1             | 1.32732     | 1.32727     |
| 2             | 1.65622     | 1.65629     | 2             | 1.65632     | 1.65639     |
| 3             | 1.65422     | 1.65428     | 3             | 1.65425     | 1.65432     |
| 4             | 1.32834     | 1.32830     | 4             | 1.32829     | 1.32824     |
| 5             | 1.34321     | 1.34316     | 5             | 1.34317     | 1.34313     |
| 6             | 1.32874     | 1.32877     | 6             | 1.32874     | 1.32877     |
| 7             | 1.33170     | 1.33173     | 7             | 1.33172     | 1.33175     |
| 8             | 1.34470     | 1.34465     | 8             | 1.34457     | 1.34453     |
| Repeat Unit 5 |             |             | Repeat Unit 6 |             |             |
| Bond Index    | Singlet (Å) | Triplet (Å) | Bond Index    | Singlet (Å) | Triplet (Å) |
| 1             | 1.32734     | 1.32730     | 1             | 1.32754     | 1.32750     |
| 2             | 1.65627     | 1.65634     | 2             | 1.65602     | 1.65608     |
| 3             | 1.65414     | 1.65421     | 3             | 1.65366     | 1.65372     |
| 4             | 1.32833     | 1.32828     | 4             | 1.32874     | 1.32870     |
| 5             | 1.34321     | 1.34317     | 5             | 1.34354     | 1.34350     |
| 6             | 1.32866     | 1.32868     | 6             | 1.32835     | 1.32838     |
| 7             | 1.33174     | 1.33177     | 7             | 1.33167     | 1.33170     |
| 8             | 1.34459     | 1.34455     | 8             | 1.34478     | 1.34473     |
| Repeat Unit 7 |             |             | Repeat Unit 8 |             |             |
| Bond Index    | Singlet (Å) | Triplet (Å) | Bond Index    | Singlet (Å) | Triplet (Å) |
| 1             | 1.32854     | 1.32850     | 1             | 1.33588     | 1.33586     |
| 2             | 1.65459     | 1.65465     | 2             | 1.64840     | 1.64844     |
| 3             | 1.65120     | 1.65125     | 3             | 1.63854     | 1.63857     |
| 4             | 1.33159     | 1.33155     | 4             | 1.34783     | 1.34782     |
| 5             | 1.34562     | 1.34559     | 5             | 1.36012     | 1.36011     |
| 6             | 1.32710     | 1.32712     | 6             | 1.32213     | 1.32214     |
| 7             | 1.33098     | 1.33101     | 7             | 1.32923     | 1.32925     |
| 8             | 1.34602     | 1.34598     | 8             | 1.35390     | 1.35387     |

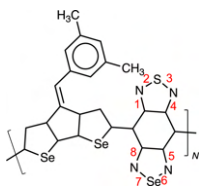

Table S7: Bond lengths of the auxiliary rings of CPDS-SeBBT octamer ( $N = 8$ ).

| Repeat Unit 1 |             |             | Repeat Unit 2 |             |             |
|---------------|-------------|-------------|---------------|-------------|-------------|
| Bond Index    | Singlet (Å) | Triplet (Å) | Bond Index    | Singlet (Å) | Triplet (Å) |
| 1             | 1.33155     | 1.33155     | 1             | 1.32722     | 1.32722     |
| 2             | 1.65451     | 1.65450     | 2             | 1.65552     | 1.65552     |
| 3             | 1.65904     | 1.65903     | 3             | 1.65735     | 1.65735     |
| 4             | 1.32558     | 1.32558     | 4             | 1.32613     | 1.32614     |
| 5             | 1.31854     | 1.31854     | 5             | 1.31888     | 1.31888     |
| 6             | 1.81313     | 1.81313     | 6             | 1.81156     | 1.81156     |
| 7             | 1.81039     | 1.81040     | 7             | 1.81263     | 1.81263     |
| 8             | 1.32276     | 1.32277     | 8             | 1.31816     | 1.31816     |
| Repeat Unit 3 |             |             | Repeat Unit 4 |             |             |
| Bond Index    | Singlet (Å) | Triplet (Å) | Bond Index    | Singlet (Å) | Triplet (Å) |
| 1             | 1.32716     | 1.32716     | 1             | 1.32715     | 1.32715     |
| 2             | 1.65549     | 1.65550     | 2             | 1.65545     | 1.65545     |
| 3             | 1.65733     | 1.65733     | 3             | 1.65729     | 1.65729     |
| 4             | 1.32616     | 1.32616     | 4             | 1.32617     | 1.32617     |
| 5             | 1.31891     | 1.31892     | 5             | 1.31891     | 1.31891     |
| 6             | 1.81152     | 1.81152     | 6             | 1.81148     | 1.81148     |
| 7             | 1.81262     | 1.81263     | 7             | 1.81259     | 1.81259     |
| 8             | 1.31809     | 1.31809     | 8             | 1.31808     | 1.31808     |
| Repeat Unit 5 |             |             | Repeat Unit 6 |             |             |
| Bond Index    | Singlet (Å) | Triplet (Å) | Bond Index    | Singlet (Å) | Triplet (Å) |
| 1             | 1.32718     | 1.32718     | 1             | 1.32726     | 1.32726     |
| 2             | 1.65542     | 1.65542     | 2             | 1.65534     | 1.65534     |
| 3             | 1.65725     | 1.65725     | 3             | 1.65711     | 1.65711     |
| 4             | 1.32614     | 1.32614     | 4             | 1.32606     | 1.32606     |
| 5             | 1.31888     | 1.31889     | 5             | 1.31880     | 1.31880     |
| 6             | 1.81141     | 1.81141     | 6             | 1.81126     | 1.81126     |
| 7             | 1.81254     | 1.81255     | 7             | 1.81246     | 1.81246     |
| 8             | 1.31811     | 1.31811     | 8             | 1.31819     | 1.31819     |
| Repeat Unit 7 |             |             | Repeat Unit 8 |             |             |
| Bond Index    | Singlet (Å) | Triplet (Å) | Bond Index    | Singlet (Å) | Triplet (Å) |
| 1             | 1.32754     | 1.32754     | 1             | 1.32954     | 1.32954     |
| 2             | 1.65511     | 1.65511     | 2             | 1.65925     | 1.65925     |
| 3             | 1.65627     | 1.65628     | 3             | 1.64465     | 1.64466     |
| 4             | 1.32624     | 1.32624     | 4             | 1.34195     | 1.34195     |
| 5             | 1.31908     | 1.31909     | 5             | 1.33731     | 1.33732     |
| 6             | 1.81047     | 1.81047     | 6             | 1.80200     | 1.80200     |
| 7             | 1.81229     | 1.81229     | 7             | 1.82029     | 1.82030     |
| 8             | 1.31843     | 1.31843     | 8             | 1.31965     | 1.31965     |

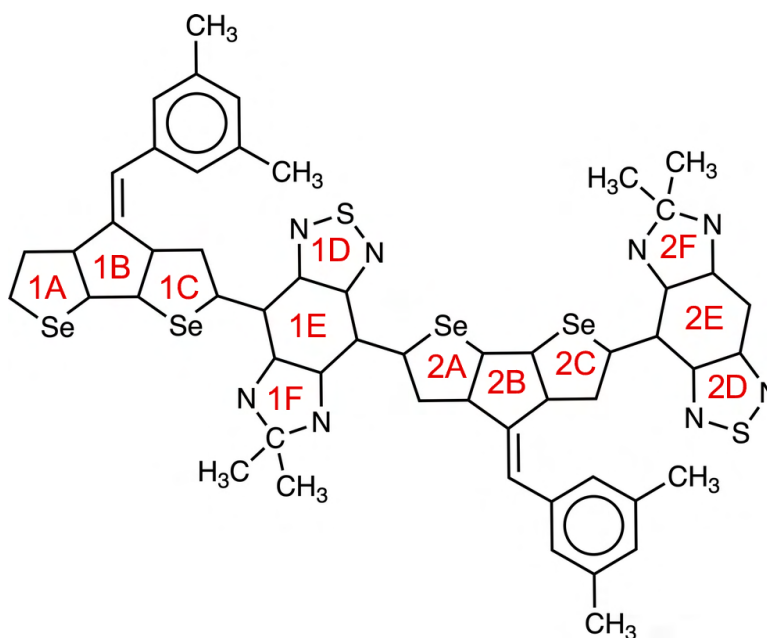

Table S8: Calculated  $\text{NICS}_{\text{iso}}(1)$  (ppm) of CPDS-CBBT dimer ( $N = 2$ ) in the singlet and triplet states.

| Ring index | singlet ( $S = 0$ ) | triplet ( $S = 1$ ) | Ring index | singlet ( $S = 0$ ) | triplet ( $S = 1$ ) |
|------------|---------------------|---------------------|------------|---------------------|---------------------|
| 1A         | -7.1029             | -7.1021             | 2A         | -3.4418             | -3.4277             |
| 1B         | -0.6162             | -0.6263             | 2B         | -1.4897             | -1.4950             |
| 1C         | -4.8502             | -4.8615             | 2C         | -3.4675             | -3.4671             |
| 1D         | -9.0363             | -9.0965             | 2D         | -9.0611             | -9.0607             |
| 1E         | -0.3340             | -0.3752             | 2E         | -0.8937             | -0.8893             |
| 1F         | -5.5152             | -5.4611             | 2F         | -5.6785             | -5.6642             |

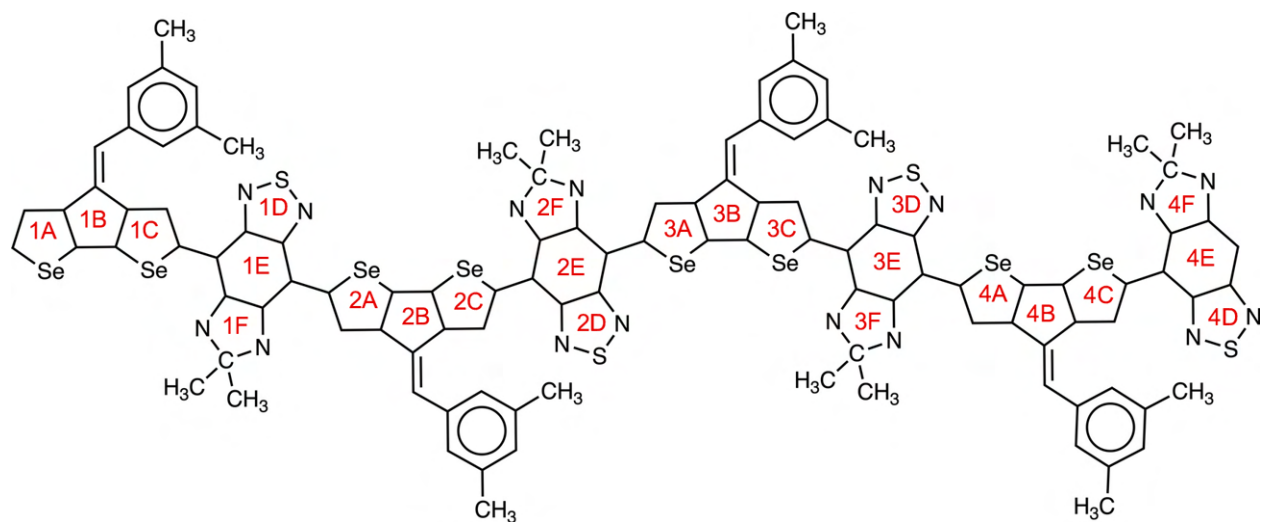

Table S9: Calculated NICS<sub>iso</sub>(1) (ppm) of CPDS-CBBT tetramer ( $N = 4$ ) in the singlet and triplet states.

| Ring index | singlet ( $S = 0$ ) | triplet ( $S = 1$ ) | Ring index | singlet ( $S = 0$ ) | triplet ( $S = 1$ ) |
|------------|---------------------|---------------------|------------|---------------------|---------------------|
| 1A         | -7.0275             | -7.0207             | 2A         | -3.5651             | -3.5641             |
| 1B         | -0.1390             | -0.1365             | 2B         | -2.0258             | -2.0251             |
| 1C         | -4.5249             | -4.5246             | 2C         | -3.8185             | -3.8206             |
| 1D         | -8.9402             | -8.9459             | 2D         | -9.3655             | -9.3569             |
| 1E         | -0.2750             | -0.2777             | 2E         | -0.2577             | -0.2624             |
| 1F         | -5.4331             | -5.4334             | 2F         | -5.4637             | -5.4681             |
| 3A         | -3.4994             | -3.5008             | 4A         | -3.4679             | -3.4709             |
| 3B         | -1.4892             | -1.4878             | 4B         | -1.9996             | -1.9980             |
| 3C         | -3.3760             | -3.3793             | 4C         | -3.8873             | -3.8907             |
| 3D         | -9.2532             | -9.2537             | 4D         | -9.1937             | -9.1851             |
| 3E         | -0.1856             | -0.1883             | 4E         | -0.9377             | -0.9380             |
| 3F         | -5.4238             | -5.4318             | 4F         | -5.6718             | -5.6809             |



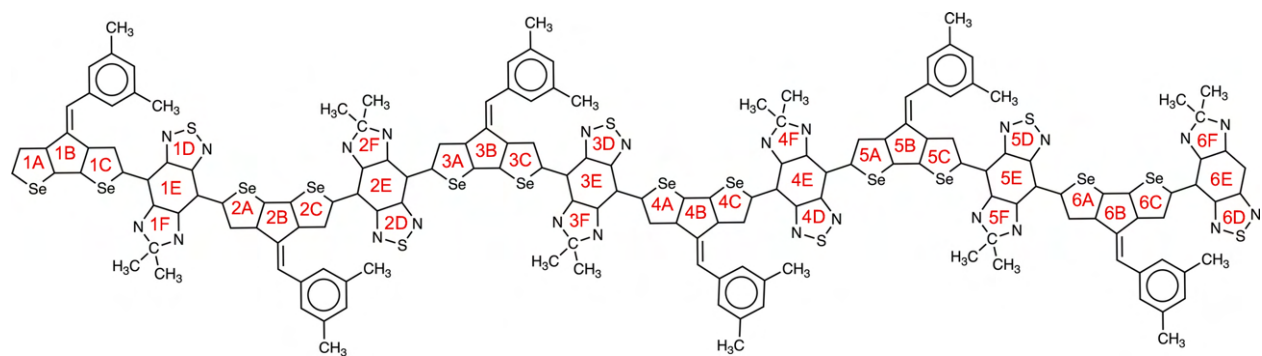

Table S10: Calculated  $\text{NICS}_{\text{iso}}(1)$  (ppm) of CPDS-CBBT hexamer ( $N = 6$ ) in the singlet and triplet states.

| Ring index | singlet ( $S = 0$ ) | triplet ( $S = 1$ ) | Ring index | singlet ( $S = 0$ ) | triplet ( $S = 1$ ) |
|------------|---------------------|---------------------|------------|---------------------|---------------------|
| 1A         | -7.1549             | -7.1622             | 2A         | -3.5320             | -3.5350             |
| 1B         | -0.5328             | -0.5410             | 2B         | -1.4946             | -1.4946             |
| 1C         | -4.9090             | -4.9135             | 2C         | -3.3898             | -3.3891             |
| 1D         | -9.0705             | -9.0705             | 2D         | -9.2272             | -9.2298             |
| 1E         | -0.3775             | -0.3779             | 2E         | -0.1914             | -0.1970             |
| 1F         | -5.4640             | -5.4664             | 2F         | -5.4219             | -5.4231             |
| 3A         | -3.5949             | -3.5921             | 4A         | -3.5260             | -3.5273             |
| 3B         | -2.0036             | -2.0035             | 4B         | -1.4802             | -1.4847             |
| 3C         | -3.7898             | -3.7893             | 4C         | -3.3550             | -3.3557             |
| 3D         | -9.3671             | -9.3678             | 4D         | -9.2378             | -9.2421             |
| 3E         | -0.2516             | -0.2541             | 4E         | -0.1758             | -0.1821             |
| 3F         | -5.4503             | -5.4520             | 4F         | -5.3950             | -5.3974             |
| 5A         | -3.5288             | -3.5303             | 6A         | -3.4270             | -3.4273             |
| 5B         | -2.0016             | -2.0054             | 6B         | -1.4895             | -1.4882             |
| 5C         | -3.7831             | -3.7838             | 6C         | -3.4422             | -3.4424             |
| 5D         | -9.3735             | -9.3721             | 6D         | -9.0718             | -9.0700             |
| 5E         | -0.2460             | -0.2464             | 6E         | -0.8863             | -0.8856             |
| 5F         | -5.4735             | -5.4733             | 6F         | -5.6325             | -5.6320             |

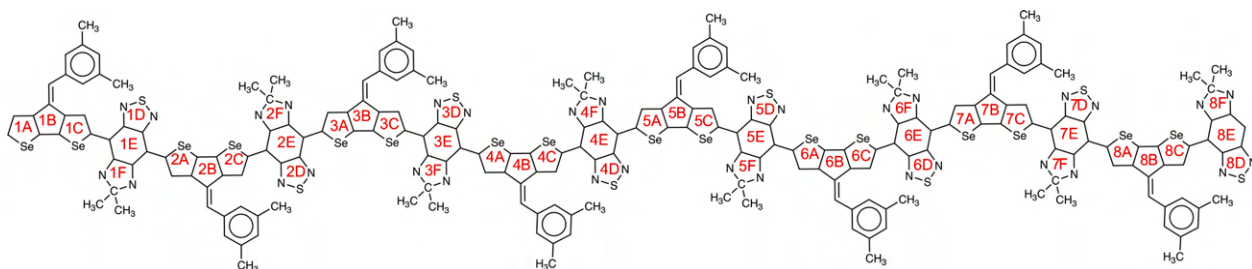

Table S11: Calculated  $\text{NICS}_{\text{iso}}(1)$  (ppm) of CPDS-CBBT octamer ( $N = 8$ ) in the singlet and triplet states.

| Ring index | singlet ( $S = 0$ ) | triplet ( $S = 1$ ) | Ring index | singlet ( $S = 0$ ) | triplet ( $S = 1$ ) |
|------------|---------------------|---------------------|------------|---------------------|---------------------|
| 1A         | -7.0595             | -7.0600             | 2A         | -3.6181             | -3.6161             |
| 1B         | -0.1116             | -0.1084             | 2B         | -2.0120             | -2.0142             |
| 1C         | -4.5490             | -4.5459             | 2C         | -3.7977             | -3.7960             |
| 1D         | -8.9389             | -8.9388             | 2D         | -9.3701             | -9.3716             |
| 1E         | -0.2957             | -0.2905             | 2E         | -0.2698             | -0.2725             |
| 1F         | -5.4801             | -5.4755             | 2F         | -5.4881             | -5.4825             |
| 3A         | -3.5526             | -3.5576             | 4A         | -3.5982             | -3.5997             |
| 3B         | -1.4816             | -1.4849             | 4B         | -2.0052             | -2.0031             |
| 3C         | -3.3728             | -3.3755             | 4C         | -3.7694             | -3.7684             |
| 3D         | -9.2442             | -9.2385             | 4D         | -9.3649             | -9.3612             |
| 3E         | -0.1812             | -0.1810             | 4E         | -0.2549             | -0.2527             |
| 3F         | -5.4267             | -5.4242             | 4F         | -5.4543             | -5.4524             |
| 5A         | -3.5351             | -3.5333             | 6A         | -3.5525             | -3.5534             |
| 5B         | -1.4848             | -1.4827             | 6B         | -2.0035             | -2.0057             |
| 5C         | -3.3402             | -3.3407             | 6C         | -3.7783             | -3.7879             |
| 5D         | -9.2337             | -9.2330             | 6D         | -9.3599             | -9.3547             |
| 5E         | -0.1829             | -0.1780             | 6E         | -0.2473             | -0.2457             |
| 5F         | -5.3958             | -5.3940             | 6F         | -5.4389             | -5.4351             |
| 7A         | -3.4793             | -3.4801             | 8A         | -3.4259             | -3.4247             |
| 7B         | -1.4869             | -1.4921             | 8B         | -2.0013             | -2.0016             |
| 7C         | -3.3408             | -3.3414             | 8C         | -3.8699             | -3.8748             |
| 7D         | -9.2442             | -9.2450             | 8D         | -9.1719             | -9.1664             |
| 7E         | -0.1783             | -0.1787             | 8E         | -0.9566             | -0.9512             |
| 7F         | -5.3880             | -5.3903             | 8F         | -5.6744             | -5.6748             |

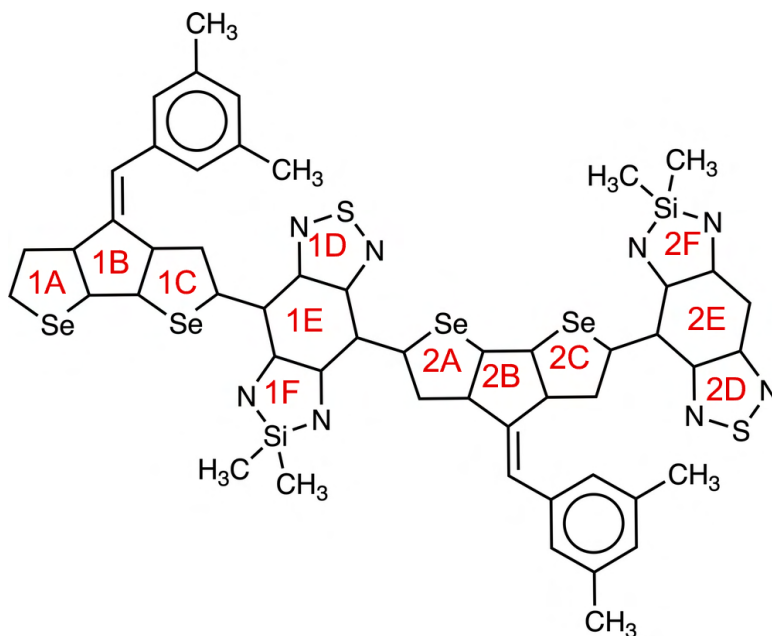

Table S12: Calculated  $\text{NICS}_{\text{iso}}(1)$  (ppm) of CPDS-SiBBT dimer ( $N = 2$ ) in the singlet and triplet states.

| Ring index | singlet ( $S = 0$ ) | triplet ( $S = 1$ ) | Ring index | singlet ( $S = 0$ ) | triplet ( $S = 1$ ) |
|------------|---------------------|---------------------|------------|---------------------|---------------------|
| 1A         | -6.9906             | -6.9880             | 2A         | -3.3728             | -3.3727             |
| 1B         | -0.6016             | -0.6016             | 2B         | -1.5075             | -1.5074             |
| 1C         | -4.1456             | -4.1496             | 2C         | -3.0227             | -3.0243             |
| 1D         | -9.0021             | -9.0376             | 2D         | -8.7546             | -8.7229             |
| 1E         | 0.3689              | 0.3319              | 2E         | 0.3704              | 0.3993              |
| 1F         | -2.9289             | -2.9316             | 2F         | -2.8343             | -2.8282             |

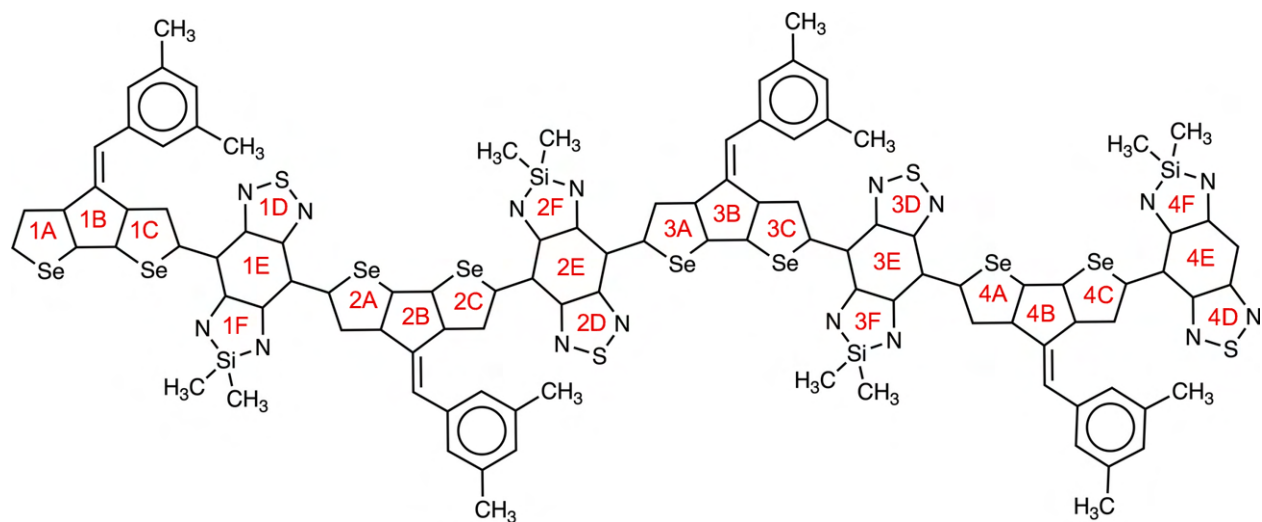

Table S13: Calculated  $\text{NICS}_{\text{iso}}(1)$  of CPDS-SiBBT tetramer ( $N = 4$ ) in the singlet and triplet states.

| Ring index | singlet ( $S = 0$ ) | triplet ( $S = 1$ ) | Ring index | singlet ( $S = 0$ ) | triplet ( $S = 1$ ) |
|------------|---------------------|---------------------|------------|---------------------|---------------------|
| 1A         | -7.0441             | -7.0374             | 2A         | -3.4372             | -3.4367             |
| 1B         | -0.5585             | -0.5620             | 2B         | -1.4750             | -1.4763             |
| 1C         | -4.1853             | -4.1863             | 2C         | -2.8886             | -2.8868             |
| 1D         | -9.0252             | -9.0248             | 2D         | -9.1552             | -9.1551             |
| 1E         | 0.3342              | 0.3348              | 2E         | 0.4218              | 0.4237              |
| 1F         | -2.8994             | -2.9002             | 2F         | -2.8252             | -2.8244             |
| 3A         | -3.4588             | -3.4562             | 4A         | -3.3770             | -3.3774             |
| 3B         | -1.9995             | -2.0033             | 4B         | -1.4855             | -1.4843             |
| 3C         | -3.3201             | -3.3196             | 4C         | -2.9759             | -2.9755             |
| 3D         | -9.3133             | -9.3134             | 4D         | -8.7702             | -8.7709             |
| 3E         | 0.3531              | 0.3524              | 4E         | 0.3888              | 0.3905              |
| 3F         | -2.8989             | -2.8987             | 4F         | -2.8535             | -2.8515             |

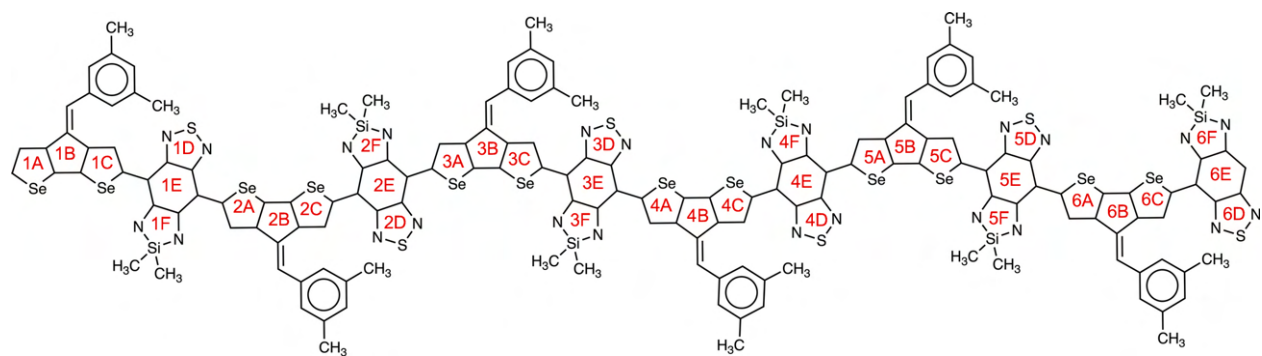

Table S14: Calculated  $\text{NICS}_{\text{iso}}(1)$  (ppm) of CPDS-SiBBT hexamer ( $N = 6$ ) in the singlet and triplet states.

| Ring index | singlet ( $S = 0$ ) | triplet ( $S = 1$ ) | Ring index | singlet ( $S = 0$ ) | triplet ( $S = 1$ ) |
|------------|---------------------|---------------------|------------|---------------------|---------------------|
| 1A         | -7.0694             | -6.9663             | 2A         | -3.4533             | -3.5023             |
| 1B         | -0.5624             | -0.1254             | 2B         | -1.4785             | -2.0219             |
| 1C         | -4.1698             | -3.7545             | 2C         | -2.8712             | -3.3164             |
| 1D         | -9.0255             | -8.8924             | 2D         | -9.1388             | -9.2758             |
| 1E         | 0.3287              | 0.4185              | 2E         | 0.4182              | 0.3367              |
| 1F         | -2.9105             | -2.8559             | 2F         | -2.8283             | -2.8756             |
| 3A         | -3.4961             | -3.4576             | 4A         | -3.4584             | -3.4832             |
| 3B         | -1.9981             | -1.4522             | 4B         | -1.4615             | -1.9959             |
| 3C         | -3.2851             | -2.8262             | 4C         | -2.8265             | -3.2949             |
| 3D         | -9.2913             | -10.3233            | 4D         | -9.1614             | -9.2871             |
| 3E         | 0.3398              | 0.4245              | 4E         | 0.4350              | 0.3526              |
| 3F         | -2.8716             | -2.8216             | 4F         | -2.8172             | -2.8634             |
| 5A         | -3.4517             | -3.4328             | 6A         | -3.3611             | -3.3667             |
| 5B         | -2.0011             | -1.4648             | 6B         | -1.4876             | -2.0154             |
| 5C         | -3.3081             | -2.8365             | 6C         | -2.9639             | -3.4390             |
| 5D         | -9.2976             | -9.1780             | 6D         | -8.7826             | -8.8806             |
| 5E         | 0.8887              | 0.4384              | 6E         | 0.3699              | 0.3040              |
| 5F         | -2.8905             | -2.8511             | 6F         | -2.8781             | -2.9015             |

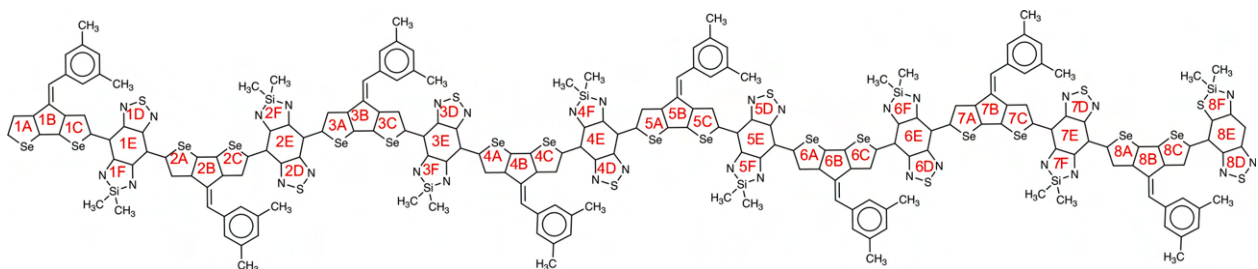

Table S15: Calculated  $\text{NICS}_{\text{iso}}(1)$  (ppm) of CPDS-SiBBT octamer ( $N = 8$ ) in the singlet and triplet states.

| Ring index | singlet ( $S = 0$ ) | triplet ( $S = 1$ ) | Ring index | singlet ( $S = 0$ ) | triplet ( $S = 1$ ) |
|------------|---------------------|---------------------|------------|---------------------|---------------------|
| 1A         | -7.0801             | -7.0792             | 2A         | -3.4668             | -3.4678             |
| 1B         | -0.5603             | -0.5604             | 2B         | -1.4819             | -1.4780             |
| 1C         | -4.1476             | -4.1489             | 2C         | -2.8724             | -2.8691             |
| 1D         | -9.0301             | -9.0332             | 2D         | -9.1402             | -9.1404             |
| 1E         | 0.3217              | 0.3195              | 2E         | 0.4187              | 0.4122              |
| 1F         | -2.9145             | -2.9146             | 2F         | -2.8349             | -2.8365             |
| 3A         | -3.5158             | -3.5173             | 4A         | -3.4786             | -3.4756             |
| 3B         | -2.0033             | -2.0038             | 4B         | -1.4537             | -1.4536             |
| 3C         | -3.2769             | -3.2749             | 4C         | -2.8050             | -2.8053             |
| 3D         | -9.2946             | -9.2927             | 4D         | -9.1524             | -9.1574             |
| 3E         | 0.3318              | 0.3329              | 4E         | 0.4273              | 0.4242              |
| 3F         | -2.8716             | -2.8696             | 4F         | -2.8235             | -2.8234             |
| 5A         | -3.4985             | -3.4987             | 6A         | -3.4598             | -3.4645             |
| 5B         | -1.9941             | -1.9938             | 6B         | -1.4605             | -1.4613             |
| 5C         | -3.2649             | -3.2650             | 6C         | -2.8168             | -2.8184             |
| 5D         | -9.2825             | -9.2867             | 6D         | -9.1613             | -9.1612             |
| 5E         | 0.3447              | 0.3461              | 6E         | 0.4381              | 0.4392              |
| 5F         | -2.8711             | -2.8706             | 6F         | -2.8141             | -2.8125             |
| 7A         | -3.4368             | -3.4351             | 8A         | -3.3566             | -3.3614             |
| 7B         | -1.9949             | -1.9931             | 8B         | -1.4906             | -1.4932             |
| 7C         | -3.3113             | -3.3068             | 8C         | -2.9641             | -2.9612             |
| 7D         | -9.2964             | -9.2977             | 8D         | -8.7831             | -8.7791             |
| 7E         | 0.3596              | 0.3595              | 8E         | 0.3650              | 0.3627              |
| 7F         | -2.8842             | -2.8840             | 8F         | -2.9031             | -2.9053             |

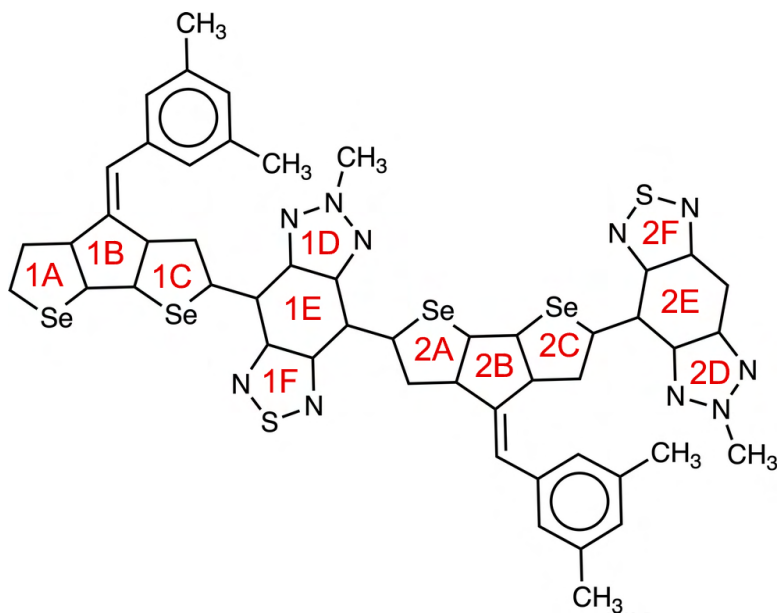

Table S16: Calculated  $\text{NICS}_{\text{iso}}(1)$  (ppm) of CPDS-NBBT dimer ( $N = 2$ ) in the singlet and triplet states.

| Ring index | singlet ( $S = 0$ ) | triplet ( $S = 1$ ) | Ring index | singlet ( $S = 0$ ) | triplet ( $S = 1$ ) |
|------------|---------------------|---------------------|------------|---------------------|---------------------|
| 1A         | -7.3675             | -7.0998             | 2A         | -5.1534             | -3.8109             |
| 1B         | 0.0341              | -0.2406             | 2B         | -0.1901             | -1.0769             |
| 1C         | -5.8014             | -5.3262             | 2C         | -5.1755             | -4.1698             |
| 1D         | -12.2704            | -11.0936            | 2D         | -12.8503            | -12.0539            |
| 1E         | -6.2482             | -1.8055             | 2E         | -8.7026             | -5.9152             |
| 1F         | -12.2188            | -9.4115             | 2F         | -12.9600            | -11.3093            |

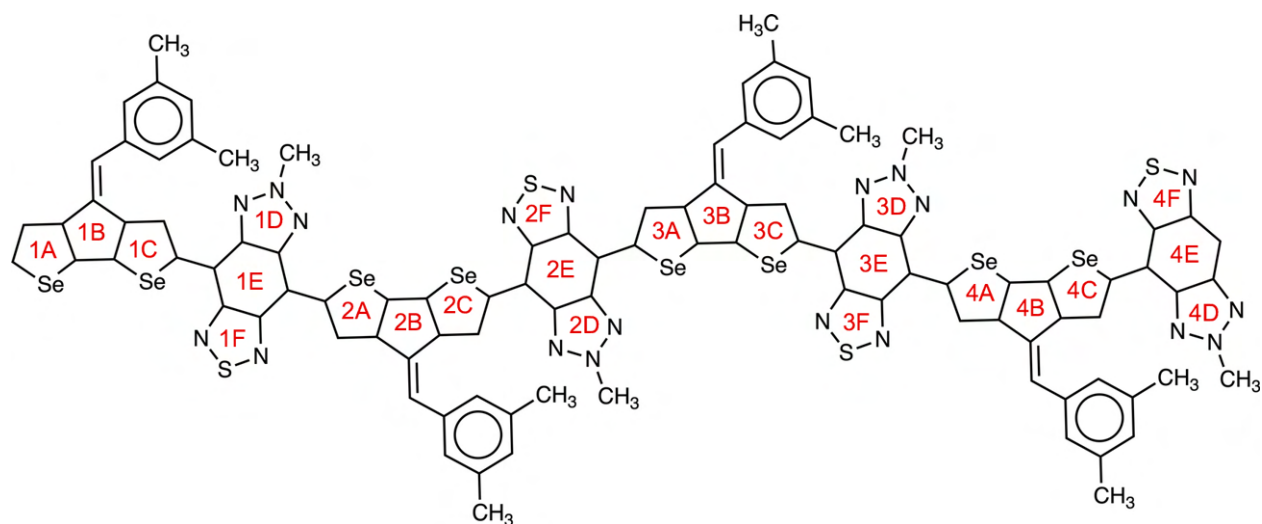

Table S17: Calculated  $\text{NICS}_{\text{iso}}(1)$  (ppm) of CPDS-NBBT tetramer ( $N = 4$ ) in the singlet and triplet states.

| Ring index | singlet ( $S = 0$ ) | triplet ( $S = 1$ ) | Ring index | singlet ( $S = 0$ ) | triplet ( $S = 1$ ) |
|------------|---------------------|---------------------|------------|---------------------|---------------------|
| 1A         | -7.3132             | -7.2806             | 2A         | -4.2485             | -4.0231             |
| 1B         | -0.0387             | -0.0597             | 2B         | -0.9602             | -1.1369             |
| 1C         | -5.6722             | -5.6207             | 2C         | -4.1431             | -3.9221             |
| 1D         | -11.7753            | -11.6415            | 2D         | -11.4075            | -11.2786            |
| 1E         | -4.0498             | -3.5085             | 2E         | -2.6816             | -1.9923             |
| 1F         | -10.9784            | -10.6481            | 2F         | -10.4970            | -10.1020            |
| 3A         | -4.1509             | -3.8973             | 4A         | -4.5634             | -4.3871             |
| 3B         | -1.5980             | -1.8241             | 4B         | -0.6239             | -0.7476             |
| 3C         | -4.5109             | -4.2857             | 4C         | -4.7724             | -4.6510             |
| 3D         | -11.6452            | -11.5003            | 4D         | -12.5545            | -12.4673            |
| 3E         | -3.2354             | -2.6041             | 4E         | -7.4612             | -7.1359             |
| 3F         | -10.6837            | -10.3255            | 4F         | -12.2621            | -12.0764            |



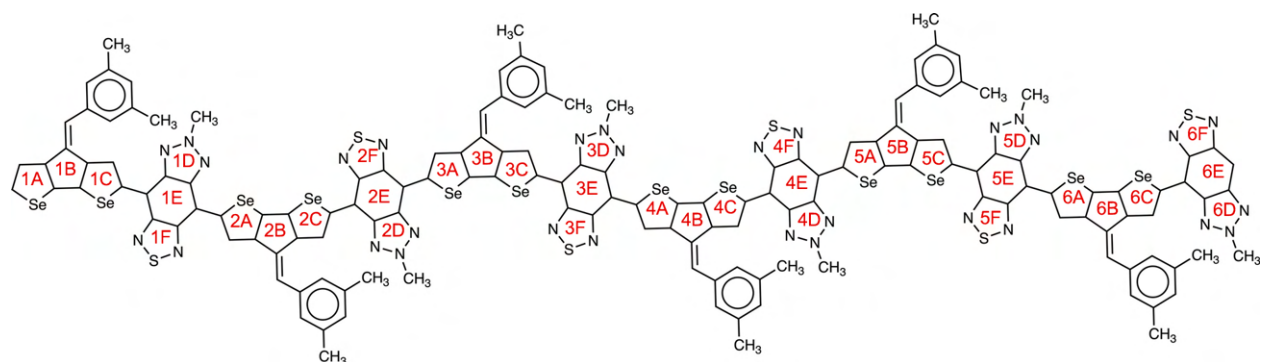

Table S18: Calculated  $\text{NICS}_{\text{iso}}(1)$  (ppm) of CPDS-NBBT hexamer ( $N = 6$ ) in the singlet and triplet states.

| Ring index | singlet ( $S = 0$ ) | triplet ( $S = 1$ ) | Ring index | singlet ( $S = 0$ ) | triplet ( $S = 1$ ) |
|------------|---------------------|---------------------|------------|---------------------|---------------------|
| 1A         | -7.2808             | -7.2805             | 2A         | -4.1540             | -4.1272             |
| 1B         | -0.0607             | -0.0599             | 2B         | -1.0412             | -1.0689             |
| 1C         | -5.6377             | -5.6281             | 2C         | -4.0249             | -3.9949             |
| 1D         | -11.7263            | -11.7064            | 2D         | -11.3269            | -11.3093            |
| 1E         | -3.8133             | -3.7332             | 2E         | -2.3099             | -2.2121             |
| 1F         | -10.8256            | -10.7748            | 2F         | -10.2878            | -10.2375            |
| 3A         | -3.9987             | -3.9612             | 4A         | -3.8847             | -3.8431             |
| 3B         | -1.7896             | -1.8227             | 4B         | -1.2866             | -1.3186             |
| 3C         | -4.2799             | -4.2485             | 4C         | -3.8517             | -3.8155             |
| 3D         | -11.5117            | -11.4891            | 4D         | -11.3477            | -11.3365            |
| 3E         | -2.2543             | -2.1503             | 4E         | -2.1799             | -2.0752             |
| 3F         | -10.2813            | -10.2238            | 4F         | -10.2718            | -10.2198            |
| 5A         | -3.9984             | -3.9669             | 6A         | -4.4912             | -4.4704             |
| 5B         | -1.7298             | -1.7598             | 6B         | -0.6917             | -0.7080             |
| 5C         | -4.4214             | -4.3925             | 6C         | -4.7397             | -4.7142             |
| 5D         | -11.5902            | -11.5782            | 6D         | -12.5116            | -12.5108            |
| 5E         | -2.9301             | -2.8541             | 6E         | -7.3704             | -7.3235             |
| 5F         | -10.5341            | -10.4818            | 6F         | -12.2027            | -12.1649            |

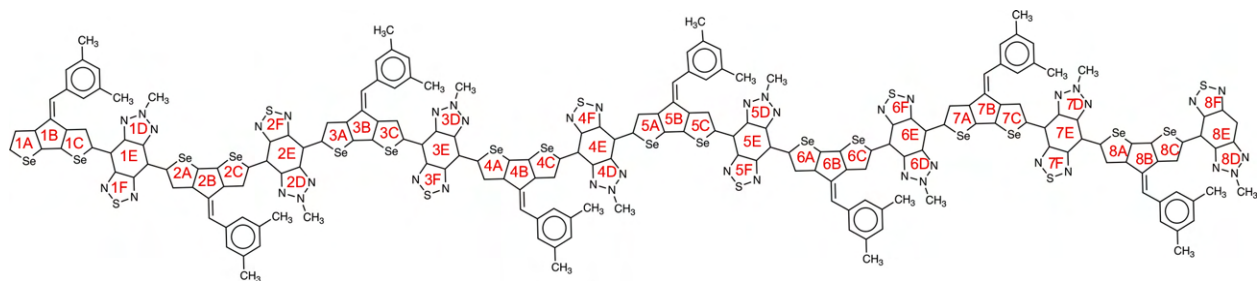

Table S19: Calculated  $\text{NICS}_{\text{iso}}(1)$  (ppm) of CPDS-NBBT octamer ( $N = 8$ ) in the singlet and triplet states.

| Ring index | singlet ( $S = 0$ ) | triplet ( $S = 1$ ) | Ring index | singlet ( $S = 0$ ) | triplet ( $S = 1$ ) |
|------------|---------------------|---------------------|------------|---------------------|---------------------|
| 1A         | -7.2768             | -7.2837             | 2A         | -4.1407             | -4.1351             |
| 1B         | -0.0719             | -0.0765             | 2B         | -1.0455             | -1.0492             |
| 1C         | -5.6295             | -5.6315             | 2C         | -3.9880             | -3.9814             |
| 1D         | -11.7364            | -11.7288            | 2D         | -11.3160            | -11.3052            |
| 1E         | -3.7883             | -3.7737             | 2E         | -2.2707             | -2.2538             |
| 1F         | -10.7974            | -10.7920            | 2F         | -10.2553            | -10.2522            |
| 3A         | -3.9990             | -3.9941             | 4A         | -3.8665             | -3.8596             |
| 3B         | -1.8093             | -1.8164             | 4B         | -1.3136             | -1.3190             |
| 3C         | -4.2368             | -4.2380             | 4C         | -3.7924             | -3.7845             |
| 3D         | -11.5010            | -11.5068            | 4D         | -11.3173            | -11.3165            |
| 3E         | -2.1915             | -2.1762             | 4E         | -2.0165             | -1.9995             |
| 3F         | -10.2346            | -10.2251            | 4F         | -10.2016            | -10.1910            |
| 5A         | -3.9293             | -3.9302             | 6A         | -3.8712             | -3.8577             |
| 5B         | -1.8554             | -1.8604             | 6B         | -1.3145             | -1.3197             |
| 5C         | -4.2429             | -4.2405             | 6C         | -3.8357             | -3.8266             |
| 5D         | -11.5102            | -11.5112            | 6D         | -11.3485            | -11.3430            |
| 5E         | -2.1668             | -2.1478             | 6E         | -2.1299             | -2.1168             |
| 5F         | -10.2494            | -10.2439            | 6F         | -10.2545            | -10.2398            |
| 7A         | -3.9757             | -3.9738             | 8A         | -4.4699             | -4.4707             |
| 7B         | -1.7427             | -1.7460             | 8B         | -0.7048             | -0.7018             |
| 7C         | -4.4314             | -4.4316             | 8C         | -4.7364             | -4.7345             |
| 7D         | -11.6083            | -11.6133            | 8D         | -12.5074            | -12.5099            |
| 7E         | -2.9022             | -2.8970             | 8E         | -7.3377             | -7.3519             |
| 7F         | -10.5166            | -10.5110            | 8F         | -12.1823            | -12.1771            |

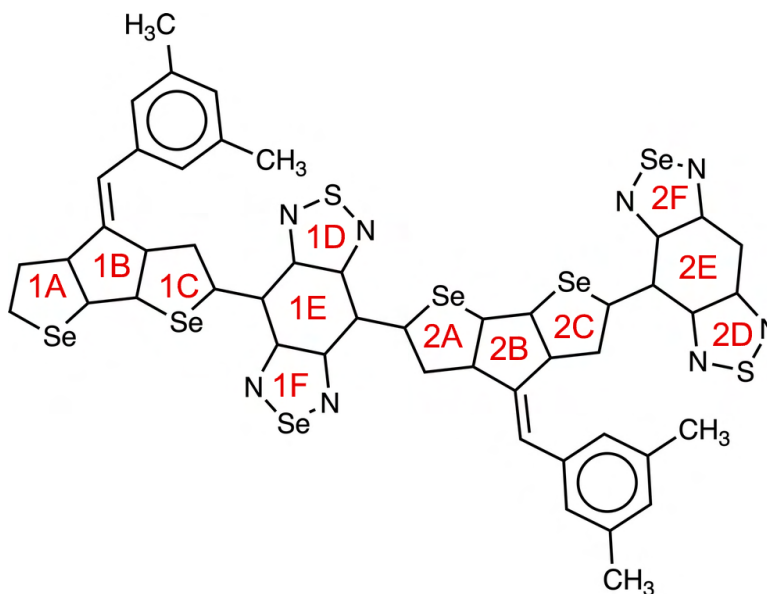

Table S20: Calculated  $\text{NICS}_{\text{iso}}(1)$  (ppm) of CPDS-SeBBT dimer ( $N = 2$ ) in the singlet and triplet states.

| Ring index | singlet ( $S = 0$ ) | triplet ( $S = 1$ ) | Ring index | singlet ( $S = 0$ ) | triplet ( $S = 1$ ) |
|------------|---------------------|---------------------|------------|---------------------|---------------------|
| 1A         | -7.1044             | -7.0596             | 2A         | -3.5023             | -3.3597             |
| 1B         | -0.4674             | -0.5090             | 2B         | -1.1993             | -1.2890             |
| 1C         | -4.8710             | -4.8683             | 2C         | -3.5612             | -3.4377             |
| 1D         | -9.8487             | -9.4314             | 2D         | -10.4939            | -10.3167            |
| 1E         | -1.6298             | -1.0642             | 2E         | -3.5126             | -3.1268             |
| 1F         | -9.6049             | -9.0452             | 2F         | -9.9291             | -9.6486             |

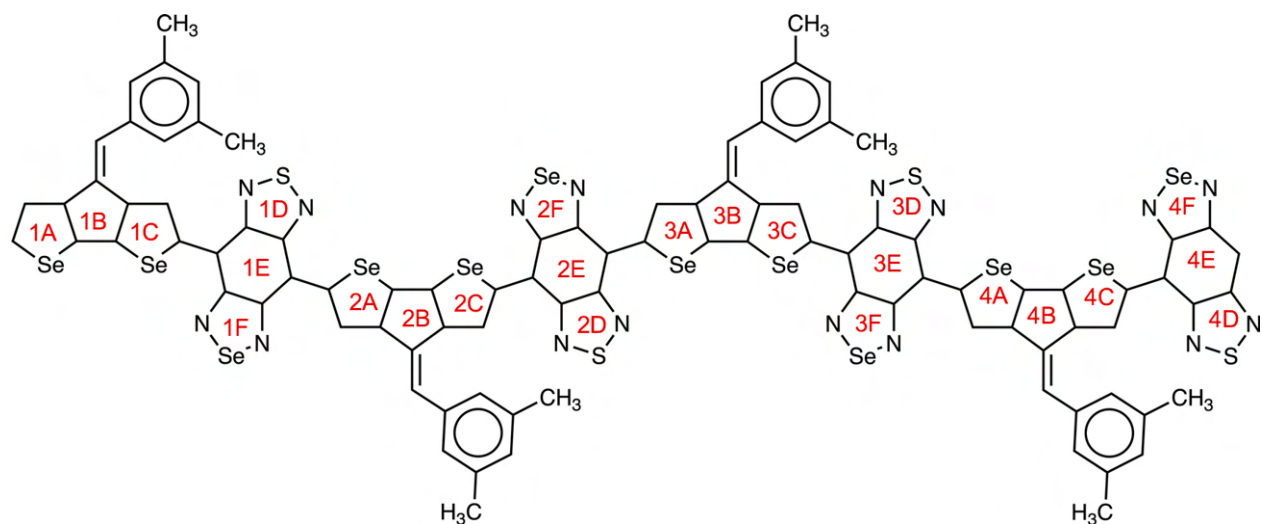

Table S21: Calculated NICS<sub>iso</sub>(1) (ppm) of CPDS-SeBBT tetramer ( $N = 4$ ) in the singlet and triplet states.

| Ring index | singlet ( $S = 0$ ) | triplet ( $S = 1$ ) | Ring index | singlet ( $S = 0$ ) | triplet ( $S = 1$ ) |
|------------|---------------------|---------------------|------------|---------------------|---------------------|
| 1A         | -7.0540             | -7.0566             | 2A         | -3.4910             | -3.4914             |
| 1B         | -0.0204             | -0.0243             | 2B         | -1.8702             | -1.8675             |
| 1C         | -4.5280             | -4.5264             | 2C         | -3.7381             | -3.7370             |
| 1D         | -9.4703             | -9.4698             | 2D         | -9.7382             | -9.7379             |
| 1E         | -1.2087             | -1.2129             | 2E         | -0.8816             | -0.8704             |
| 1F         | -9.1912             | -9.1904             | 2F         | -9.3308             | -9.3297             |
| 3A         | -3.4438             | -3.4391             | 4A         | -3.4745             | -3.4741             |
| 3B         | -1.3522             | -1.3555             | 4B         | -1.7526             | -1.7547             |
| 3C         | -3.3024             | -3.3039             | 4C         | -3.9660             | -3.9632             |
| 3D         | -9.6494             | -9.6475             | 4D         | -10.5312            | -10.5253            |
| 3E         | -0.8793             | -0.8813             | 4E         | -3.3846             | -3.3698             |
| 3F         | -9.3169             | -9.3175             | 4F         | -9.8601             | -9.8566             |

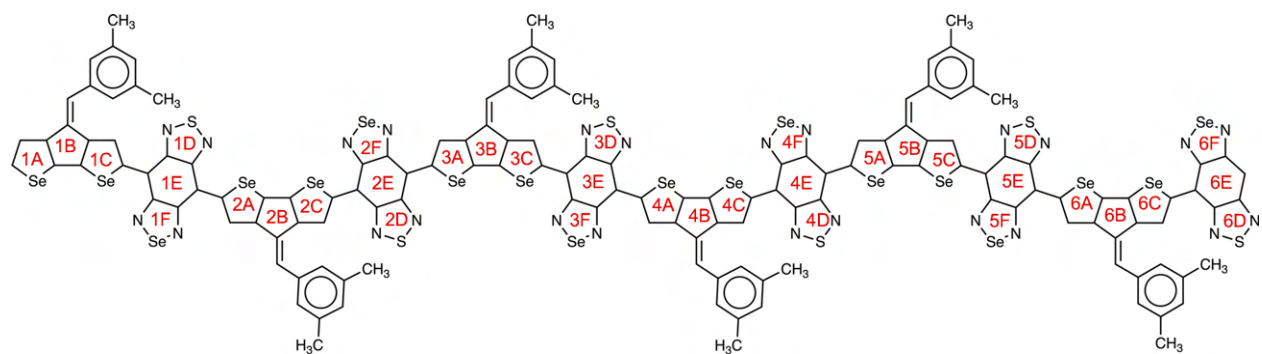

Table S22: Calculated  $\text{NICS}_{\text{iso}}(1)$  (ppm) of CPDS-SeBBT hexamer ( $N = 6$ ) in the singlet and triplet states.

| Ring index | singlet ( $S = 0$ ) | triplet ( $S = 1$ ) | Ring index | singlet ( $S = 0$ ) | triplet ( $S = 1$ ) |
|------------|---------------------|---------------------|------------|---------------------|---------------------|
| 1A         | -7.0575             | -7.0537             | 2A         | -3.5268             | -3.5248             |
| 1B         | -0.0129             | -0.0115             | 2B         | -1.8696             | -1.8687             |
| 1C         | -4.5228             | -4.5270             | 2C         | -3.6951             | -3.6975             |
| 1D         | -9.4662             | -9.4645             | 2D         | -9.7405             | -9.7412             |
| 1E         | -1.2281             | -1.2225             | 2E         | -0.8755             | -0.8748             |
| 1F         | -9.1687             | -9.1710             | 2F         | -9.2996             | -9.3001             |
| 3A         | -3.4946             | -3.4918             | 4A         | -3.5138             | -3.5185             |
| 3B         | -1.3499             | -1.3526             | 4B         | -1.8684             | -1.8713             |
| 3C         | -3.2635             | -3.2656             | 4C         | -3.7297             | -3.7309             |
| 3D         | -9.6147             | -9.6153             | 4D         | -9.7357             | -9.7374             |
| 3E         | -0.8103             | -0.8084             | 4E         | -0.8663             | -0.8748             |
| 3F         | -9.2518             | -9.2525             | 4F         | -9.3406             | -9.3471             |
| 5A         | -3.4471             | -3.4448             | 6A         | -3.4681             | -3.4666             |
| 5B         | -1.3572             | -1.3581             | 6B         | -1.7559             | -1.7588             |
| 5C         | -3.3030             | -3.3028             | 6C         | -3.9762             | -3.9755             |
| 5D         | -9.6508             | -9.6518             | 6D         | -10.5014            | -10.5056            |
| 5E         | -0.8762             | -0.8770             | 6E         | -3.3787             | -3.3847             |
| 5F         | -9.3210             | -9.3250             | 6F         | -9.8668             | -9.8594             |

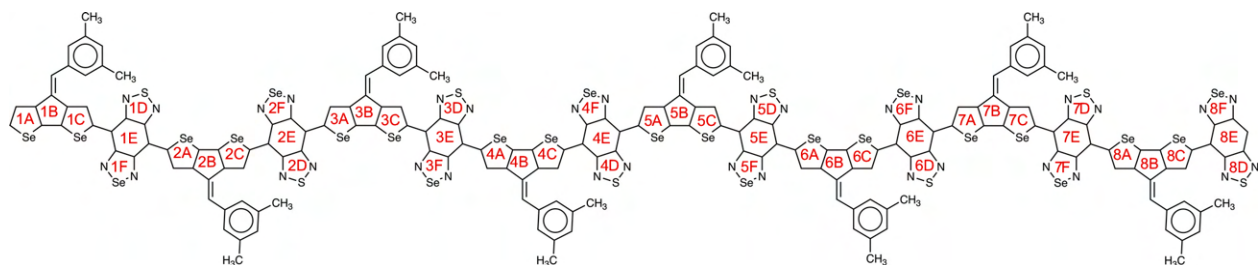

Table S23: Calculated  $\text{NICS}_{\text{iso}}(1)$  (ppm) of CPDS-SeBBT octamer ( $N = 8$ ) in the singlet and triplet states.

| Ring index | singlet ( $S = 0$ ) | triplet ( $S = 1$ ) | Ring index | singlet ( $S = 0$ ) | triplet ( $S = 1$ ) |
|------------|---------------------|---------------------|------------|---------------------|---------------------|
| 1A         | -7.0610             | -7.0628             | 2A         | -3.5495             | -3.5506             |
| 1B         | -0.0091             | -0.0086             | 2B         | -1.8699             | -1.8713             |
| 1C         | -4.5221             | -4.5207             | 2C         | -3.6753             | -3.6744             |
| 1D         | -9.4578             | -9.4615             | 2D         | -9.7501             | -9.7493             |
| 1E         | -1.2225             | -1.2243             | 2E         | -0.8764             | -0.8748             |
| 1F         | -9.1626             | -9.1602             | 2F         | -9.2933             | -9.2858             |
| 3A         | -3.5136             | -3.5115             | 4A         | -3.5468             | -3.5465             |
| 3B         | -1.3510             | -1.3450             | 4B         | -1.8711             | -1.8723             |
| 3C         | -3.2561             | -3.2537             | 4C         | -3.6856             | -3.6887             |
| 3D         | -9.6095             | -9.6098             | 4D         | -9.7422             | -9.7418             |
| 3E         | -0.7999             | -0.7990             | 4E         | -0.8697             | -0.8690             |
| 3F         | -9.2391             | -9.2306             | 4F         | -9.3144             | -9.3205             |
| 5A         | -3.5002             | -3.5006             | 6A         | -3.5164             | -3.5156             |
| 5B         | -1.3535             | -1.3551             | 6B         | -1.8694             | -1.8699             |
| 5C         | -3.2536             | -3.2540             | 6C         | -3.7447             | -3.7463             |
| 5D         | -9.6126             | -9.6133             | 6D         | -9.7403             | -9.7443             |
| 5E         | -0.8018             | -0.8052             | 6E         | -0.8718             | -0.8717             |
| 5F         | -9.2661             | -9.2694             | 6F         | -9.3557             | -9.3550             |
| 7A         | -3.4413             | -3.4401             | 8A         | -3.4542             | -3.4570             |
| 7B         | -1.3658             | -1.3624             | 8B         | -1.7550             | -1.7575             |
| 7C         | -3.3006             | -3.3010             | 8C         | -3.9918             | -3.9917             |
| 7D         | -9.6522             | -9.6526             | 8D         | -10.5035            | -10.5041            |
| 7E         | -0.8737             | -0.8789             | 8E         | -3.4190             | -3.4224             |
| 7F         | -9.3364             | -9.3331             | 8F         | -9.8831             | -9.8841             |

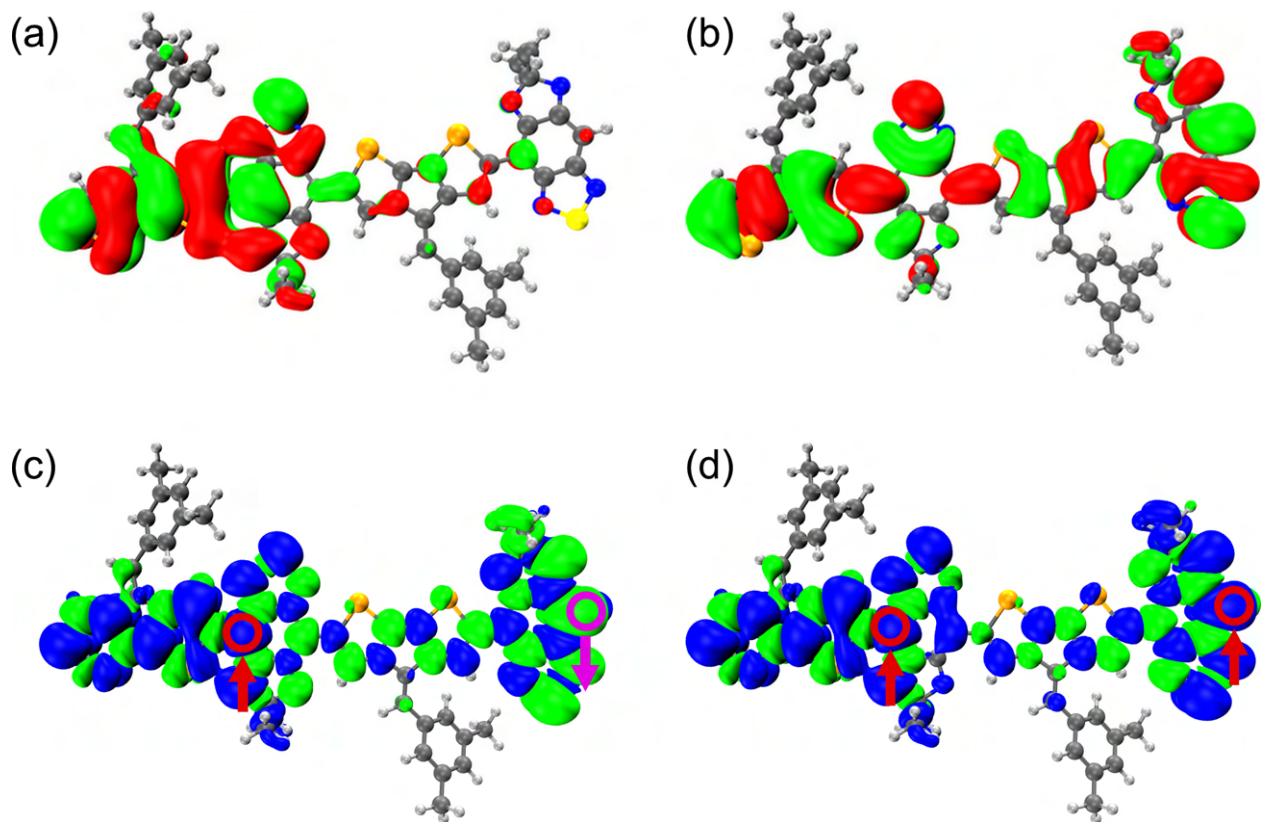

Figure S24: Optimized ground-state geometric structures for the CPDS-CBBT dimer ( $N = 2$ ) and pictorial representations of the SOMOs with spin density distribution. (a)  $\alpha$ -SOMO and (b)  $\beta$ -SOMO-1 of the open-shell singlet ( $S = 0$ ), (c) spin density distribution of the singlet and (d) triplet states ( $S = 1$ ). The green and red surfaces represent positive and negative signs of the MO at isovalue = 0.01 au, respectively. The blue and green surfaces represent positive and negative contributions of the spin density at an isovalue = 0.0002 au. The most probable locations for the unpaired electrons are indicated with up (alpha spin) and down (beta spin) arrows and open circles, respectively. Color codes for the atoms are: gray for C, blue for N, and yellow for S.

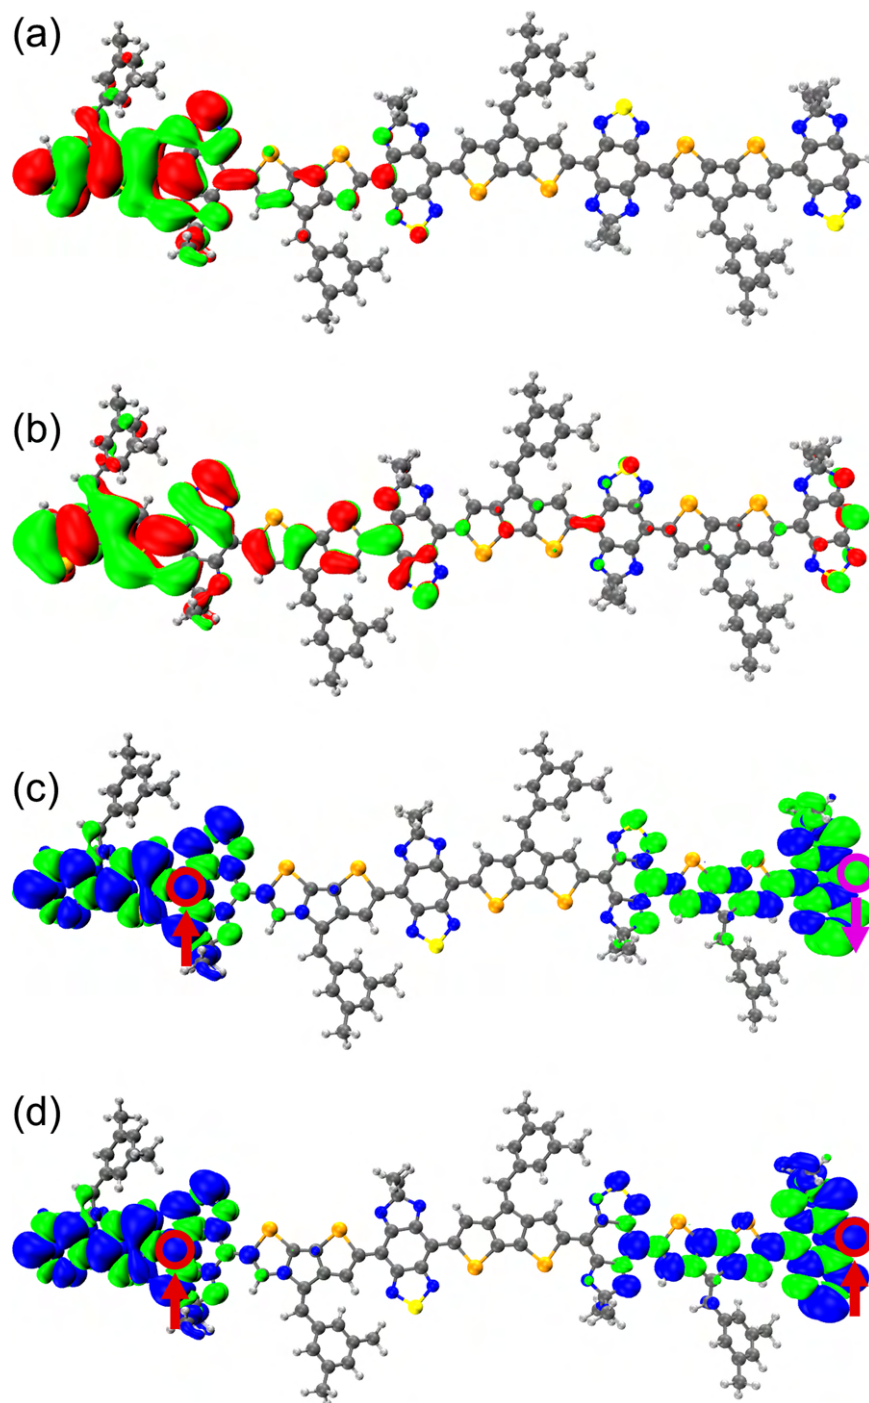

Figure S25: Optimized ground-state geometric structures for the CPDS-CBBT tetramer ( $N = 4$ ) and pictorial representations of the SOMOs with spin density distribution. (a)  $\alpha$ -SOMO and (b)  $\beta$ -SOMO-3 of the open-shell singlet ( $S = 0$ ), (c) spin density distribution of the singlet and (d) triplet states ( $S = 1$ ). The green and red surfaces represent positive and negative signs of the MO at isovalue = 0.01 au, respectively. The blue and green surfaces represent positive and negative contributions of the spin density at an isovalue = 0.0002 au. The most probable locations for the unpaired electrons are indicated with up (alpha spin) and down (beta spin) arrows and open circles, respectively. Color codes for the atoms are: gray for C, blue for N, and yellow for S.



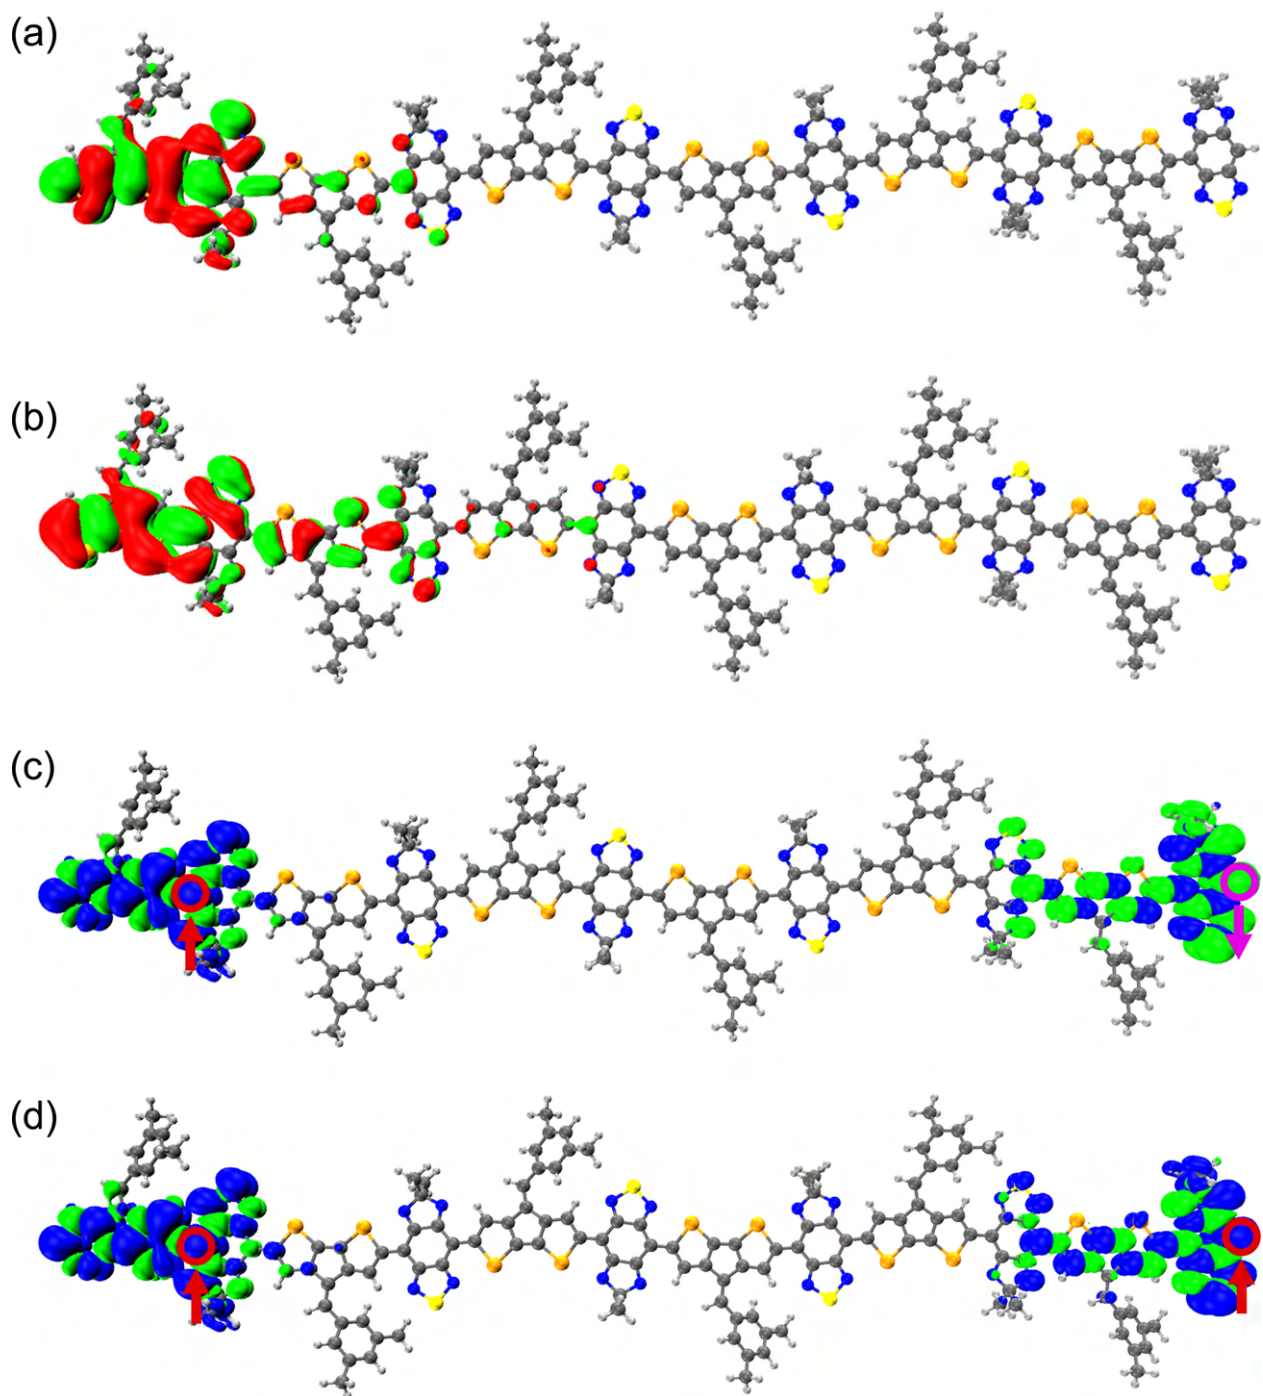

Figure S26: Optimized ground-state geometric structures for the CPDS-CBBT hexamer ( $N = 6$ ) and pictorial representations of the SOMOs with spin density distribution. (a)  $\alpha$ -SOMO and (b)  $\beta$ -SOMO-4 of the open-shell singlet ( $S = 0$ ), (c) spin density distribution of the singlet and (d) triplet states ( $S = 1$ ). The green and red surfaces represent positive and negative signs of the MO at isovalue = 0.01 au, respectively. The blue and green surfaces represent positive and negative contributions of the spin density at an isovalue = 0.0002 au. The most probable locations for the unpaired electrons are indicated with up (alpha spin) and down (beta spin) arrows and open circles, respectively. Color codes for the atoms are: gray for C, blue for N, and yellow for S.

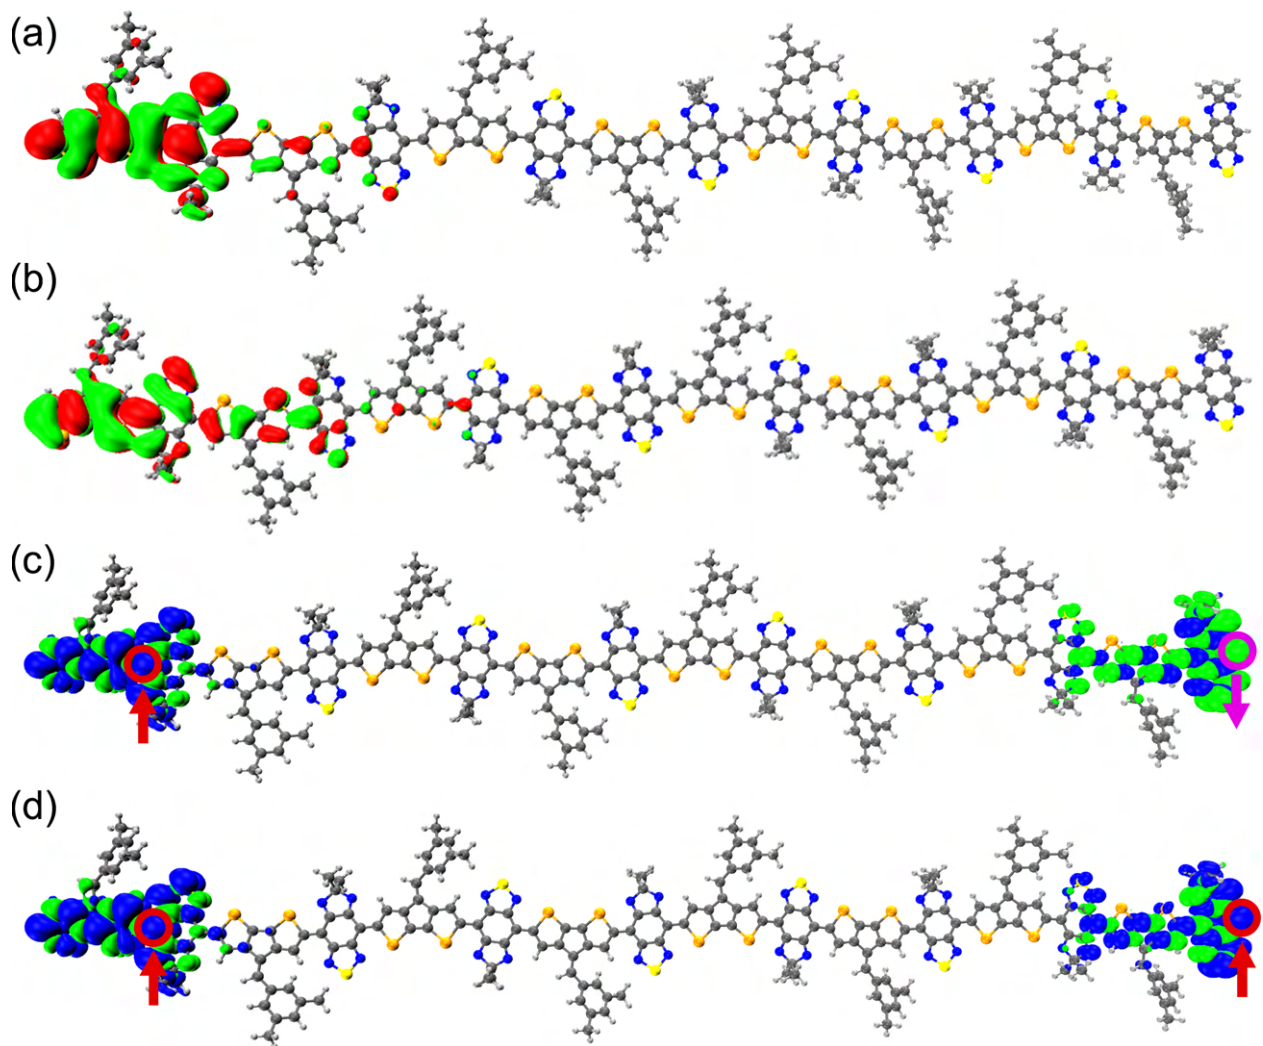

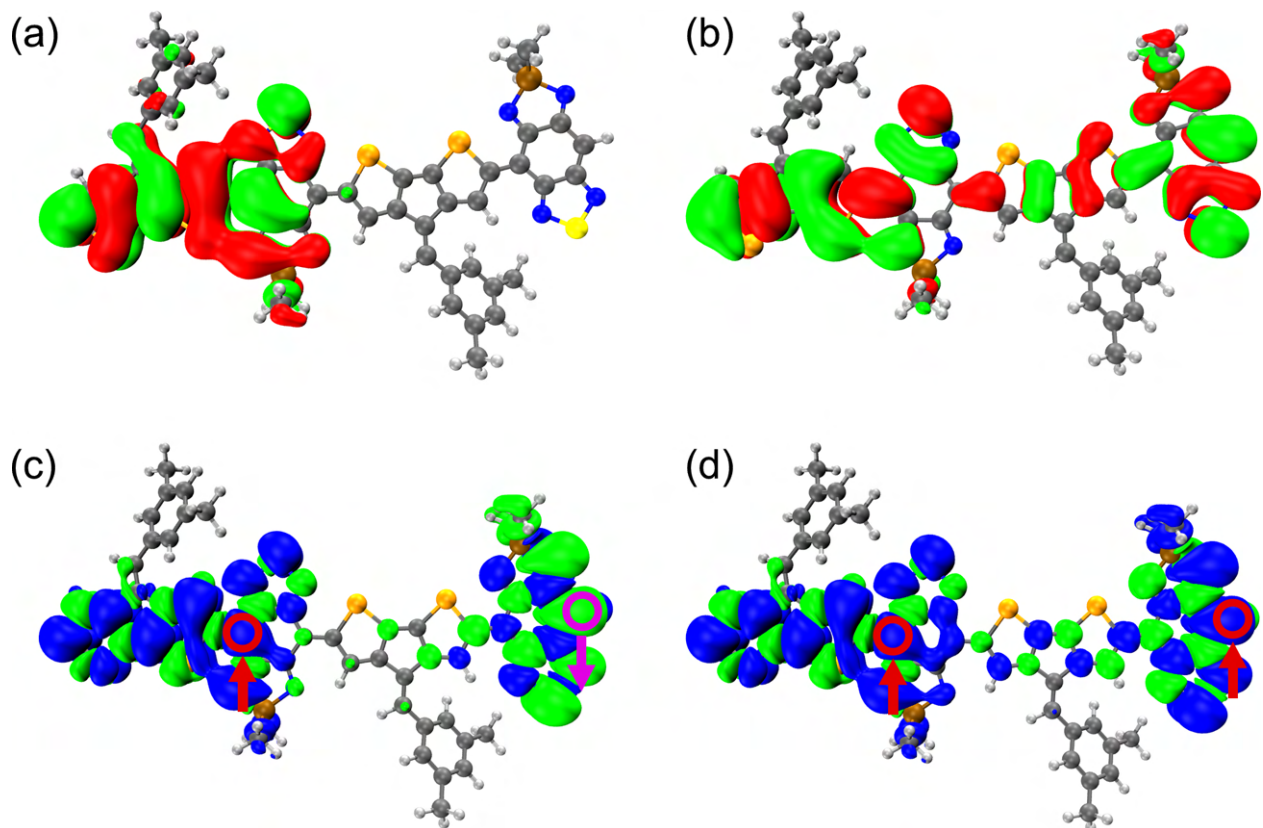

Figure S28: Optimized ground-state geometric structures for the CPDS-SiBBT dimer ( $N = 2$ ) and pictorial representations of the SOMOs with spin density distribution. (a)  $\alpha$ -SOMO and (b)  $\beta$ -SOMO-1 of the open-shell singlet ( $S = 0$ ), (c) spin density distribution of the singlet and (d) triplet states ( $S = 1$ ). The green and red surfaces represent positive and negative signs of the MO at isovalue = 0.01 au, respectively. The blue and green surfaces represent positive and negative contributions of the spin density at an isovalue = 0.0002 au. The most probable locations for the unpaired electrons are indicated with up (alpha spin) and down (beta spin) arrows and open circles, respectively. Color codes for the atoms are: gray for C, blue for N, and yellow for S.

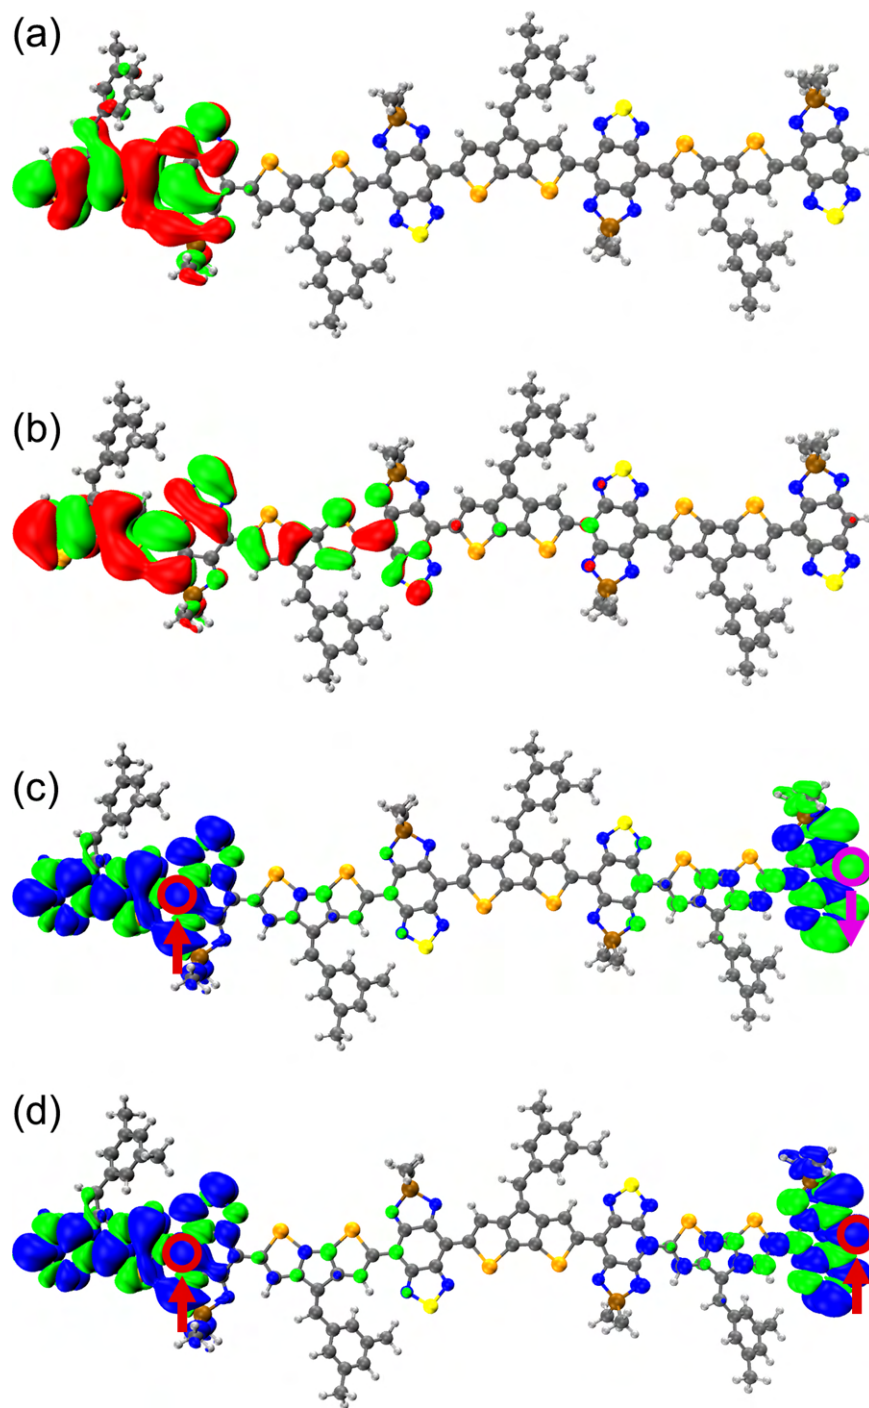

Figure S29: Optimized ground-state geometric structures for the CPDS-SiBBT tetramer ( $N = 4$ ) and pictorial representations of the SOMOs with spin density distribution. (a)  $\alpha$ -SOMO and (b)  $\beta$ -SOMO-3 of the open-shell singlet ( $S = 0$ ), (c) spin density distribution of the singlet and (d) triplet states ( $S = 1$ ). The green and red surfaces represent positive and negative signs of the MO at isovalue = 0.01 au, respectively. The blue and green surfaces represent positive and negative contributions of the spin density at an isovalue = 0.0002 au. The most probable locations for the unpaired electrons are indicated with up (alpha spin) and down (beta spin) arrows and open circles, respectively. Color codes for the atoms are: gray for C, blue for N, and yellow for S.

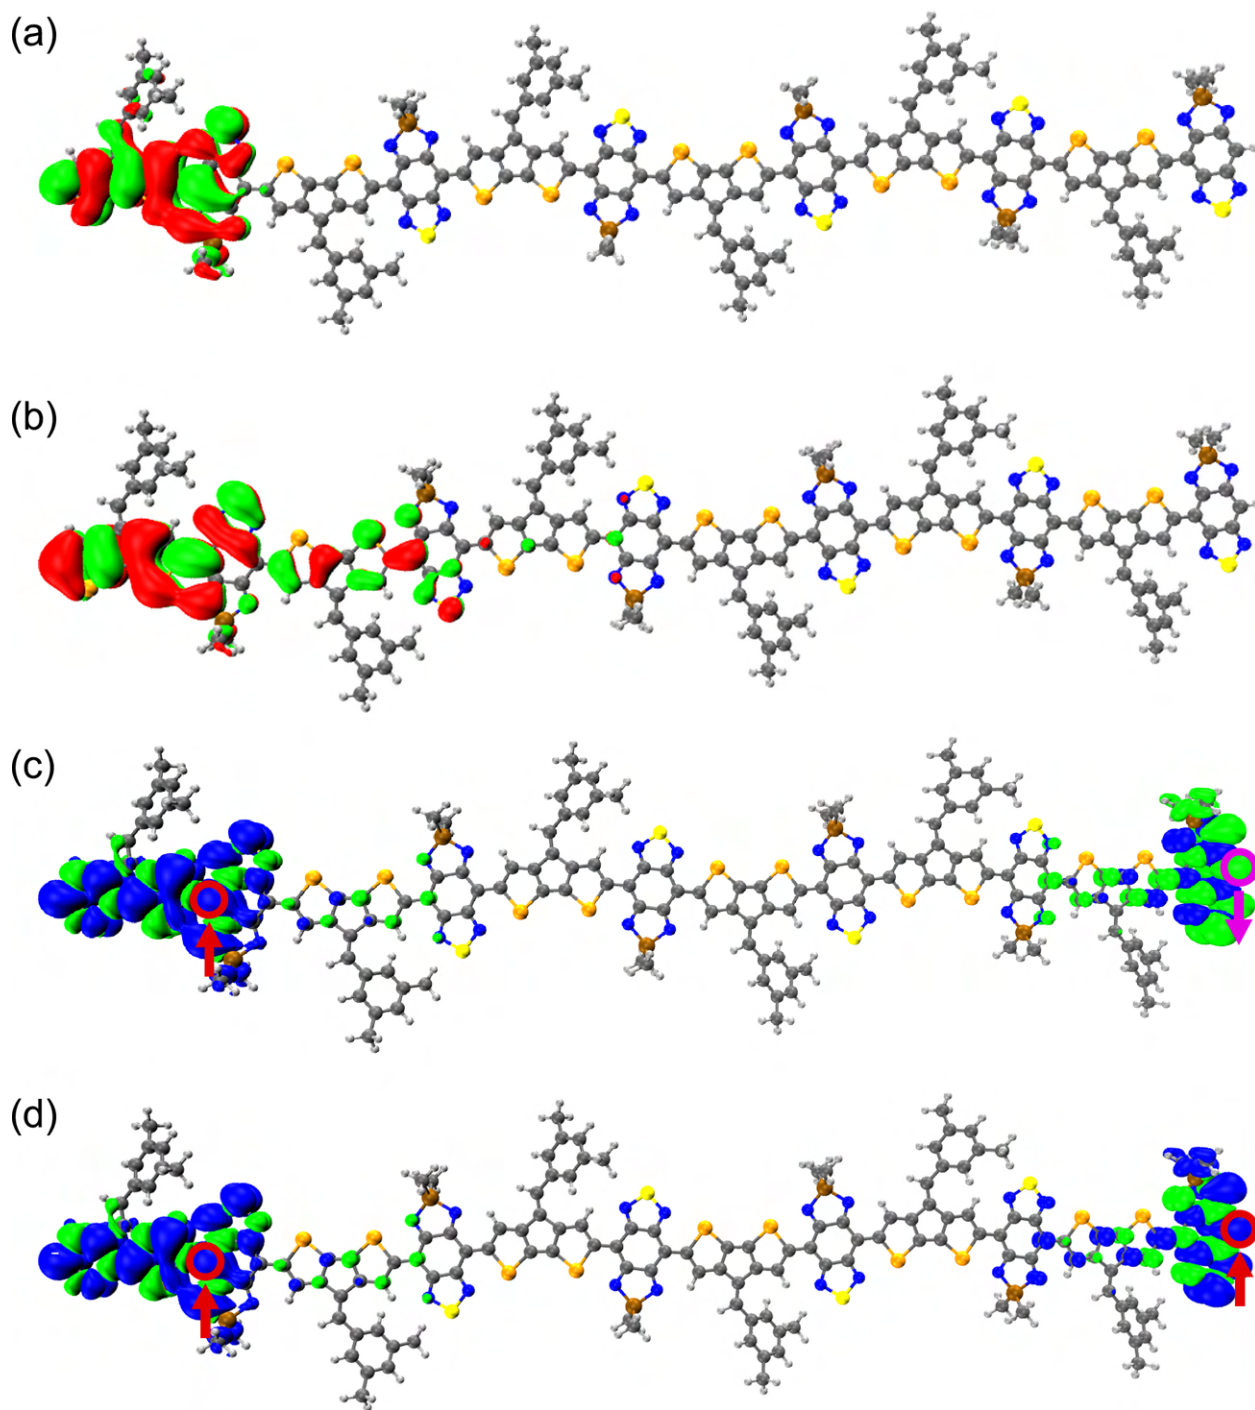

Figure S30: Optimized ground-state geometric structures for the CPDS-SiBBT hexamer ( $N = 6$ ) and pictorial representations of the SOMOs with spin density distribution. (a)  $\alpha$ -SOMO and (b)  $\beta$ -SOMO-5 of the open-shell singlet ( $S = 0$ ), (c) spin density distribution of the singlet and (d) triplet states ( $S = 1$ ). The green and red surfaces represent positive and negative signs of the MO at isovalue = 0.01 au, respectively. The blue and green surfaces represent positive and negative contributions of the spin density at an isovalue = 0.0002 au. The most probable locations for the unpaired electrons are indicated with up (alpha spin) and down (beta spin) arrows and open circles, respectively. Color codes for the atoms are: gray for C, blue for N, and yellow for S.

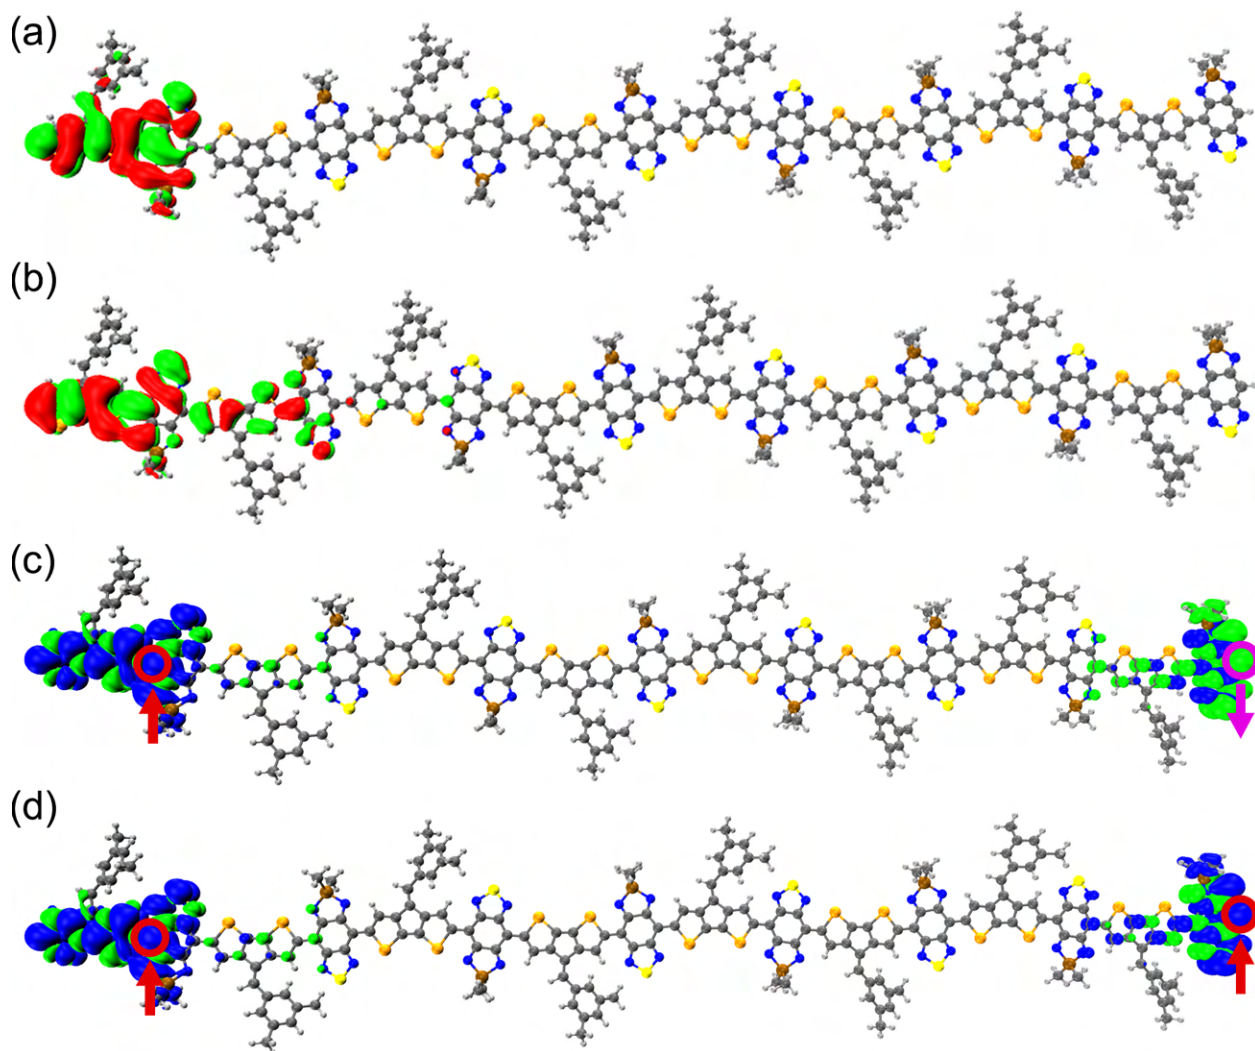

Figure S31: Optimized ground-state geometric structures for the CPDS-SiBBT octamer ( $N = 8$ ) and pictorial representations of the SOMOs with spin density distribution. (a)  $\alpha$ -SOMO and (b)  $\beta$ -SOMO-6 of the open-shell singlet ( $S = 0$ ), (c) spin density distribution of the singlet and (d) triplet states ( $S = 1$ ). The green and red surfaces represent positive and negative signs of the MO at isovalue = 0.01 au, respectively. The blue and green surfaces represent positive and negative contributions of the spin density at an isovalue = 0.0002 au. The most probable locations for the unpaired electrons are indicated with up (alpha spin) and down (beta spin) arrows and open circles, respectively. Color codes for the atoms are: gray for C, blue for N, and yellow for S.

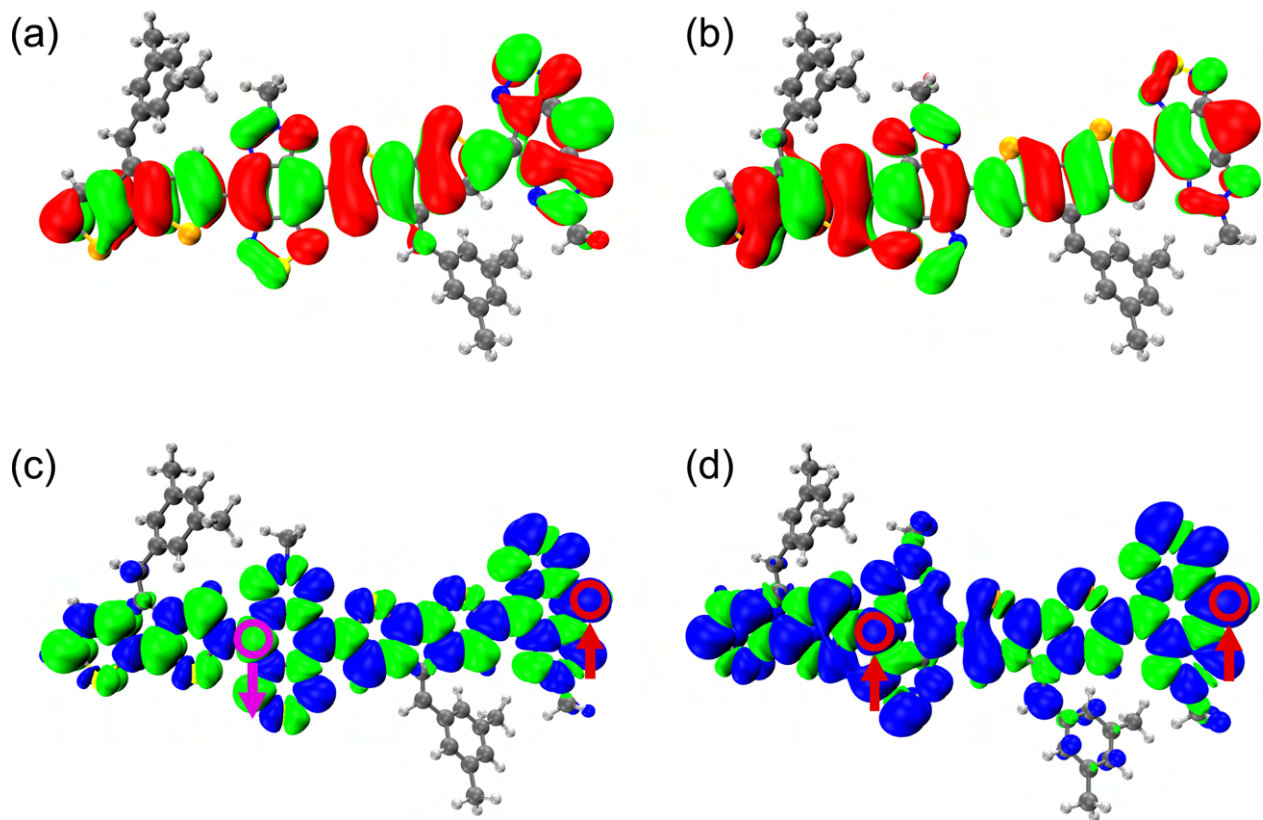

Figure S32: Optimized ground-state geometric structures for the CPDS-NBBT dimer ( $N = 2$ ) and pictorial representations of the SOMOs with spin density distribution. (a)  $\alpha$ -SOMO and (b)  $\beta$ -SOMO of the open-shell singlet ( $S = 0$ ), (c) spin density distribution of the singlet and (d) triplet states ( $S = 1$ ). The green and red surfaces represent positive and negative signs of the MO at isovalue = 0.01 au, respectively. The blue and green surfaces represent positive and negative contributions of the spin density at an isovalue = 0.0002 au. The most probable locations for the unpaired electrons are indicated with up (alpha spin) and down (beta spin) arrows and open circles, respectively. Color codes for the atoms are: gray for C, blue for N, yellow for S, and orange for Se.

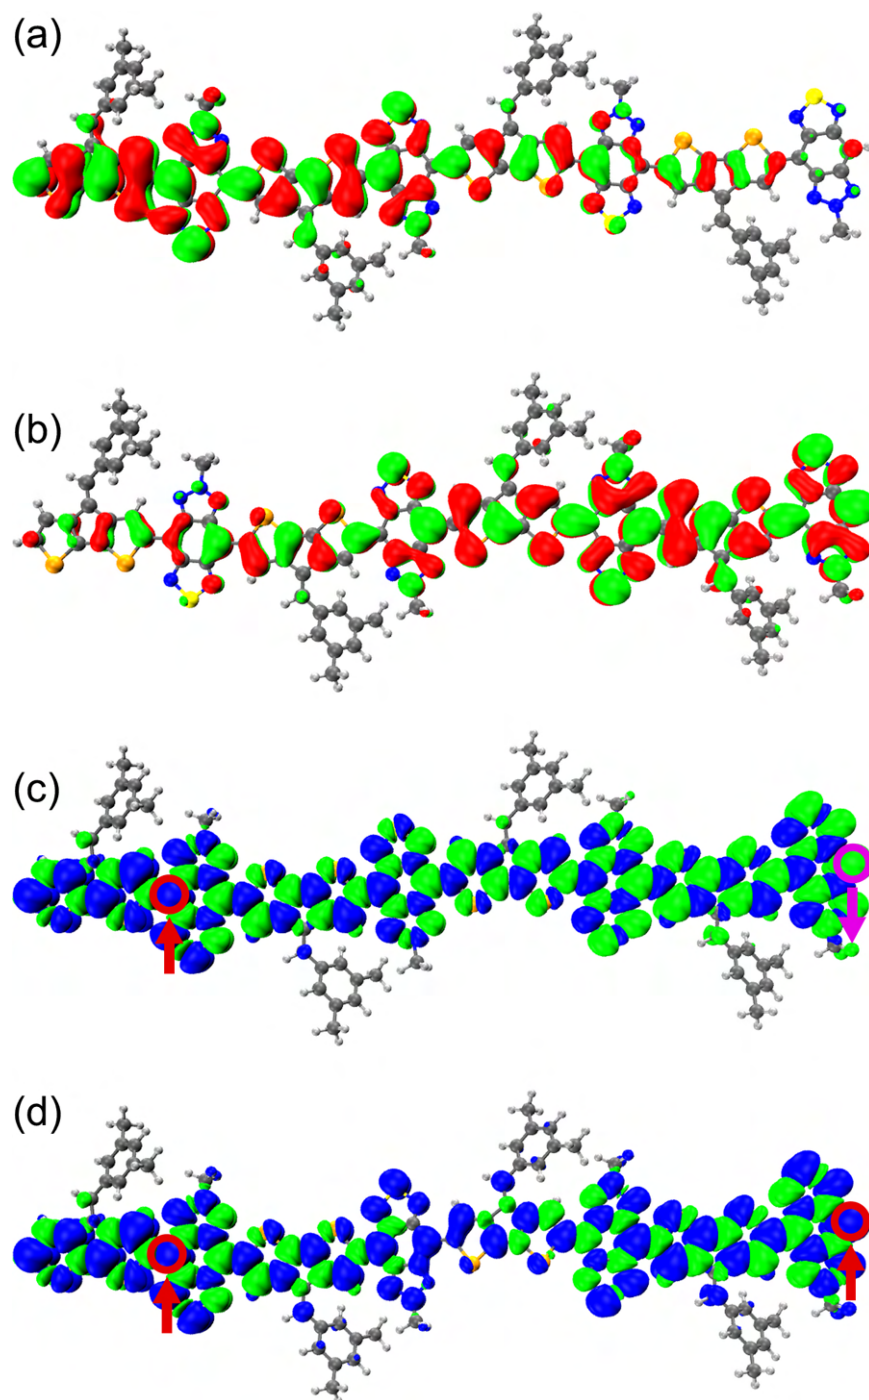

Figure S33: Optimized ground-state geometric structures for the CPDS-NBBT tetramer ( $N = 4$ ) and pictorial representations of the SOMOs with spin density distribution. (a)  $\alpha$ -SOMO and (b)  $\beta$ -SOMO of the open-shell singlet ( $S = 0$ ), (c) spin density distribution of the singlet and (d) triplet states ( $S = 1$ ). The green and red surfaces represent positive and negative signs of the MO at isovalue = 0.01 au, respectively. The blue and green surfaces represent positive and negative contributions of the spin density at an isovalue = 0.0002 au. The most probable locations for the unpaired electrons are indicated with up (alpha spin) and down (beta spin) arrows and open circles, respectively. Color codes for the atoms are: gray for C, blue for N, yellow for S, and orange for Se.



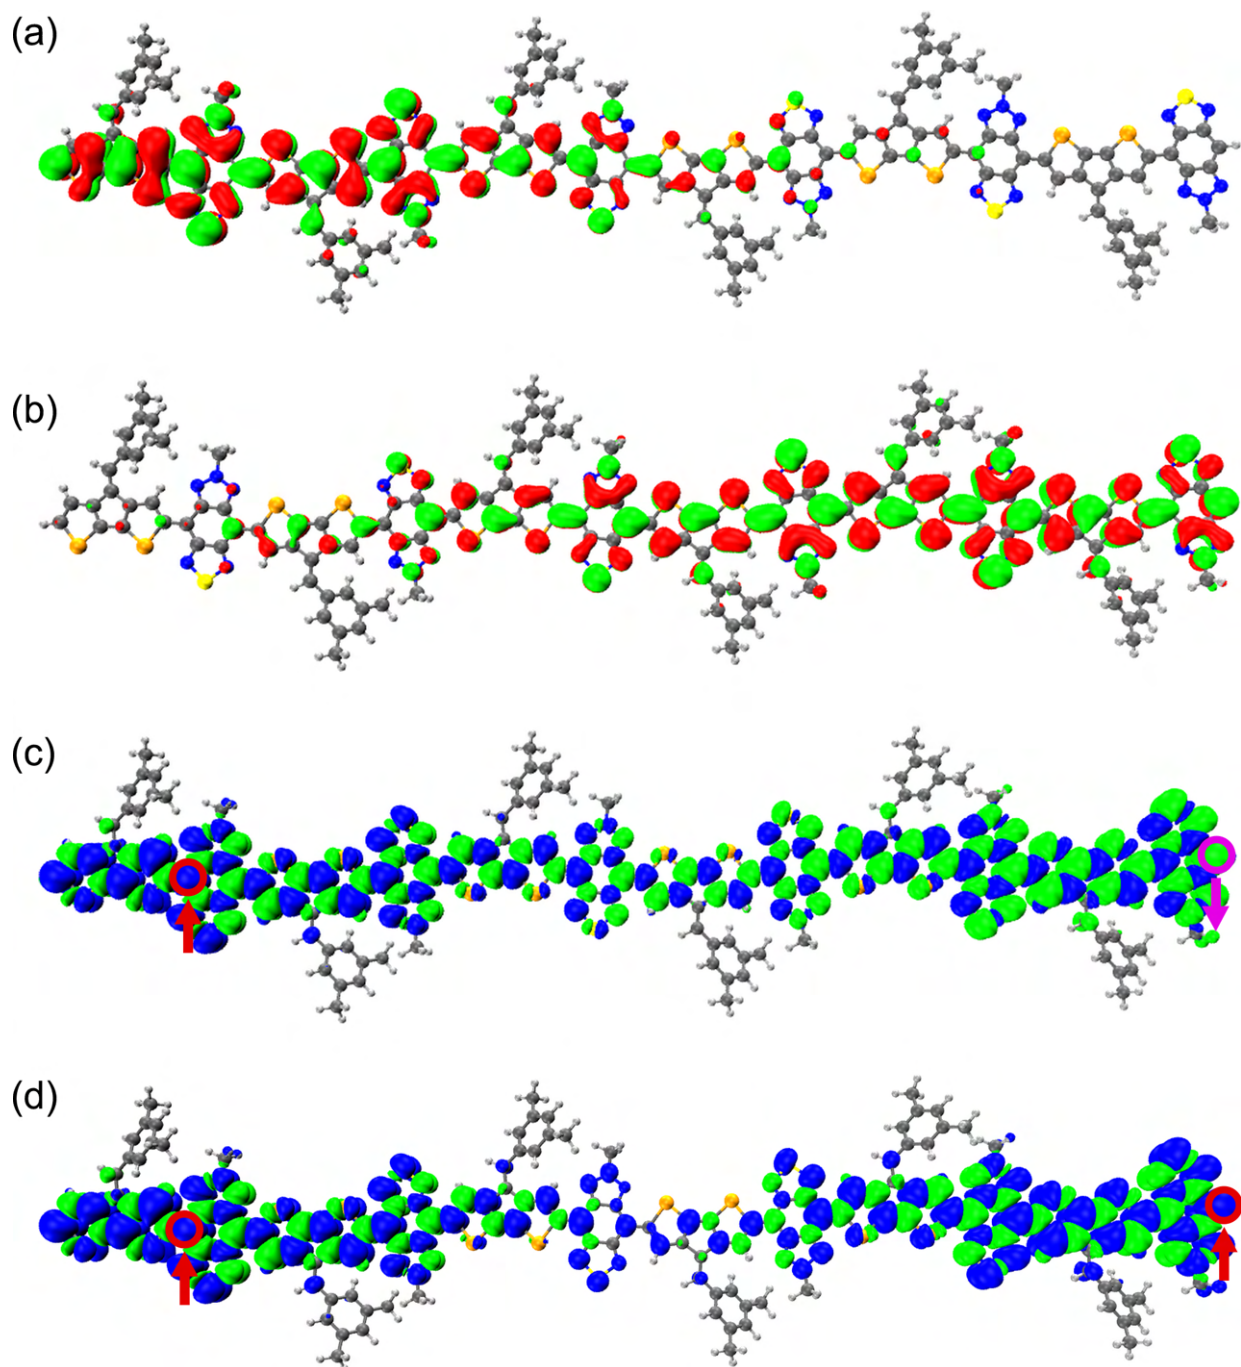

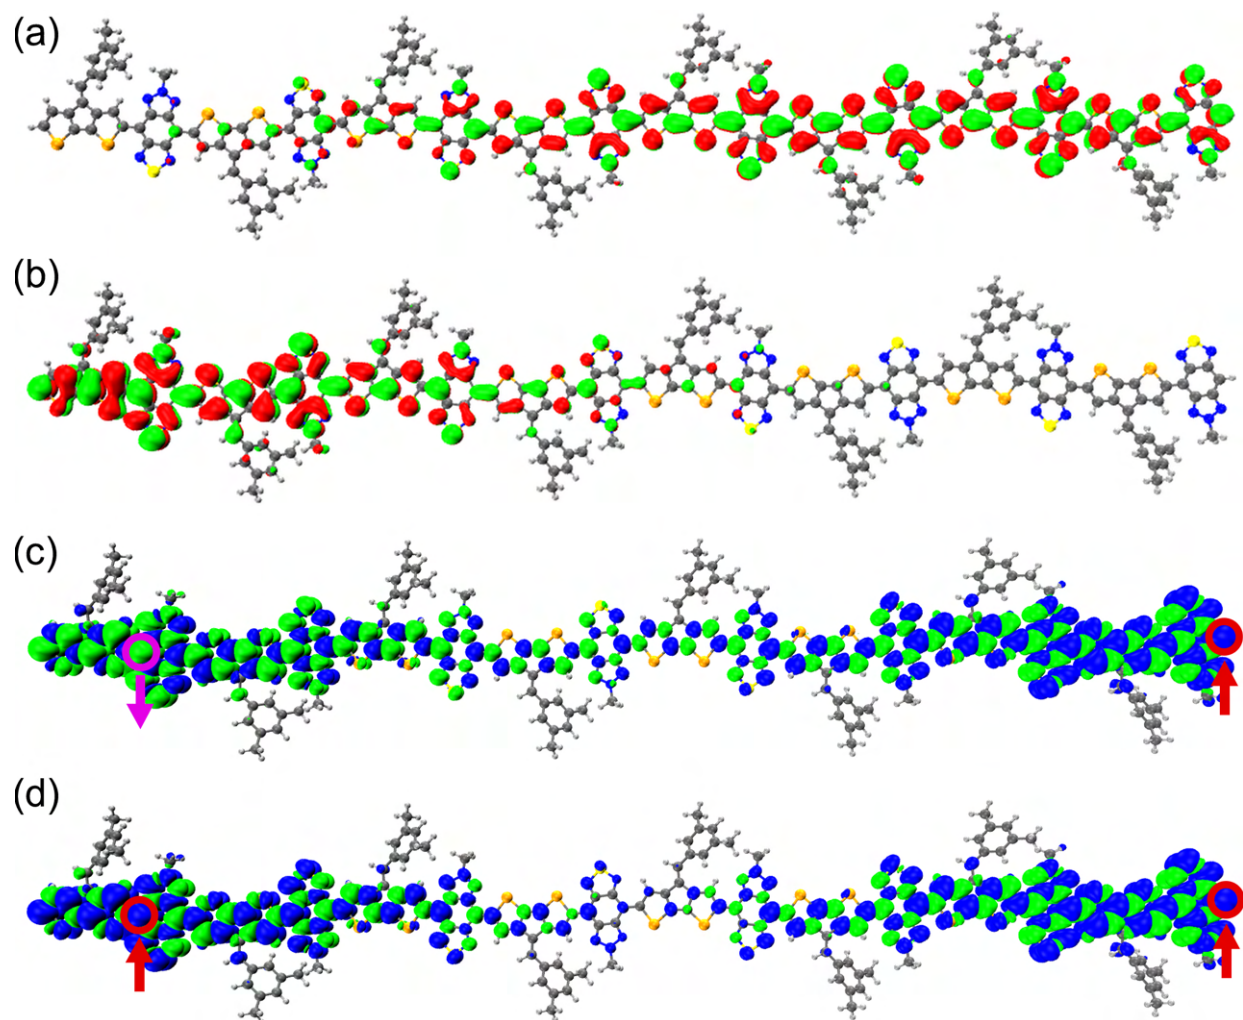

Figure S35: Optimized ground-state geometric structures for the CPDS-NBBT octamer ( $N = 8$ ) and pictorial representations of the SOMOs with spin density distribution. (a)  $\alpha$ -SOMO-1 and (b)  $\beta$ -SOMO of the open-shell singlet; (c) spin density distribution of the singlet ( $S = 0$ ) and (d) triplet ( $S = 1$ ) states. The green and red surfaces represent positive and negative signs of the MO at isovalue = 0.01 au, respectively. The blue and green surfaces represent positive and negative contributions of the spin density at an isovalue = 0.0002 au. The most probable locations for the unpaired electrons are highlighted with open circles (red: up-spin and purple: down-spin).

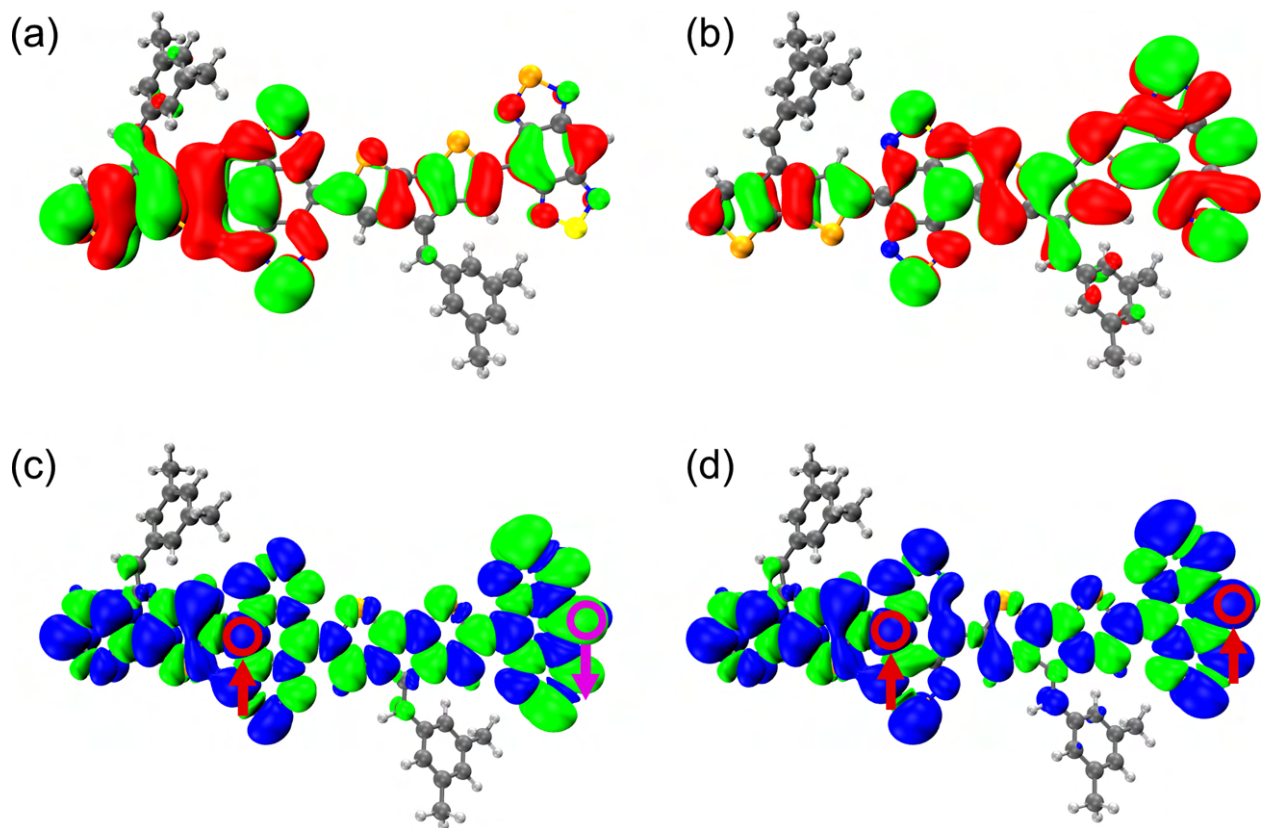

Figure S36: Optimized ground-state geometric structures for the CPDS-SeBBT dimer ( $N = 2$ ) and pictorial representations of the SOMOs with spin density distribution. (a)  $\alpha$ -SOMO and (b)  $\beta$ -SOMO of the open-shell singlet ( $S = 0$ ), (c) spin density distribution of the singlet and (d) triplet states ( $S = 1$ ). The green and red surfaces represent positive and negative signs of the MO at isovalue = 0.01 au, respectively. The blue and green surfaces represent positive and negative contributions of the spin density at an isovalue = 0.0002 au. The most probable locations for the unpaired electrons are indicated with up (alpha spin) and down (beta spin) arrows and open circles, respectively. Color codes for the atoms are: gray for C, blue for N, and yellow for S.

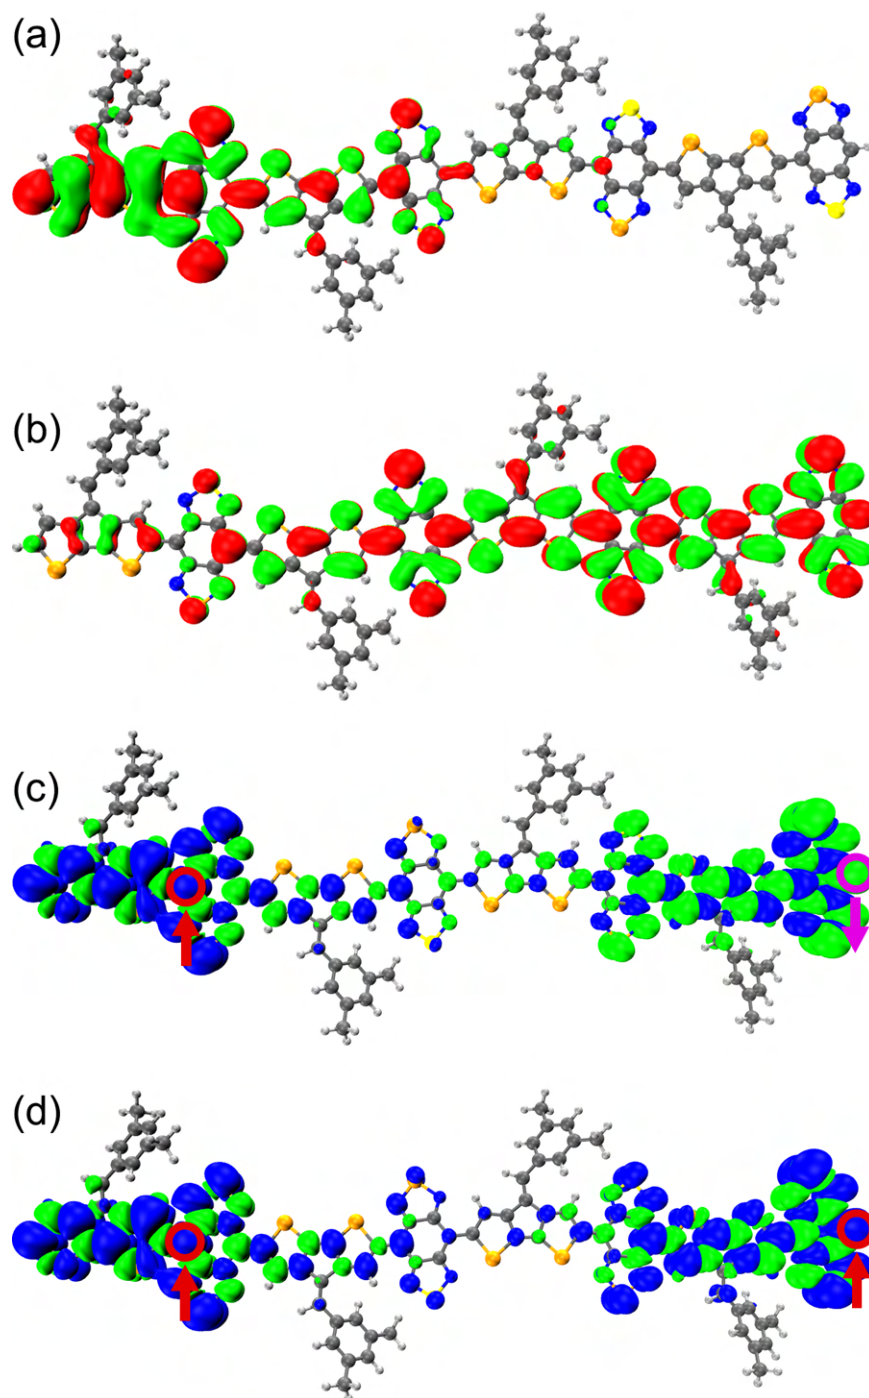

Figure S37: Optimized ground-state geometric structures for the CPDS-SeBBT tetramer ( $N = 4$ ) and pictorial representations of the SOMOs with spin density distribution. (a)  $\alpha$ -SOMO and (b)  $\beta$ -SOMO of the open-shell singlet ( $S = 0$ ), (c) spin density distribution of the singlet and (d) triplet states ( $S = 1$ ). The green and red surfaces represent positive and negative signs of the MO at isovalue = 0.01 au, respectively. The blue and green surfaces represent positive and negative contributions of the spin density at an isovalue = 0.0002 au. The most probable locations for the unpaired electrons are indicated with up (alpha spin) and down (beta spin) arrows and open circles, respectively. Color codes for the atoms are: gray for C, blue for N, and yellow for S.

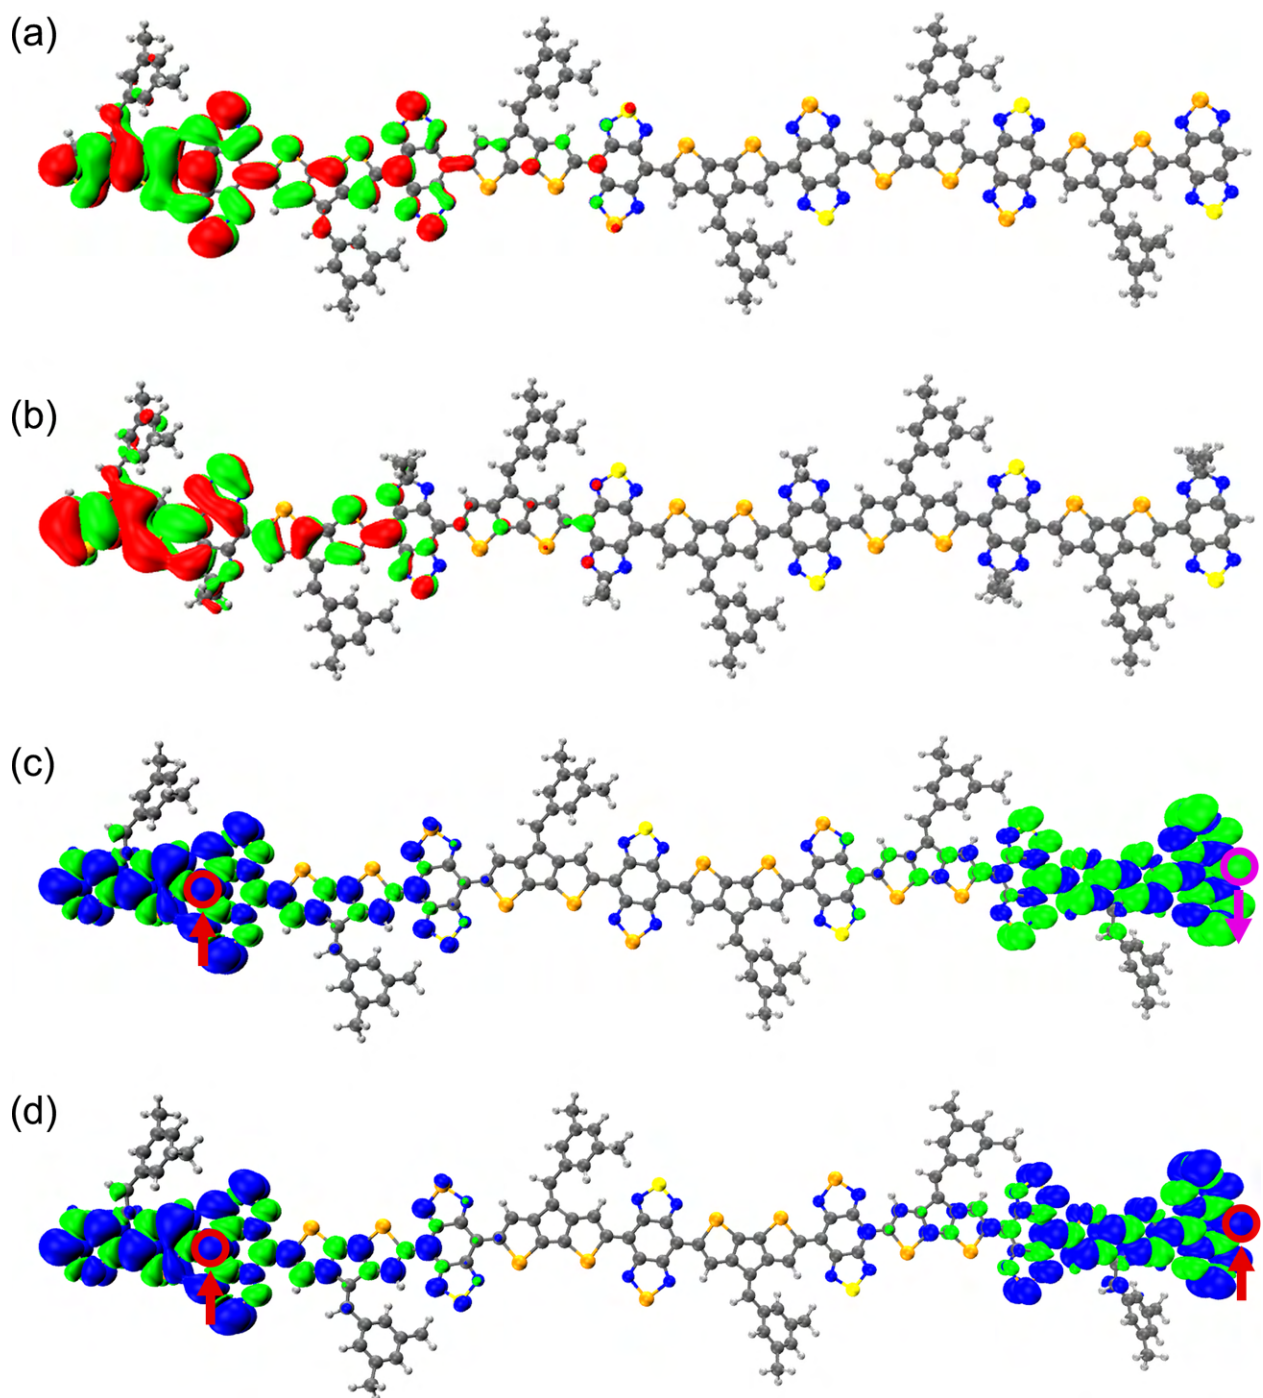

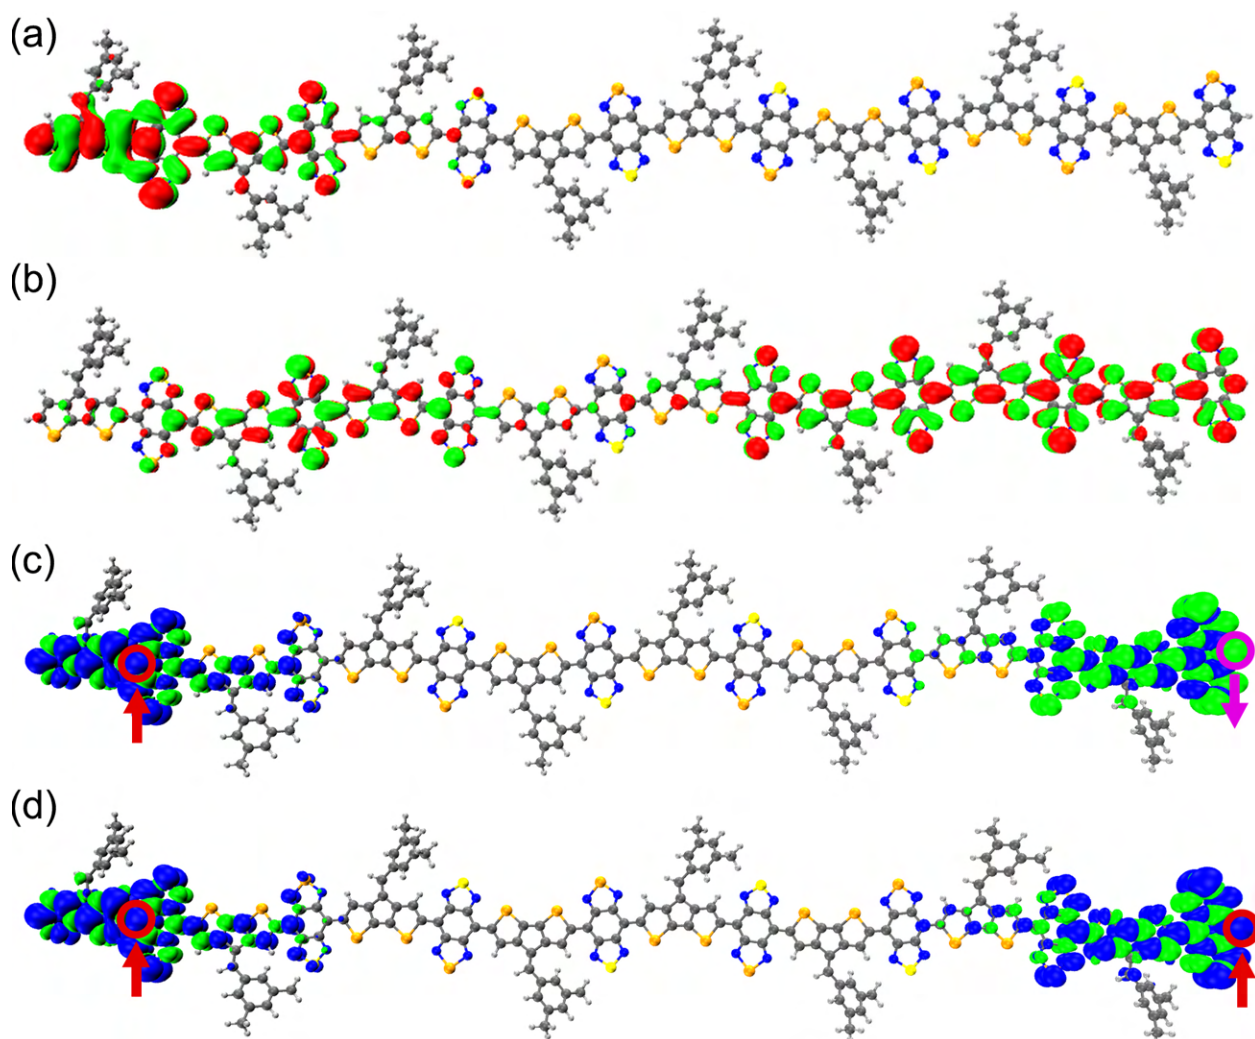

Figure S39: Optimized ground-state geometric structures for the CPDS-SeBBT octamer ( $N = 8$ ) and pictorial representations of the SOMOs with spin density distribution. (a)  $\alpha$ -SOMO and (b)  $\beta$ -SOMO-1 of the open-shell singlet ( $S = 0$ ), (c) spin density distribution of the singlet and (d) triplet states ( $S = 1$ ). The green and red surfaces represent positive and negative signs of the MO at isovalue = 0.01 au, respectively. The blue and green surfaces represent positive and negative contributions of the spin density at an isovalue = 0.0002 au. The most probable locations for the unpaired electrons are indicated with up (alpha spin) and down (beta spin) arrows and open circles, respectively. Color codes for the atoms are: gray for C, blue for N, and yellow for S.

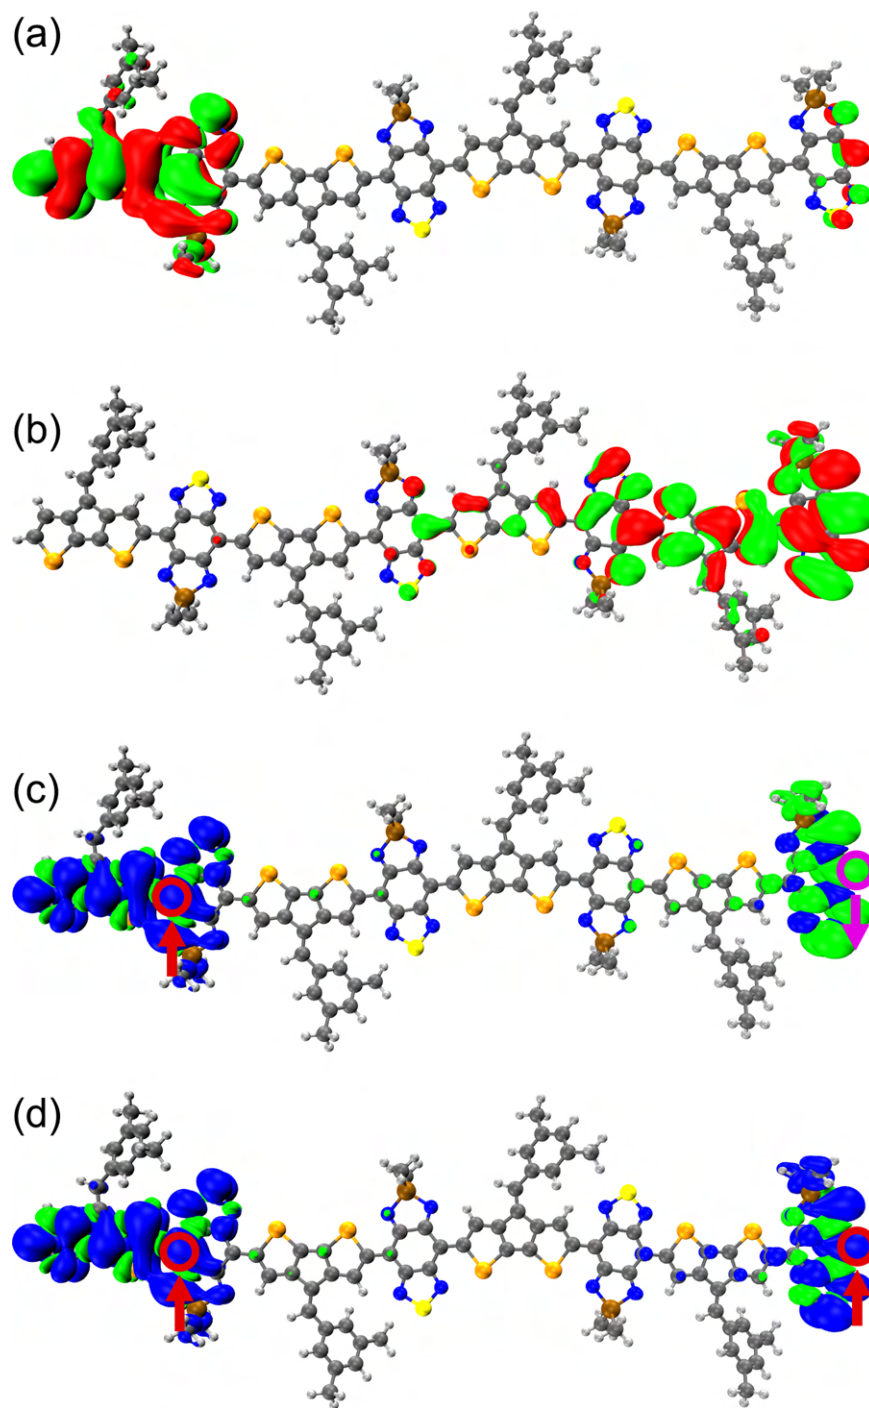

Figure S40: Optimized ground-state geometric structures for the CPDS-SiBBT tetramer ( $N = 4$ ) and pictorial representations of the SOMOs with spin density distribution at UBLYP/6-31G(d,p) level of theory and basis set. (a)  $\alpha$ -SOMO and (b)  $\beta$ -SOMO-3 of the open-shell singlet ( $S = 0$ ), (c) spin density distribution of the singlet and (d) triplet states ( $S = 1$ ). The green and red surfaces represent positive and negative signs of the MO at isovalue = 0.01 au, respectively. The blue and green surfaces represent positive and negative contributions of the spin density at an isovalue = 0.0002 au. The most probable locations for the unpaired electrons are indicated with up (alpha spin) and down (beta spin) arrows and open circles, respectively. Color codes for the atoms are: gray for C, blue for N, and yellow for S.

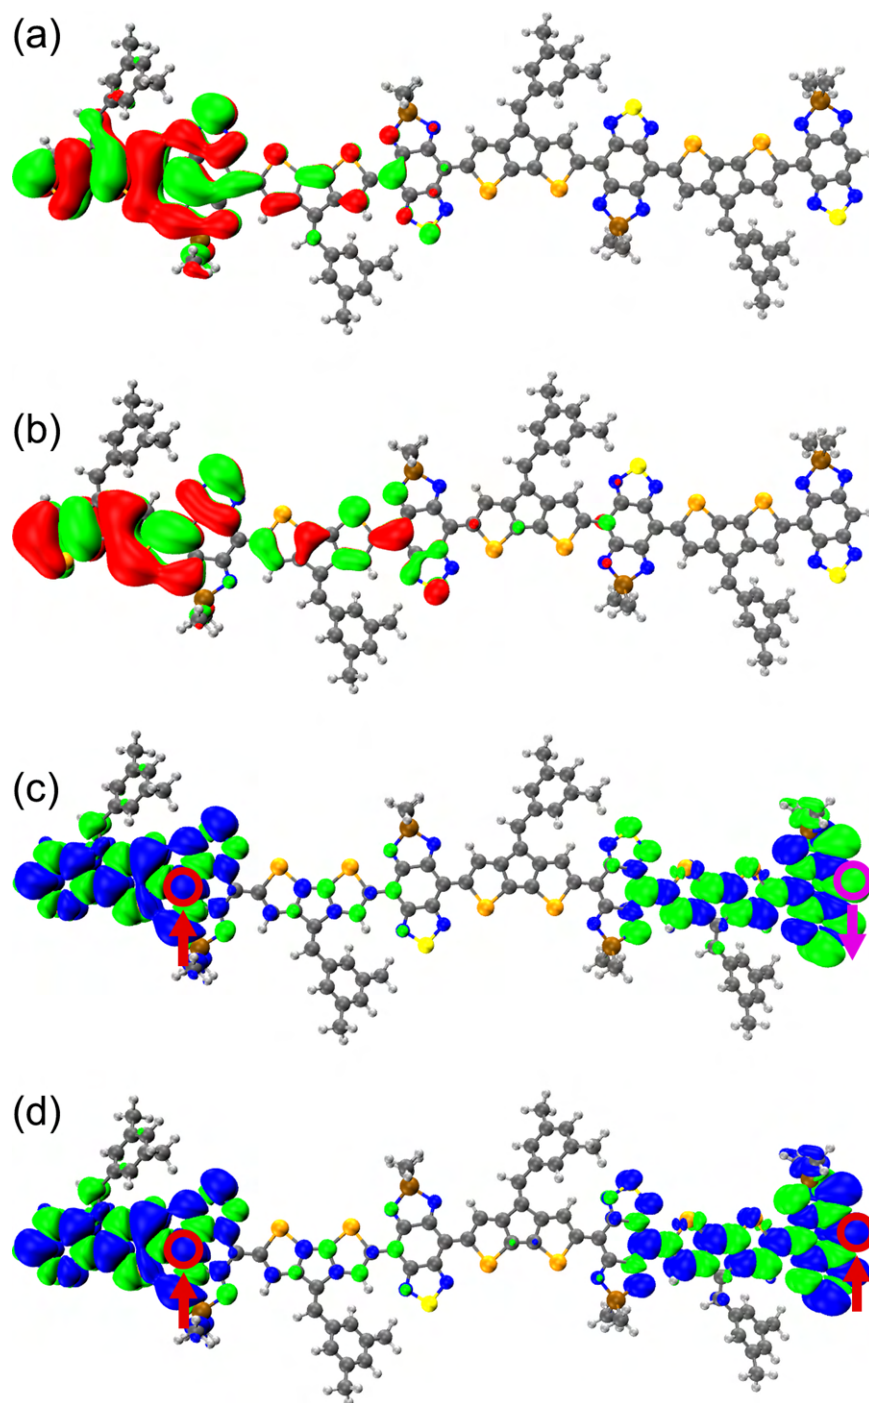

Figure S41: Optimized ground-state geometric structures for the CPDS-SiBBT tetramer ( $N = 4$ ) and pictorial representations of the SOMOs with spin density distribution at UCAM-B3LYP/6-31G(d,p) level of theory and basis set. (a)  $\alpha$ -SOMO and (b)  $\beta$ -SOMO-3 of the open-shell singlet ( $S = 0$ ), (c) spin density distribution of the singlet and (d) triplet states ( $S = 1$ ). The green and red surfaces represent positive and negative signs of the MO at isovalue = 0.01 au, respectively. The blue and green surfaces represent positive and negative contributions of the spin density at an isovalue = 0.0002 au. The most probable locations for the unpaired electrons are indicated with up (alpha spin) and down (beta spin) arrows and open circles, respectively. Color codes for the atoms are: gray for C, blue for N, and yellow for S.



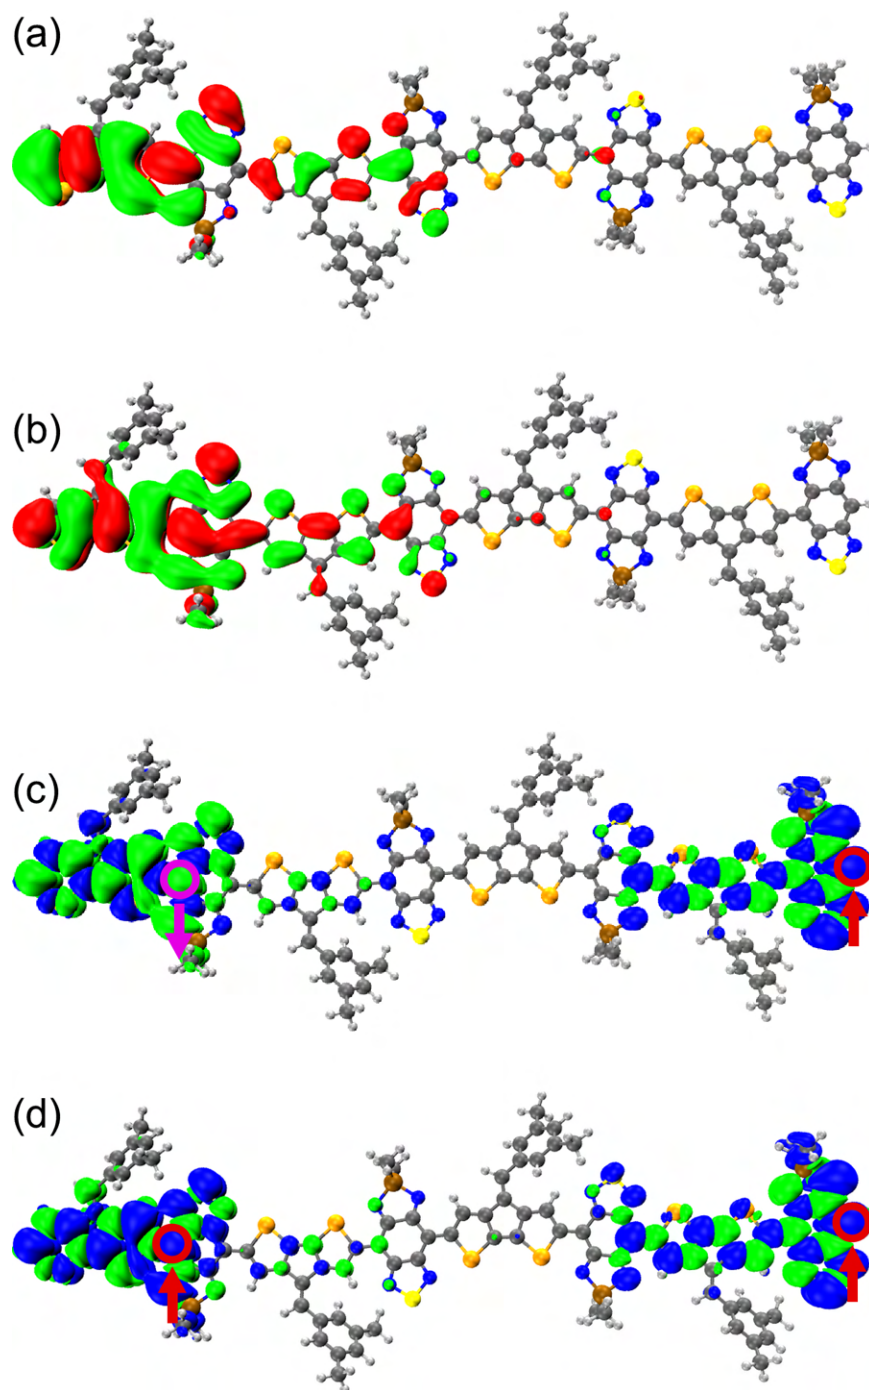

Figure S42: Optimized ground-state geometric structures for the CPDS-SiBBT tetramer ( $N = 4$ ) and pictorial representations of the SOMOs with spin density distribution at  $\omega$ B97X-D/6-31G(d,p) level of theory and basis set. (a)  $\alpha$ -SOMO-3 and (b)  $\beta$ -SOMO of the open-shell singlet ( $S = 0$ ), (c) spin density distribution of the singlet and (d) triplet states ( $S = 1$ ). The green and red surfaces represent positive and negative signs of the MO at isovalue = 0.01 au, respectively. The blue and green surfaces represent positive and negative contributions of the spin density at an isovalue = 0.0002 au. The most probable locations for the unpaired electrons are indicated with up (alpha spin) and down (beta spin) arrows and open circles, respectively. Color codes for the atoms are: gray for C, blue for N, and yellow for Si.

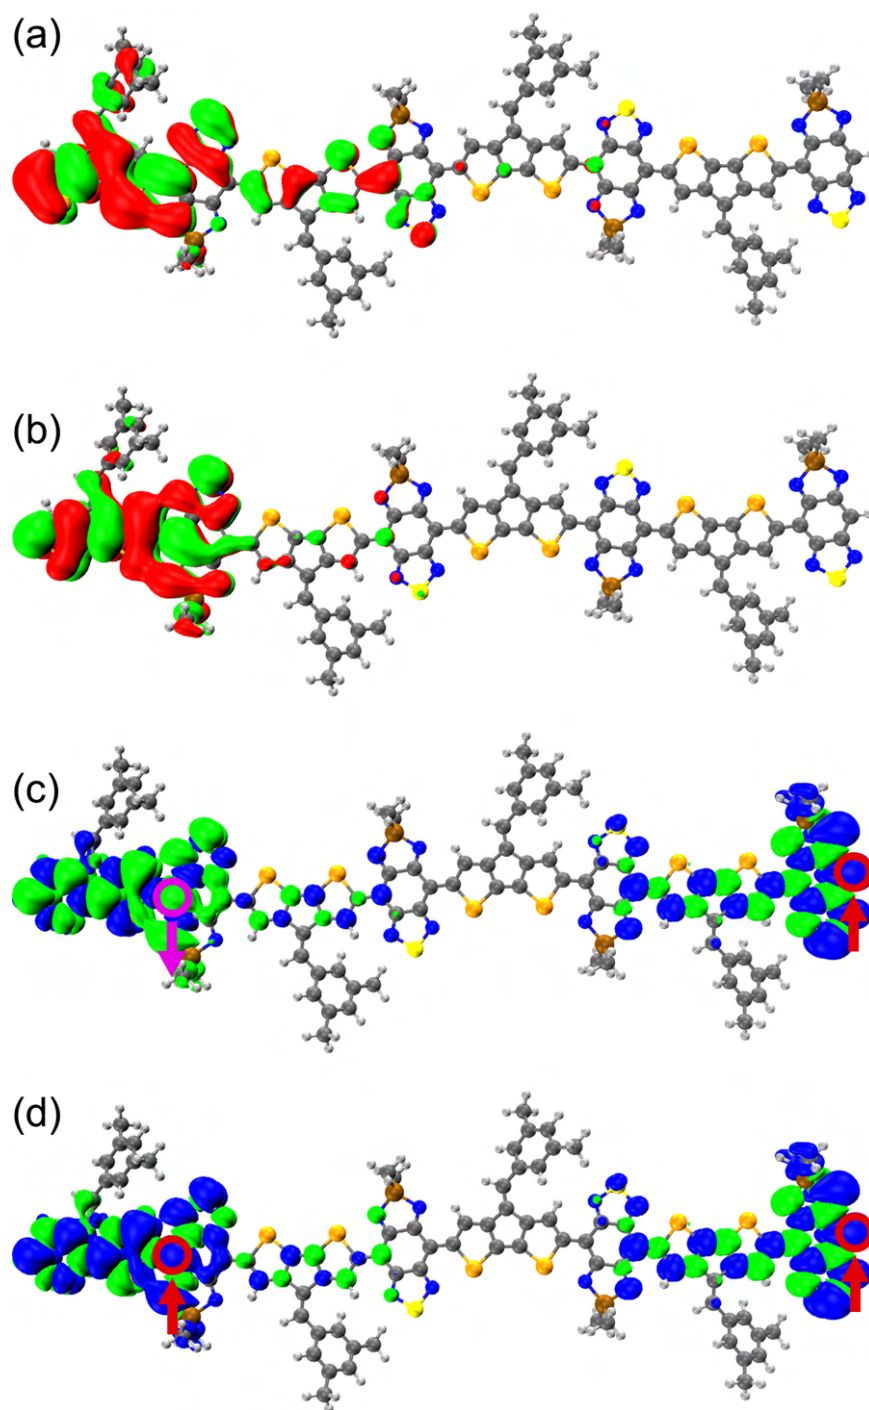

Figure S43: Pictorial representations of the SOMOs with spin density distribution for CPDS-SiBBT tetramer ( $N = 4$ ) at ULC- $\omega$ HPBE level of theory and 6-31G(d,p) basis set. (a)  $\alpha$ -SOMO-3 and (b)  $\beta$ -SOMO of the open-shell singlet ( $S = 0$ ), (c) spin density distribution of the singlet and (d) triplet states ( $S = 1$ ). The green and red surfaces represent positive and negative signs of the MO at isovalue = 0.01 au, respectively. The blue and green surfaces represent positive and negative contributions of the spin density at an isovalue = 0.0002 au. The most probable locations for the unpaired electrons are indicated with up (alpha spin) and down (beta spin) arrows and open circles, respectively. Color codes for the atoms are: gray for C, blue for N, and yellow for S.

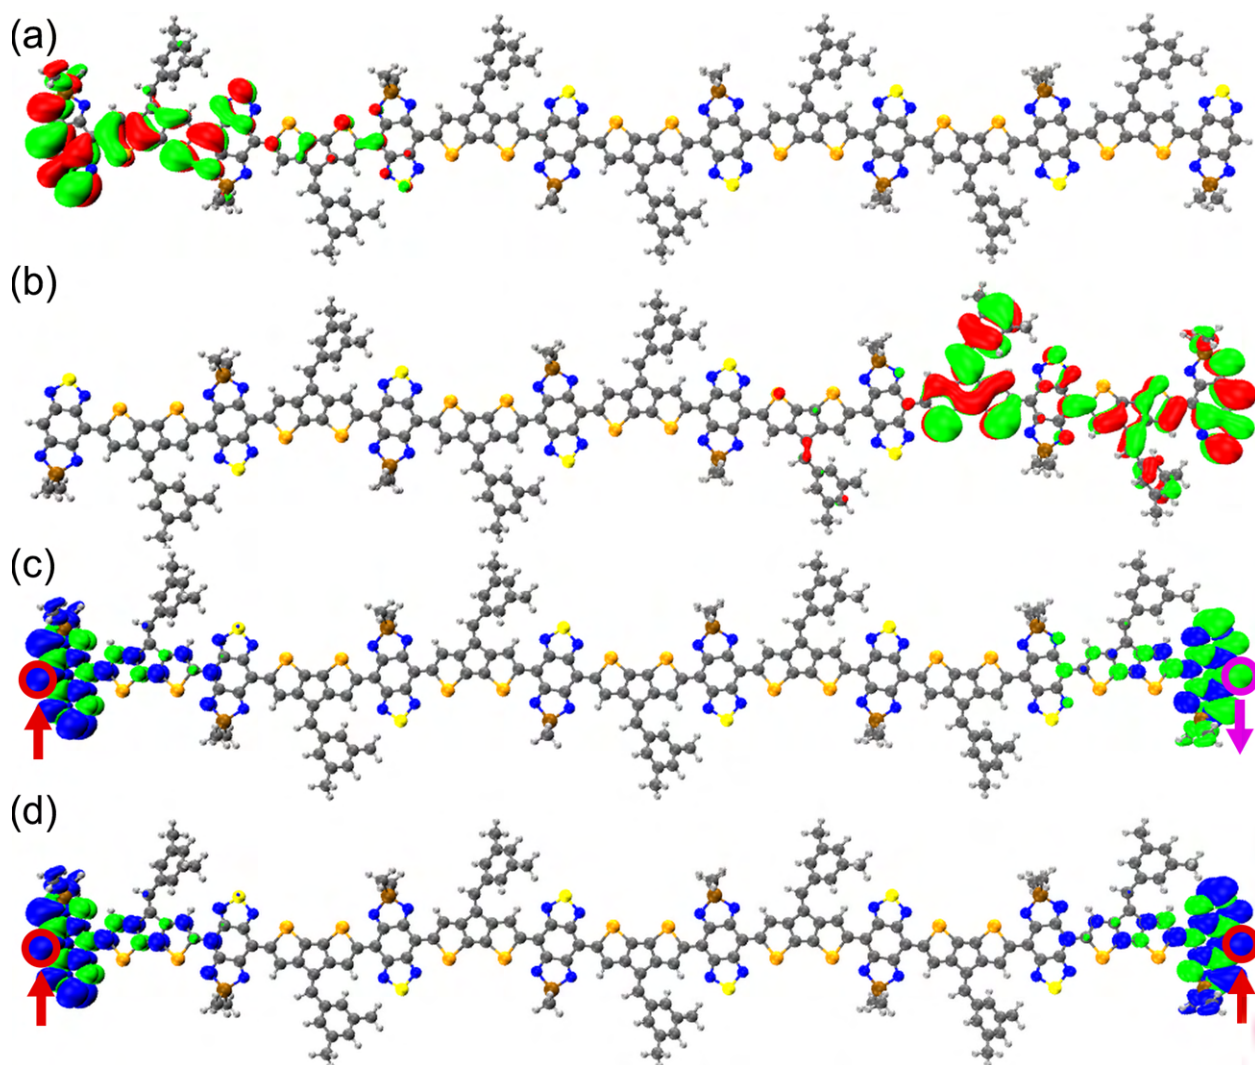

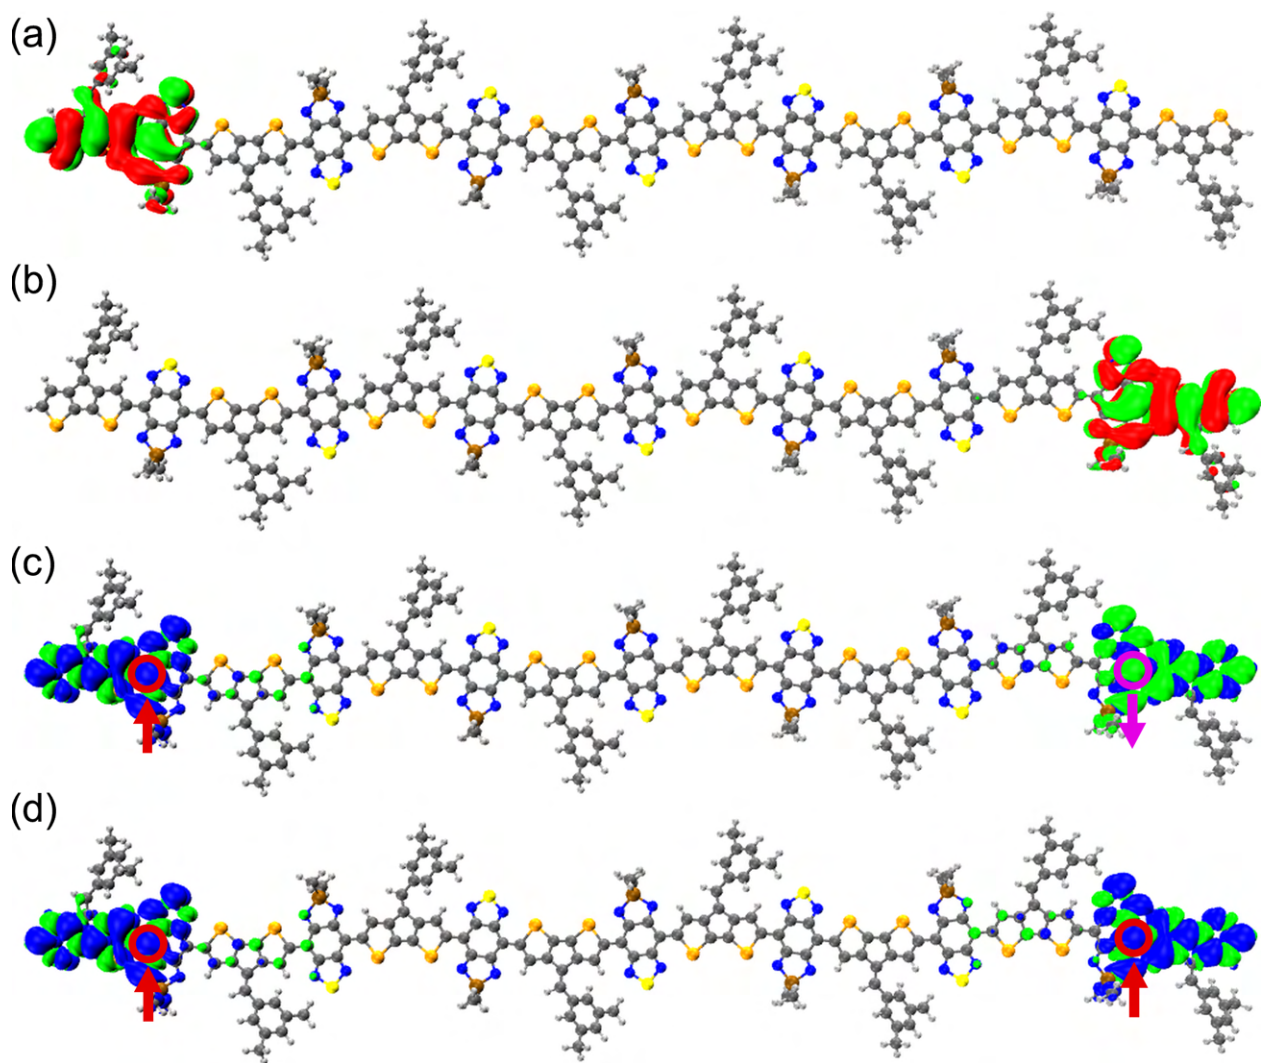

Figure S45: Optimized ground-state geometric structures for the CPDS-SiBBT heptamer ( $N = 7$ ) with end donor units and pictorial representations of the SOMOs with spin density distribution. (a)  $\alpha$ -SOMO and (b)  $\beta$ -SOMO of the open-shell singlet ( $S = 0$ ), (c) spin density distribution of the singlet and (d) triplet states ( $S = 1$ ). The green and red surfaces represent positive and negative signs of the MO at isovalue = 0.01 au, respectively. The blue and green surfaces represent positive and negative contributions of the spin density at an isovalue = 0.0002 au. The most probable locations for the unpaired electrons are indicated with up (alpha spin) and down (beta spin) arrows and open circles, respectively. Color codes for the atoms are: gray for C, blue for N, and yellow for S.

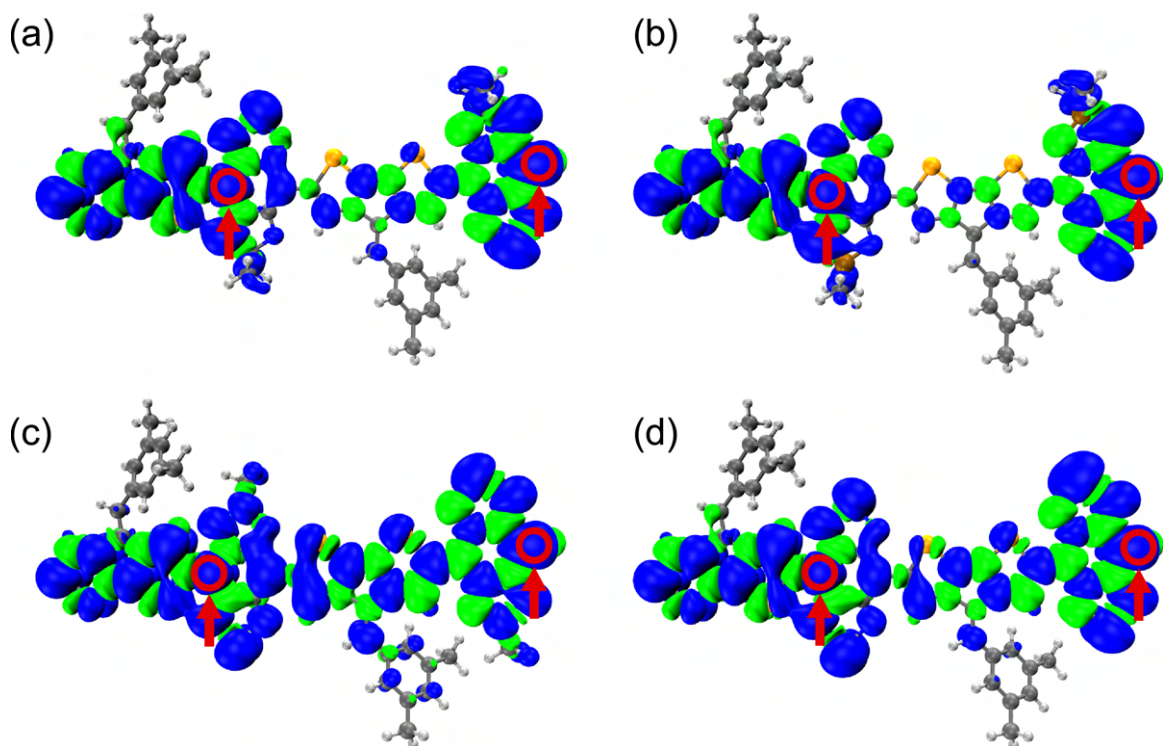

Figure S46: Spin density distributions of the (a) CPDS-CBBT, (b) CPDS-SiBBT, (c) CPDS-NBBT, and (d) CPDS-SeBBT ( $N = 2$ ) polymers in their triplet state ( $S = 1$ ). The blue and green surfaces represent positive and negative contributions of the spin density at an isovalue = 0.0002 au. The most probable locations for the unpaired electrons are highlighted with open circles.

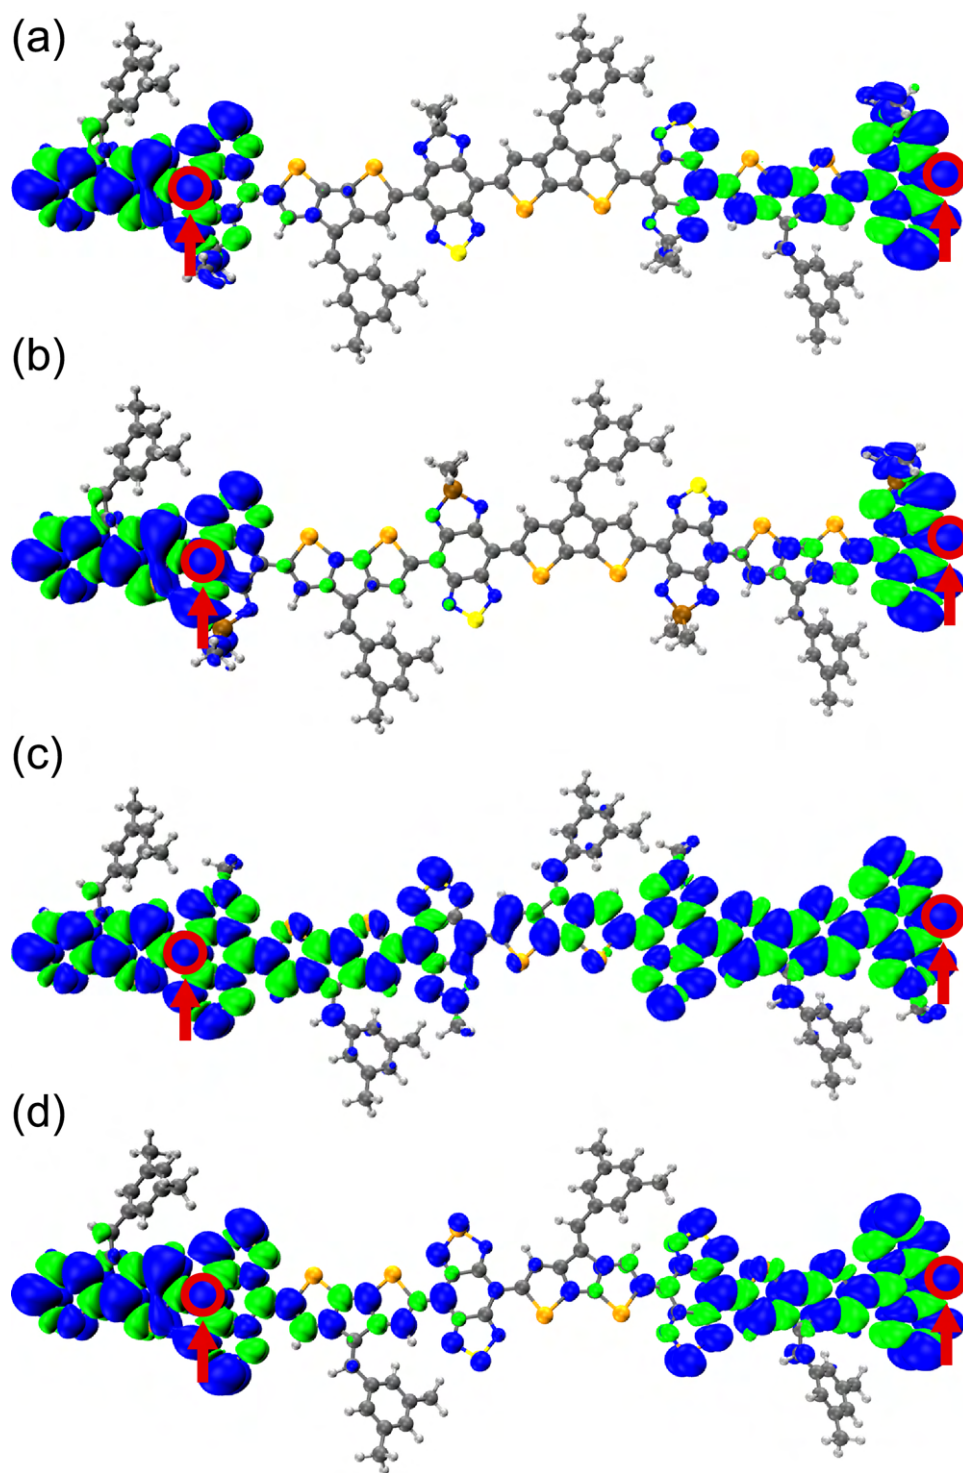

Figure S47: Spin density distributions of the (a) CPDS-CBBT, (b) CPDS-SiBBT, (c) CPDS-NBBT, and (d) CPDS-SeBBT ( $N = 4$ ) polymers in their triplet state ( $S = 1$ ). The blue and green surfaces represent positive and negative contributions of the spin density at an isovalue = 0.0002 au. The most probable locations for the unpaired electrons are highlighted with open circles.

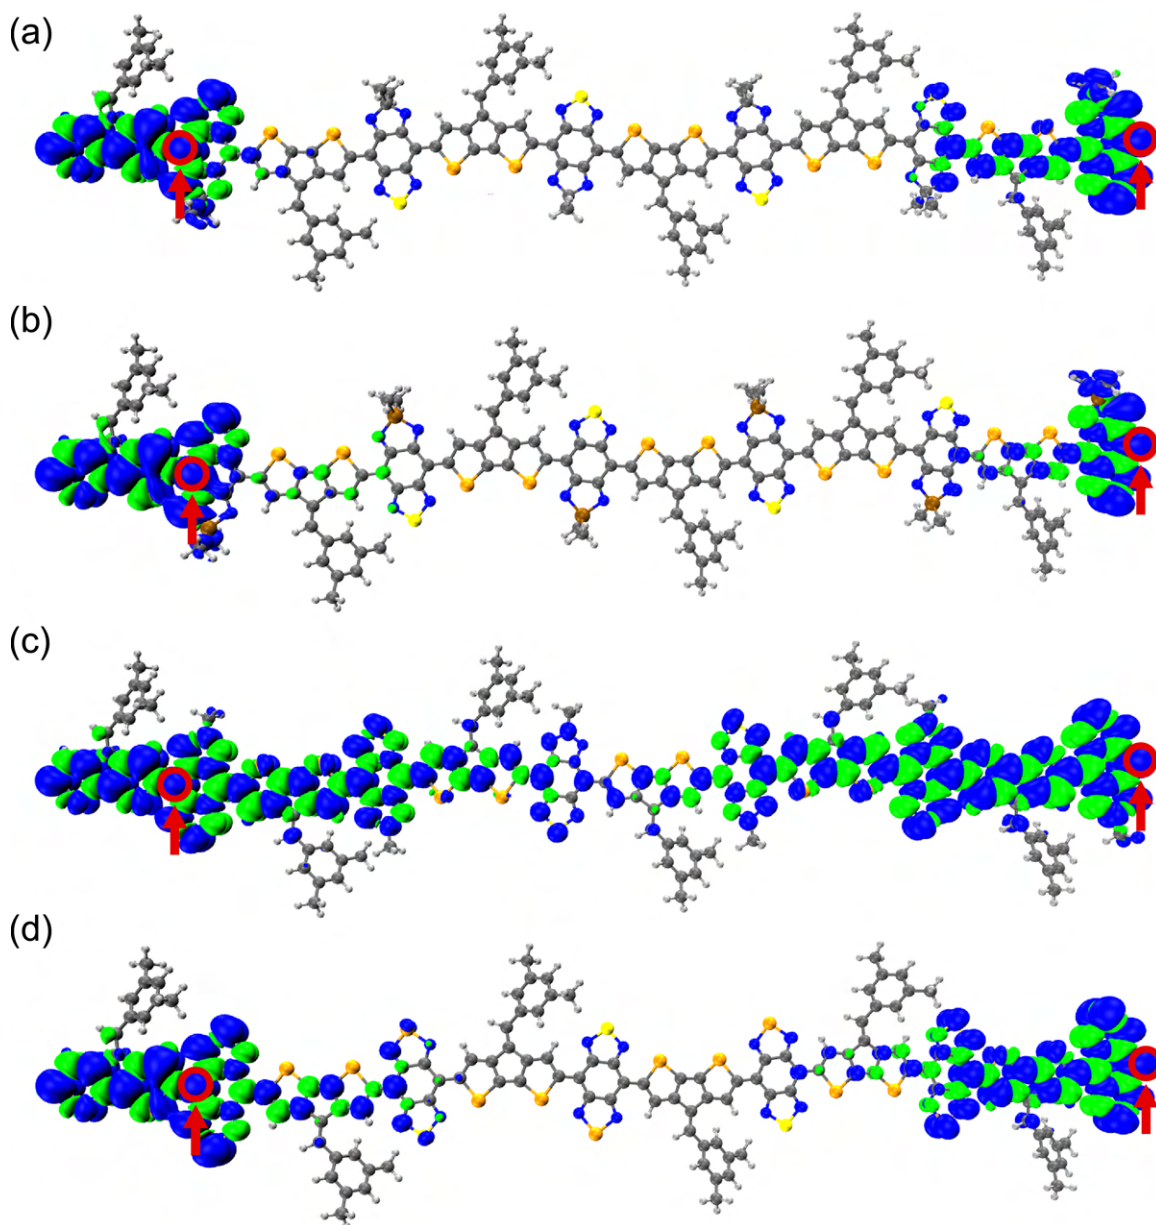

Figure S48: Spin density distributions of the (a) CPDS-CBBT, (b) CPDS-SiBBT, (c) CPDS-NBBT, and (d) CPDS-SeBBT ( $N = 6$ ) polymers in their triplet state ( $S = 1$ ). The blue and green surfaces represent positive and negative contributions of the spin density at an isovalue = 0.0002 au. The most probable locations for the unpaired electrons are highlighted with open circles.

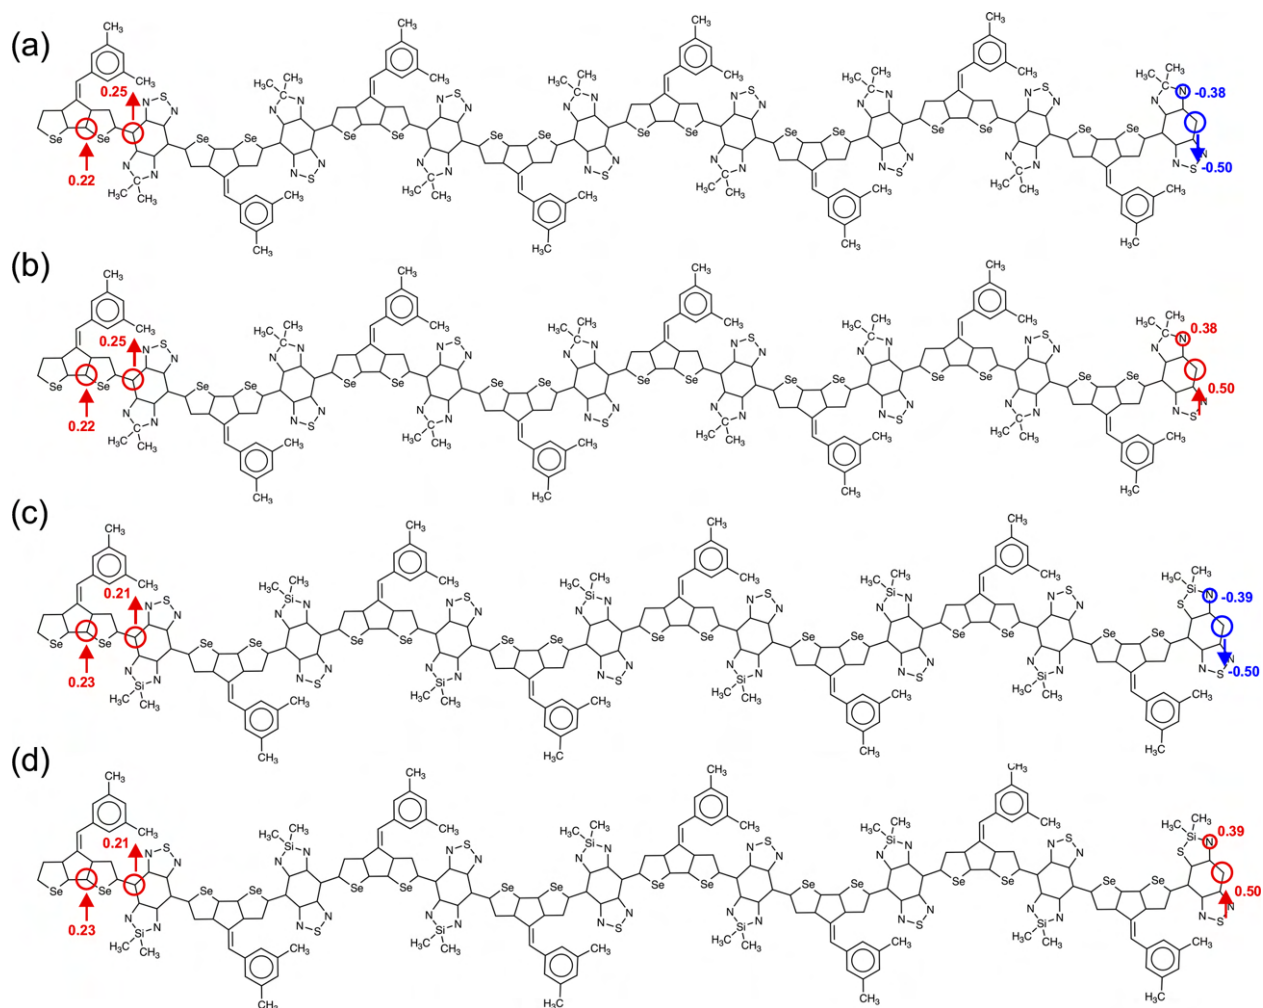

Figure S49: Spin values of the unpaired electrons for CPDS-CBBT ( $N = 8$ ) in the (a) singlet ( $S = 0$ ) and (b) triplet ( $S = 1$ ) states, and for CPDS-SiBBT ( $N = 8$ ) in the (c) singlet ( $S = 0$ ) and (d) triplet ( $S = 1$ ) states. Color code: Red is for spin-up and Blue is for spin-down.



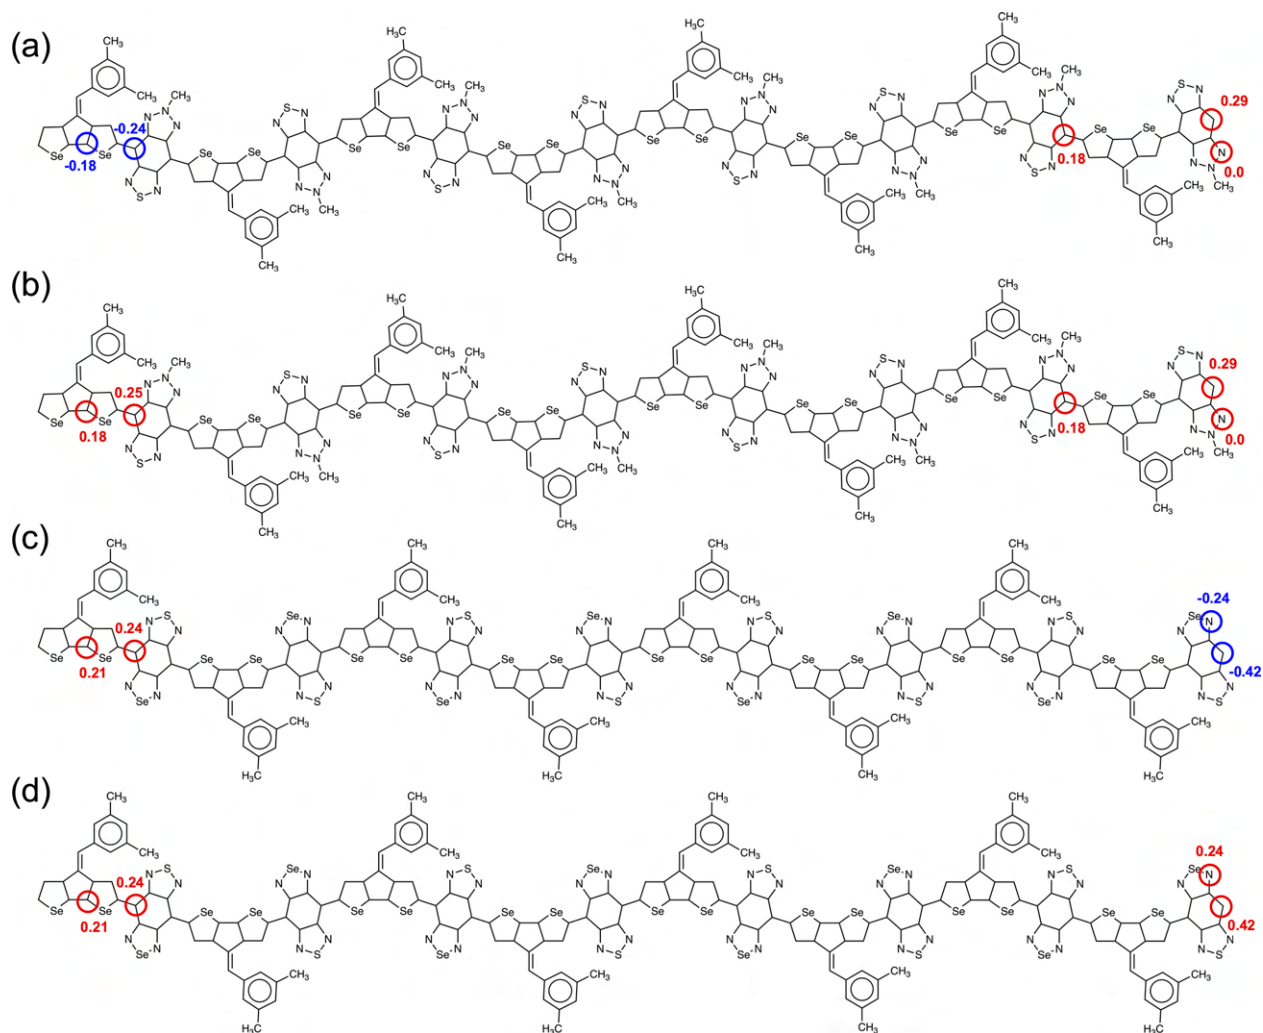

Figure S50: Spin values of the unpaired electrons for CPDS-NBBT ( $N = 8$ ) in the (a) singlet ( $S = 0$ ) and (b) triplet ( $S = 1$ ) states, and for CPDS-SeBBT ( $N = 8$ ) in the (c) singlet ( $S = 0$ ) and (d) triplet ( $S = 1$ ) states. Color code: Red is for spin-up and Blue is for spin-down.

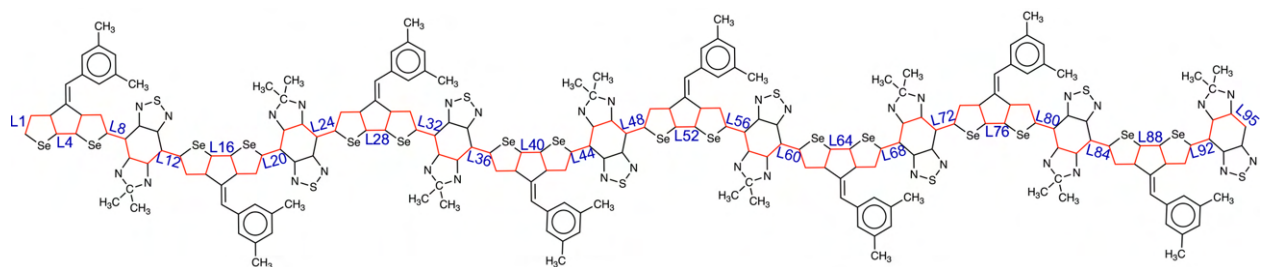

Table S24: Calculated bond lengths (Å) of CPDS-CBBT octamer ( $N = 8$ ) in the singlet and triplet states.

| Bond index | singlet ( $S = 0$ ) | triplet ( $S = 1$ ) | Bond index | singlet ( $S = 0$ ) | triplet ( $S = 1$ ) |
|------------|---------------------|---------------------|------------|---------------------|---------------------|
| 1          | 1.37033             | 1.37032             | 49         | 1.43656             | 1.436560            |
| 2          | 1.42095             | 1.42096             | 50         | 1.36734             | 1.36734             |
| 3          | 1.40139             | 1.40139             | 51         | 1.44630             | 1.44630             |
| 4          | 1.41909             | 1.41911             | 52         | 1.37197             | 1.37197             |
| 5          | 1.41986             | 1.41986             | 53         | 1.45450             | 1.45450             |
| 6          | 1.39418             | 1.39419             | 54         | 1.37052             | 1.37052             |
| 7          | 1.41528             | 1.41527             | 55         | 1.43742             | 1.43742             |
| 8          | 1.40777             | 1.40777             | 56         | 1.38808             | 1.38808             |
| 9          | 1.44354             | 1.44354             | 57         | 1.45012             | 1.45011             |
| 10         | 1.49301             | 1.49301             | 58         | 1.49330             | 1.49330             |
| 11         | 1.46070             | 1.46070             | 59         | 1.46020             | 1.46020             |
| 12         | 1.38695             | 1.38695             | 60         | 1.38746             | 1.38746             |
| 13         | 1.43680             | 1.43679             | 61         | 1.43661             | 1.43662             |
| 14         | 1.36711             | 1.36711             | 62         | 1.36732             | 1.36732             |
| 15         | 1.44652             | 1.44653             | 63         | 1.44632             | 1.44633             |
| 16         | 1.37197             | 1.37197             | 64         | 1.37194             | 1.37194             |
| 17         | 1.45426             | 1.45426             | 65         | 1.45445             | 1.45446             |
| 18         | 1.37075             | 1.37076             | 66         | 1.37059             | 1.37059             |
| 19         | 1.43722             | 1.43723             | 67         | 1.43739             | 1.43739             |
| 20         | 1.38840             | 1.38841             | 68         | 1.38816             | 1.38816             |
| 21         | 1.44984             | 1.44985             | 69         | 1.45004             | 1.45004             |
| 22         | 1.49332             | 1.49332             | 70         | 1.49327             | 1.49327             |
| 23         | 1.46028             | 1.46028             | 71         | 1.46038             | 1.46038             |
| 24         | 1.38739             | 1.38739             | 72         | 1.38725             | 1.38725             |
| 25         | 1.43663             | 1.43663             | 73         | 1.43675             | 1.43675             |
| 26         | 1.36727             | 1.36727             | 74         | 1.36718             | 1.36717             |
| 27         | 1.44633             | 1.44633             | 75         | 1.44648             | 1.44648             |
| 28         | 1.37199             | 1.37200             | 76         | 1.37196             | 1.37195             |
| 29         | 1.45442             | 1.45443             | 77         | 1.45434             | 1.45433             |
| 30         | 1.37058             | 1.37058             | 78         | 1.37070             | 1.37070             |
| 31         | 1.43735             | 1.43735             | 79         | 1.43719             | 1.43719             |
| 32         | 1.38816             | 1.38816             | 80         | 1.38845             | 1.38845             |
| 33         | 1.45005             | 1.45005             | 81         | 1.44980             | 1.44980             |
| 34         | 1.49331             | 1.49331             | 82         | 1.49326             | 1.49327             |
| 35         | 1.46017             | 1.46018             | 83         | 1.46091             | 1.46091             |
| 36         | 1.38751             | 1.38751             | 84         | 1.38680             | 1.38680             |
| 37         | 1.43658             | 1.43658             | 85         | 1.43704             | 1.43704             |
| 38         | 1.36735             | 1.36735             | 86         | 1.36702             | 1.36703             |
| 39         | 1.44628             | 1.44628             | 87         | 1.44655             | 1.44654             |
| 40         | 1.37195             | 1.37195             | 88         | 1.37252             | 1.37253             |
| 41         | 1.45448             | 1.45448             | 89         | 1.45354             | 1.45354             |
| 42         | 1.37055             | 1.37055             | 90         | 1.37204             | 1.37205             |
| 43         | 1.43744             | 1.43744             | 91         | 1.43514             | 1.43513             |
| 44         | 1.38808             | 1.38807             | 92         | 1.39118             | 1.39118             |
| 45         | 1.45012             | 1.45011             | 93         | 1.45250             | 1.45252             |
| 46         | 1.49329             | 1.49329             | 94         | 1.48662             | 1.48662             |
| 47         | 1.46015             | 1.46015             | 95         | 1.41289             | 1.41288             |
| 48         | 1.38752             | 1.38751             |            |                     |                     |

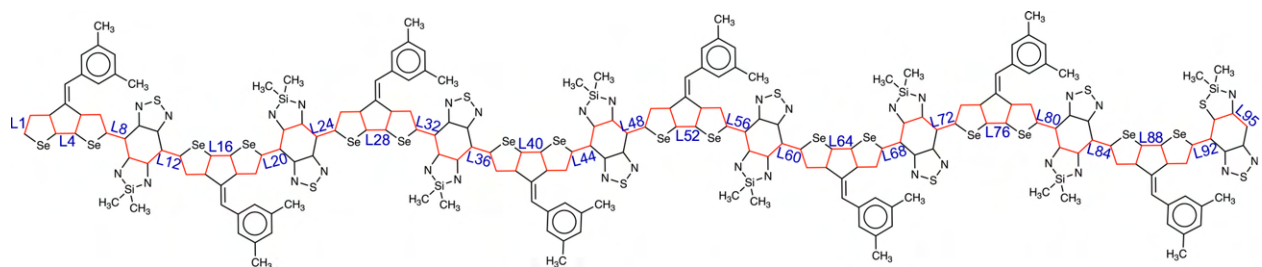

Table S25: Calculated bond lengths (Å) of CPDS-SiBBT octamer ( $N = 8$ ) in the singlet and triplet states.

| Bond index | singlet ( $S = 0$ ) | triplet ( $S = 1$ ) | Bond index | singlet ( $S = 0$ ) | triplet ( $S = 1$ ) |
|------------|---------------------|---------------------|------------|---------------------|---------------------|
| 1          | 1.37085             | 1.37085             | 49         | 1.43670             | 1.43670             |
| 2          | 1.42028             | 1.42028             | 50         | 1.36706             | 1.36706             |
| 3          | 1.40294             | 1.40294             | 51         | 1.44609             | 1.44609             |
| 4          | 1.41726             | 1.41725             | 52         | 1.37243             | 1.37243             |
| 5          | 1.42204             | 1.42204             | 53         | 1.45418             | 1.45418             |
| 6          | 1.39195             | 1.39194             | 54         | 1.37070             | 1.37070             |
| 7          | 1.41795             | 1.41795             | 55         | 1.43772             | 1.43772             |
| 8          | 1.40761             | 1.40762             | 56         | 1.39162             | 1.39162             |
| 9          | 1.44795             | 1.44795             | 57         | 1.45355             | 1.45355             |
| 10         | 1.54422             | 1.54422             | 58         | 1.54599             | 1.54599             |
| 11         | 1.47092             | 1.47092             | 59         | 1.46963             | 1.46963             |
| 12         | 1.39148             | 1.39147             | 60         | 1.39257             | 1.39257             |
| 13         | 1.43726             | 1.43726             | 61         | 1.43675             | 1.43675             |
| 14         | 1.36658             | 1.36658             | 62         | 1.36703             | 1.36703             |
| 15         | 1.44646             | 1.44646             | 63         | 1.44613             | 1.44613             |
| 16         | 1.37242             | 1.37242             | 64         | 1.37242             | 1.37242             |
| 17         | 1.45383             | 1.45383             | 65         | 1.45415             | 1.45415             |
| 18         | 1.37105             | 1.37105             | 66         | 1.37075             | 1.37074             |
| 19         | 1.43731             | 1.43731             | 67         | 1.43767             | 1.43767             |
| 20         | 1.39220             | 1.39220             | 68         | 1.39171             | 1.39171             |
| 21         | 1.45291             | 1.45291             | 69         | 1.45346             | 1.45346             |
| 22         | 1.54595             | 1.54595             | 70         | 1.54598             | 1.54598             |
| 23         | 1.46986             | 1.46986             | 71         | 1.46990             | 1.46990             |
| 24         | 1.39239             | 1.39239             | 72         | 1.39234             | 1.39234             |
| 25         | 1.43683             | 1.43683             | 73         | 1.43690             | 1.43690             |
| 26         | 1.36695             | 1.36695             | 74         | 1.36690             | 1.36690             |
| 27         | 1.44616             | 1.44616             | 75         | 1.44626             | 1.44626             |
| 28         | 1.37246             | 1.37246             | 76         | 1.37242             | 1.37242             |
| 29         | 1.45407             | 1.45407             | 77         | 1.45402             | 1.45402             |
| 30         | 1.37080             | 1.37080             | 78         | 1.37089             | 1.37089             |
| 31         | 1.43760             | 1.43760             | 79         | 1.43746             | 1.43746             |
| 32         | 1.39176             | 1.39176             | 80         | 1.39204             | 1.39204             |
| 33         | 1.45339             | 1.45339             | 81         | 1.45311             | 1.45311             |
| 34         | 1.54597             | 1.54598             | 82         | 1.54603             | 1.54603             |
| 35         | 1.46962             | 1.46962             | 83         | 1.47077             | 1.47077             |
| 36         | 1.39259             | 1.39259             | 84         | 1.39149             | 1.39149             |
| 37         | 1.43672             | 1.43672             | 85         | 1.43754             | 1.43754             |
| 38         | 1.36704             | 1.36704             | 86         | 1.36639             | 1.36639             |
| 39         | 1.44609             | 1.44609             | 87         | 1.44680             | 1.44680             |
| 40         | 1.37243             | 1.37243             | 88         | 1.37224             | 1.37223             |
| 41         | 1.45417             | 1.45417             | 89         | 1.45386             | 1.45386             |
| 42         | 1.37072             | 1.37072             | 90         | 1.37149             | 1.37148             |
| 43         | 1.43771             | 1.43771             | 91         | 1.43641             | 1.43641             |
| 44         | 1.39163             | 1.39163             | 92         | 1.39318             | 1.39318             |
| 45         | 1.45354             | 1.45354             | 93         | 1.45844             | 1.45844             |
| 46         | 1.54598             | 1.54598             | 94         | 1.53065             | 1.53065             |
| 47         | 1.46957             | 1.46957             | 95         | 1.41852             | 1.41852             |
| 48         | 1.39263             | 1.39263             |            |                     |                     |

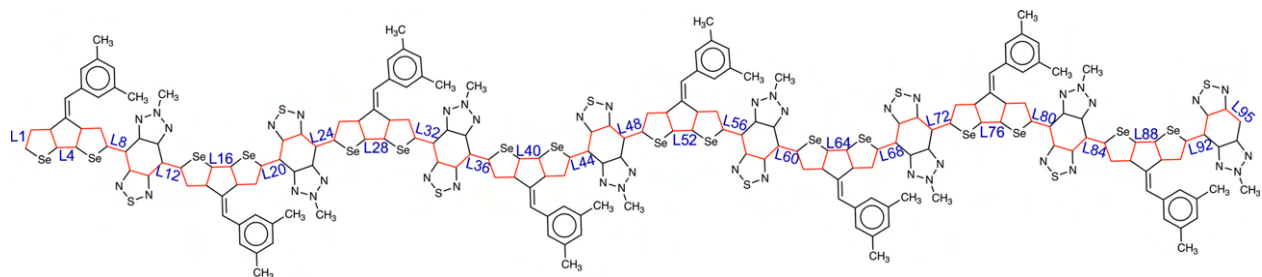

Table S26: Calculated bond lengths (Å) of CPDS-NBBT octamer ( $N = 8$ ) in the singlet and triplet states.

| Bond index | singlet ( $S = 0$ ) | triplet ( $S = 1$ ) | Bond index | singlet ( $S = 0$ ) | triplet ( $S = 1$ ) |
|------------|---------------------|---------------------|------------|---------------------|---------------------|
| 1          | 1.36931             | 1.36932             | 49         | 1.43165             | 1.43179             |
| 2          | 1.42243             | 1.42243             | 50         | 1.37088             | 1.37075             |
| 3          | 1.39750             | 1.39752             | 51         | 1.44118             | 1.44135             |
| 4          | 1.42642             | 1.42640             | 52         | 1.37677             | 1.37659             |
| 5          | 1.41104             | 1.41107             | 53         | 1.44840             | 1.44856             |
| 6          | 1.40097             | 1.40094             | 54         | 1.37287             | 1.37274             |
| 7          | 1.40569             | 1.40573             | 55         | 1.43271             | 1.43286             |
| 8          | 1.41838             | 1.41833             | 56         | 1.39013             | 1.38997             |
| 9          | 1.43572             | 1.43576             | 57         | 1.44840             | 1.44849             |
| 10         | 1.43082             | 1.43079             | 58         | 1.42588             | 1.42583             |
| 11         | 1.43528             | 1.43533             | 59         | 1.44288             | 1.44297             |
| 12         | 1.40184             | 1.40173             | 60         | 1.39114             | 1.39099             |
| 13         | 1.42283             | 1.42292             | 61         | 1.43145             | 1.43159             |
| 14         | 1.37789             | 1.37780             | 62         | 1.37104             | 1.37091             |
| 15         | 1.43343             | 1.43355             | 63         | 1.44090             | 1.44106             |
| 16         | 1.38490             | 1.38477             | 64         | 1.37725             | 1.37707             |
| 17         | 1.44191             | 1.44203             | 65         | 1.44790             | 1.44806             |
| 18         | 1.37739             | 1.37729             | 66         | 1.37333             | 1.37321             |
| 19         | 1.42809             | 1.42821             | 67         | 1.43213             | 1.43227             |
| 20         | 1.39470             | 1.39458             | 68         | 1.39087             | 1.39072             |
| 21         | 1.44642             | 1.44650             | 69         | 1.44783             | 1.44792             |
| 22         | 1.42663             | 1.42659             | 70         | 1.42617             | 1.42613             |
| 23         | 1.44176             | 1.44184             | 71         | 1.44219             | 1.44227             |
| 24         | 1.39261             | 1.39247             | 72         | 1.39284             | 1.39270             |
| 25         | 1.43031             | 1.43044             | 73         | 1.42979             | 1.42991             |
| 26         | 1.37194             | 1.37182             | 74         | 1.37267             | 1.37256             |
| 27         | 1.44001             | 1.44016             | 75         | 1.43853             | 1.43867             |
| 28         | 1.37794             | 1.37777             | 76         | 1.38038             | 1.38022             |
| 29         | 1.44746             | 1.44762             | 77         | 1.44476             | 1.44489             |
| 30         | 1.37349             | 1.37336             | 78         | 1.37620             | 1.37610             |
| 31         | 1.43209             | 1.43224             | 79         | 1.42857             | 1.42869             |
| 32         | 1.39070             | 1.39055             | 80         | 1.39522             | 1.39510             |
| 33         | 1.44820             | 1.44829             | 81         | 1.44451             | 1.44458             |
| 34         | 1.42597             | 1.42593             | 82         | 1.42816             | 1.42813             |
| 35         | 1.44279             | 1.44288             | 83         | 1.43769             | 1.43776             |
| 36         | 1.39119             | 1.39103             | 84         | 1.40410             | 1.40401             |
| 37         | 1.43147             | 1.43162             | 85         | 1.41934             | 1.41941             |
| 38         | 1.37099             | 1.37087             | 86         | 1.38312             | 1.38305             |
| 39         | 1.44106             | 1.44122             | 87         | 1.42415             | 1.42422             |
| 40         | 1.37689             | 1.37670             | 88         | 1.39897             | 1.39888             |
| 41         | 1.44835             | 1.44852             | 89         | 1.42802             | 1.42809             |
| 42         | 1.37285             | 1.37273             | 90         | 1.39210             | 1.39206             |
| 43         | 1.43270             | 1.43285             | 91         | 1.40925             | 1.40929             |
| 44         | 1.39008             | 1.38992             | 92         | 1.42058             | 1.42053             |
| 45         | 1.44845             | 1.44855             | 93         | 1.42963             | 1.42966             |
| 46         | 1.42585             | 1.42581             | 94         | 1.44267             | 1.44266             |
| 47         | 1.44295             | 1.44304             | 95         | 1.39839             | 1.39841             |
| 48         | 1.39098             | 1.39082             |            |                     |                     |

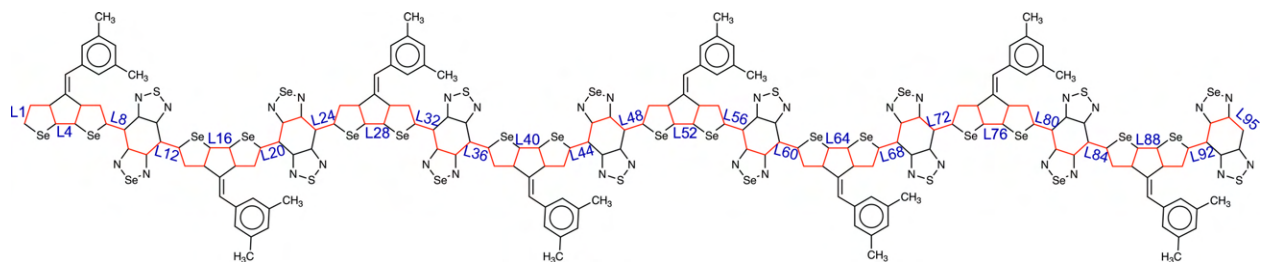

Table S27: Calculated bond lengths (Å) of CPDS-SeBBT octamer ( $N = 8$ ) in the singlet and triplet states.

| Bond index | singlet ( $S = 0$ ) | triplet ( $S = 1$ ) | Bond index | singlet ( $S = 0$ ) | triplet ( $S = 1$ ) |
|------------|---------------------|---------------------|------------|---------------------|---------------------|
| 1          | 1.37006             | 1.37006             | 49         | 1.43483             | 1.43483             |
| 2          | 1.42137             | 1.42138             | 50         | 1.36904             | 1.36904             |
| 3          | 1.40040             | 1.40040             | 51         | 1.44261             | 1.44261             |
| 4          | 1.42063             | 1.42063             | 52         | 1.37435             | 1.37435             |
| 5          | 1.41694             | 1.41694             | 53         | 1.45108             | 1.45108             |
| 6          | 1.39594             | 1.39593             | 54         | 1.37194             | 1.37194             |
| 7          | 1.41377             | 1.41377             | 55         | 1.43650             | 1.43650             |
| 8          | 1.41465             | 1.41465             | 56         | 1.39339             | 1.39340             |
| 9          | 1.44790             | 1.44790             | 57         | 1.45631             | 1.45631             |
| 10         | 1.46163             | 1.46163             | 58         | 1.46041             | 1.46041             |
| 11         | 1.44946             | 1.44945             | 59         | 1.45071             | 1.45072             |
| 12         | 1.39416             | 1.39416             | 60         | 1.39339             | 1.39339             |
| 13         | 1.43421             | 1.43420             | 61         | 1.43490             | 1.43491             |
| 14         | 1.36936             | 1.36936             | 62         | 1.36895             | 1.36895             |
| 15         | 1.44234             | 1.44234             | 63         | 1.44270             | 1.44270             |
| 16         | 1.37476             | 1.37477             | 64         | 1.37435             | 1.37435             |
| 17         | 1.45073             | 1.45073             | 65         | 1.45103             | 1.45103             |
| 18         | 1.37218             | 1.37218             | 66         | 1.37200             | 1.37200             |
| 19         | 1.43625             | 1.43625             | 67         | 1.43641             | 1.43641             |
| 20         | 1.39367             | 1.39367             | 68         | 1.39353             | 1.39353             |
| 21         | 1.45619             | 1.45619             | 69         | 1.45620             | 1.45619             |
| 22         | 1.46050             | 1.46050             | 70         | 1.46034             | 1.46034             |
| 23         | 1.45065             | 1.45065             | 71         | 1.45091             | 1.45091             |
| 24         | 1.39348             | 1.39348             | 72         | 1.39310             | 1.39309             |
| 25         | 1.43483             | 1.43483             | 73         | 1.43512             | 1.43512             |
| 26         | 1.36903             | 1.36903             | 74         | 1.36878             | 1.36878             |
| 27         | 1.44259             | 1.44259             | 75         | 1.44290             | 1.44290             |
| 28         | 1.37439             | 1.37439             | 76         | 1.37436             | 1.37435             |
| 29         | 1.45104             | 1.45104             | 77         | 1.45081             | 1.45081             |
| 30         | 1.37196             | 1.37196             | 78         | 1.37225             | 1.37225             |
| 31         | 1.43647             | 1.43647             | 79         | 1.43609             | 1.43609             |
| 32         | 1.39340             | 1.39340             | 80         | 1.39406             | 1.39406             |
| 33         | 1.45632             | 1.45632             | 81         | 1.45572             | 1.45572             |
| 34         | 1.46047             | 1.46047             | 82         | 1.46027             | 1.46027             |
| 35         | 1.45063             | 1.45063             | 83         | 1.45082             | 1.45082             |
| 36         | 1.39353             | 1.39353             | 84         | 1.39436             | 1.39436             |
| 37         | 1.43480             | 1.43480             | 85         | 1.43364             | 1.43364             |
| 38         | 1.36905             | 1.36905             | 86         | 1.37036             | 1.37036             |
| 39         | 1.44258             | 1.44258             | 87         | 1.44036             | 1.44036             |
| 40         | 1.37437             | 1.37437             | 88         | 1.37861             | 1.37861             |
| 41         | 1.45110             | 1.45110             | 89         | 1.44649             | 1.44649             |
| 42         | 1.37192             | 1.37192             | 90         | 1.37704             | 1.37704             |
| 43         | 1.43651             | 1.43651             | 91         | 1.42928             | 1.42928             |
| 44         | 1.39336             | 1.39335             | 92         | 1.40292             | 1.40291             |
| 45         | 1.45634             | 1.45634             | 93         | 1.45400             | 1.45400             |
| 46         | 1.46044             | 1.46044             | 94         | 1.46899             | 1.46899             |
| 47         | 1.45065             | 1.45064             | 95         | 1.40927             | 1.40928             |
| 48         | 1.39350             | 1.39350             |            |                     |                     |

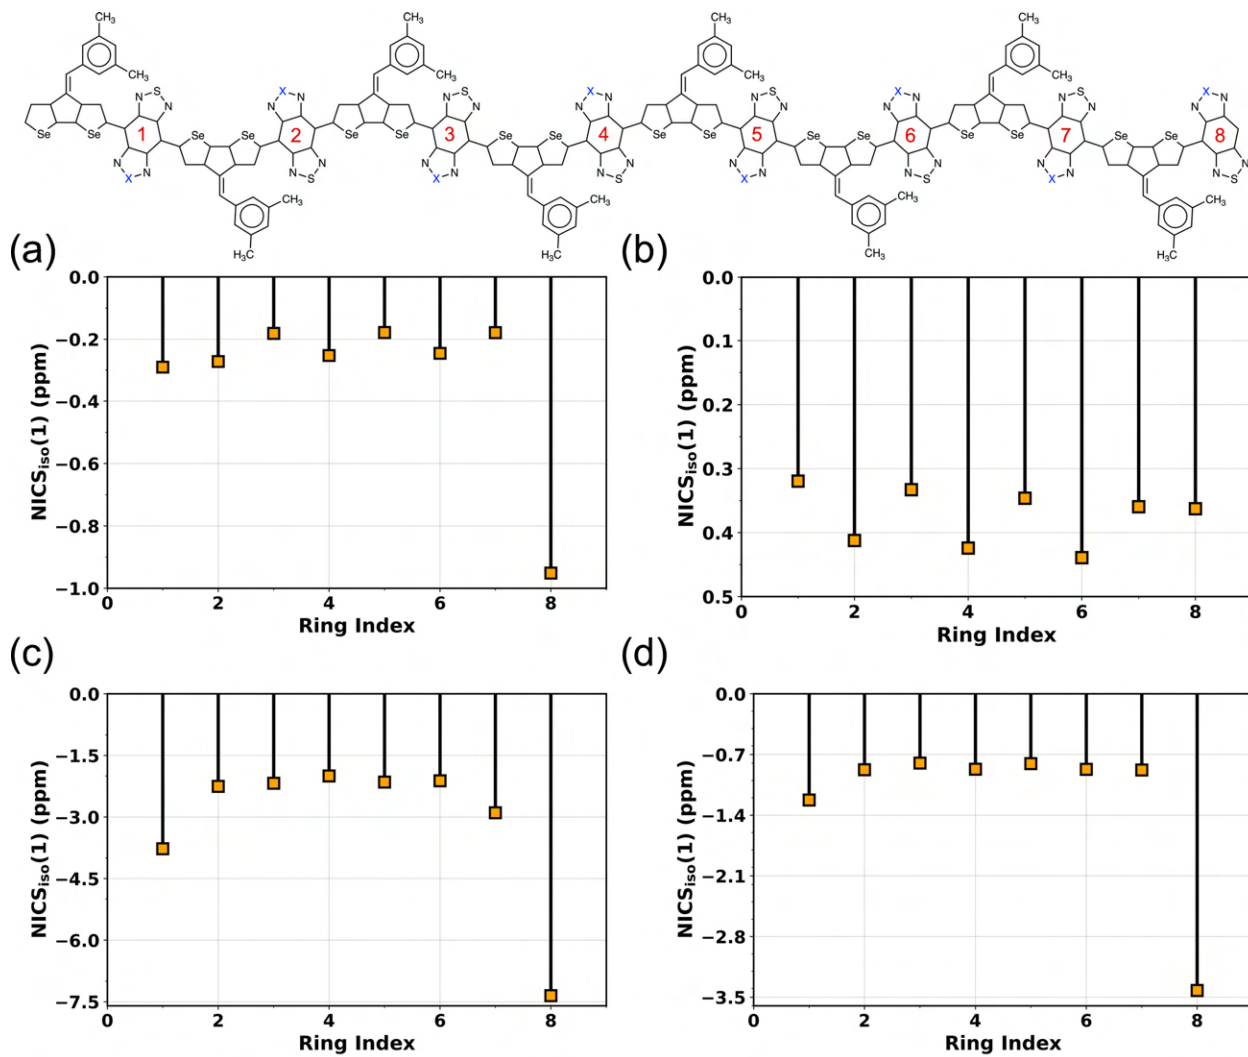

Figure S51: Calculated  $\text{NICS}_{\text{iso}}(1)$  (ppm) of the benzenoid rings along the (a) CPDS-CBBT, (b) CPDS-SiBBT, (c) CPDS-NBBT, and (d) CPDS-SeBBT polymer backbones in their singlet state.

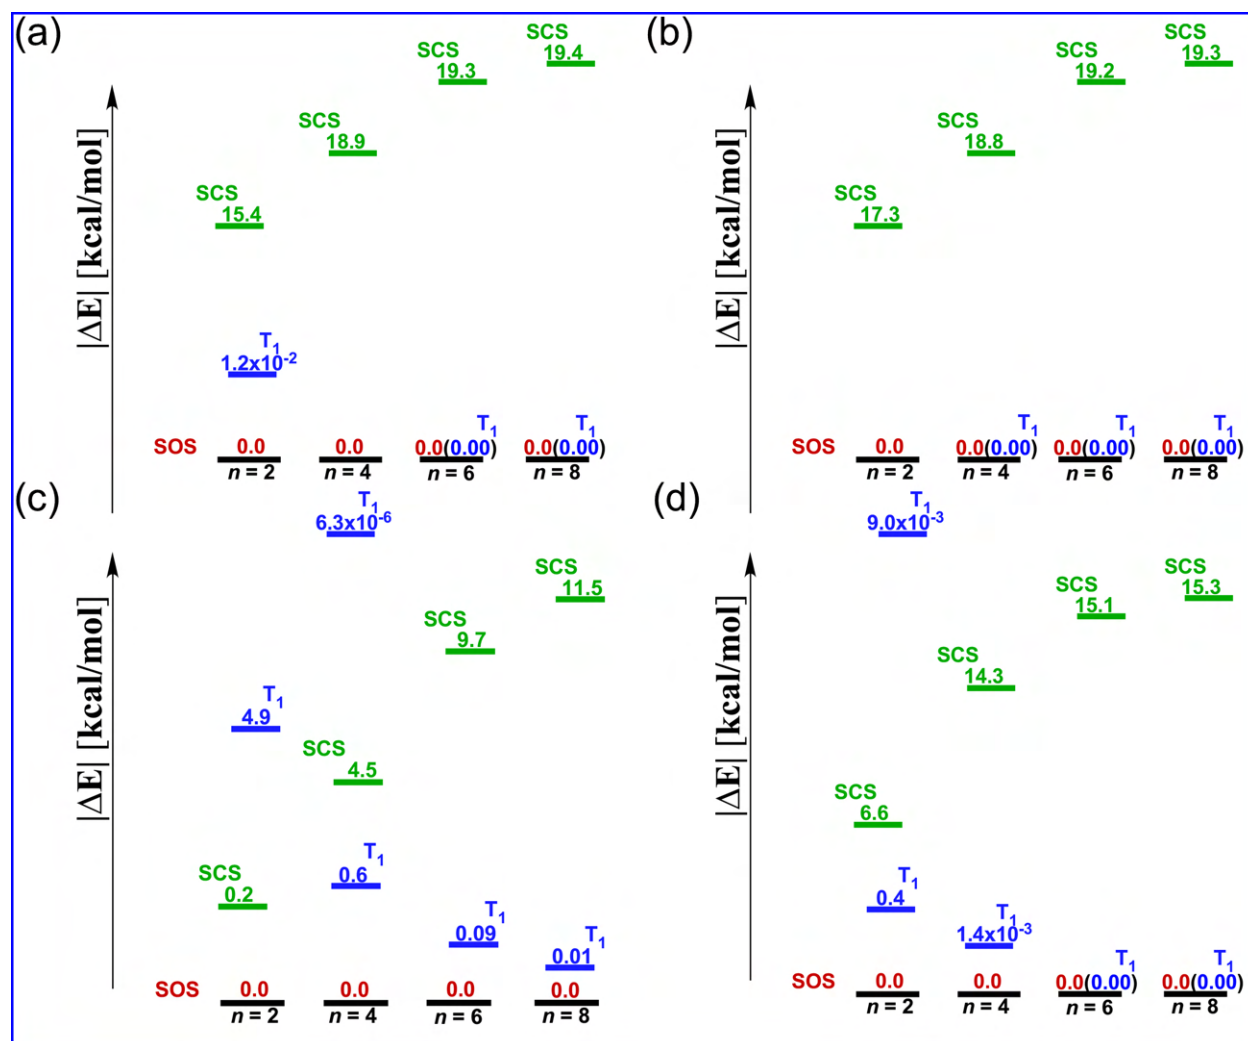

Figure S52: Energy diagrams of the (a) CPDS-CBBT, (b) CPDS-SiBBT, (c) CPDS-NBBT, and (d) CPDS-SeBBT polymers as a function of oligomer chain lengths. Energy values are provided with reference to the singlet open-shell (SOS) and compared with the singlet closed-shell (SCS) and triplet ( $T_1$ ) states.

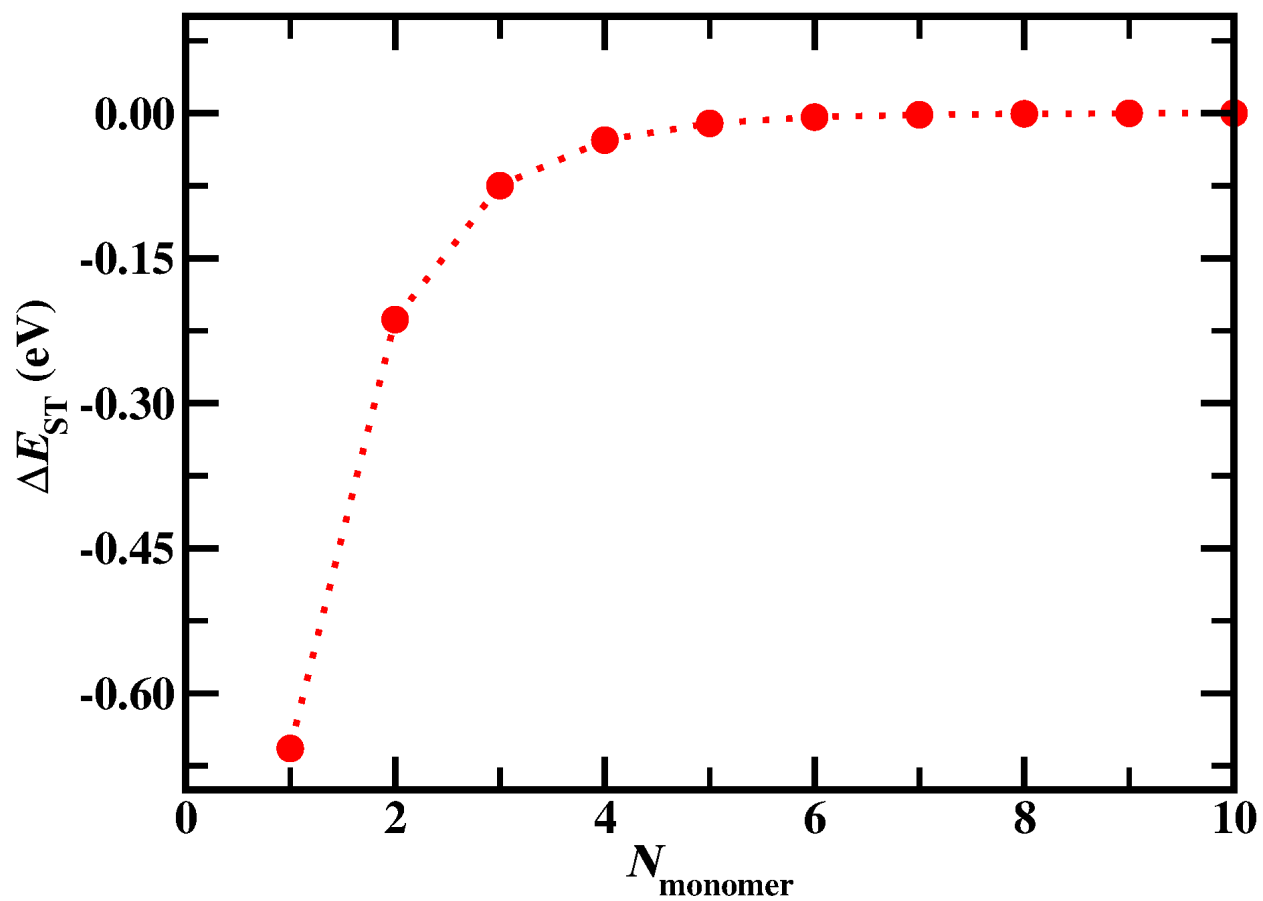

Figure S53: Calculated  $\Delta E_{ST}$  of the CPDS-NBBT polymer as a function of  $N$  showing as  $N$  increases,  $\Delta E_{ST}$  decreases. From extrapolation of these data, an inflection point is achieved at  $N = 9$  (shown with the vertical line).



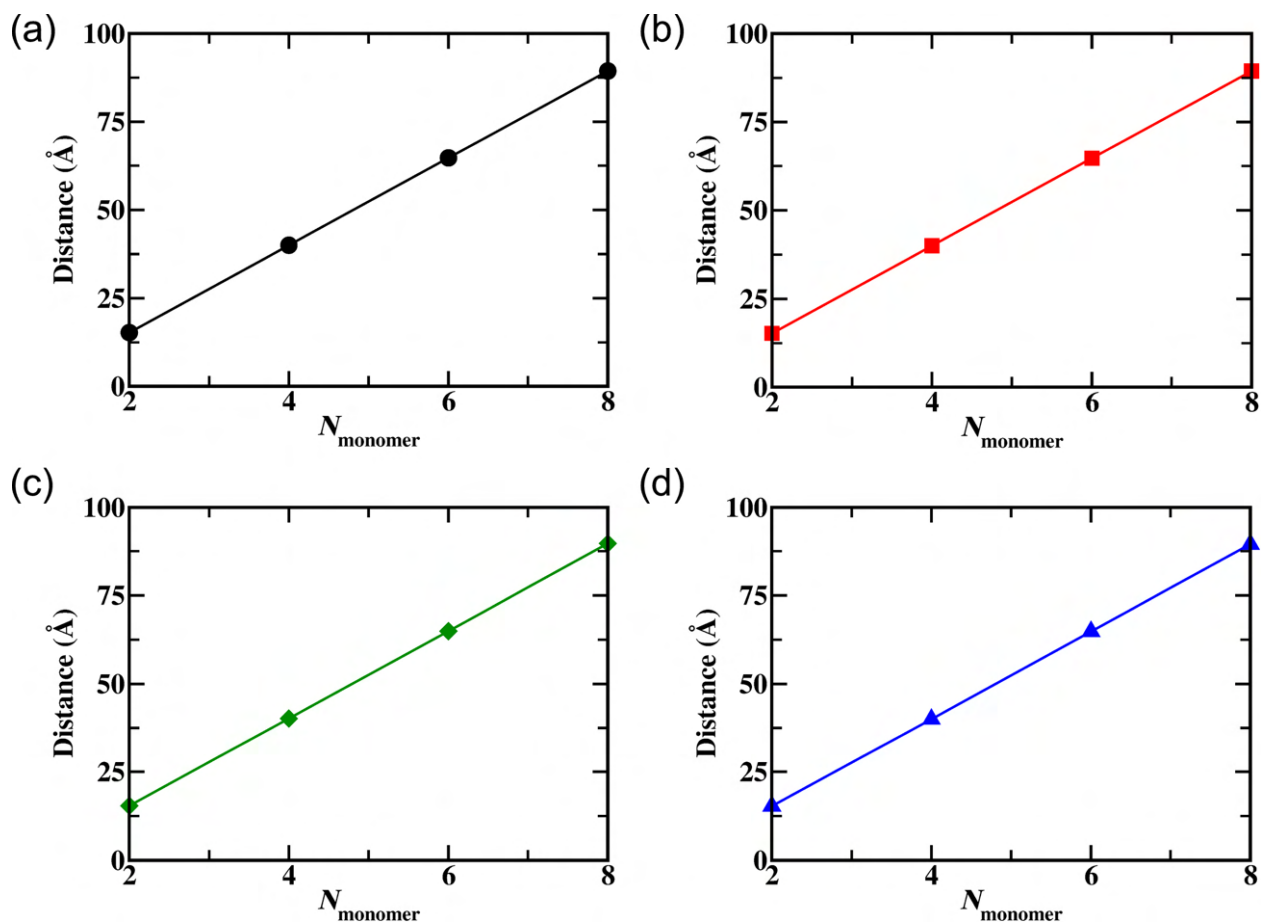

Figure S54: Separation between the unpaired electrons as a function of polymer chain length for (a) CPDS-CBBT, (b) CPDS-SiBBT, (c) CPDS-NBBT, and (d) CPDS-SeBBT in the singlet state ( $S = 0$ ). As a greater number of monomer units are added to the polymer backbone, a rapid increase in the distance between the unpaired electrons is observed.

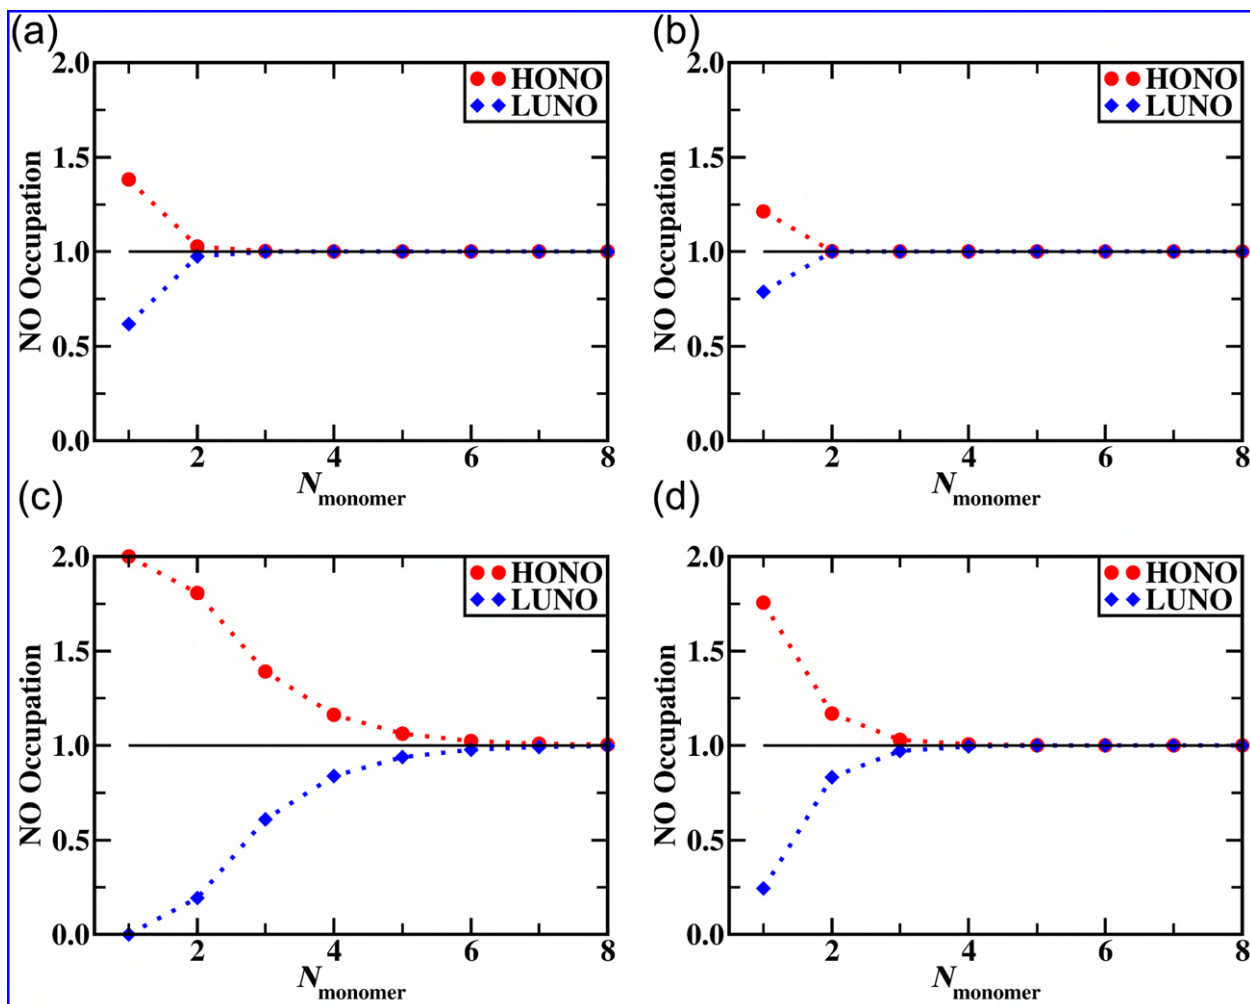

Figure S55: Calculated occupation numbers of the highest occupied natural orbital (HONO) and lowest unoccupied natural orbital (LUNO) of (a) CPDS-CBBT, (b) CPDS-SiBBT, (c) CPDS-NBBT, and (d) CPDS-SeBBT polymers, obtained as a function of oligomer length ( $N$ ). As more monomers are added to the polymer chain, the HONO decreases, while increasing the LUNO. Both the HONO and LUNO reaches to the saturation (indicated with the solid black lines) for a larger repeat unit, indicating the bond dissociation limit.

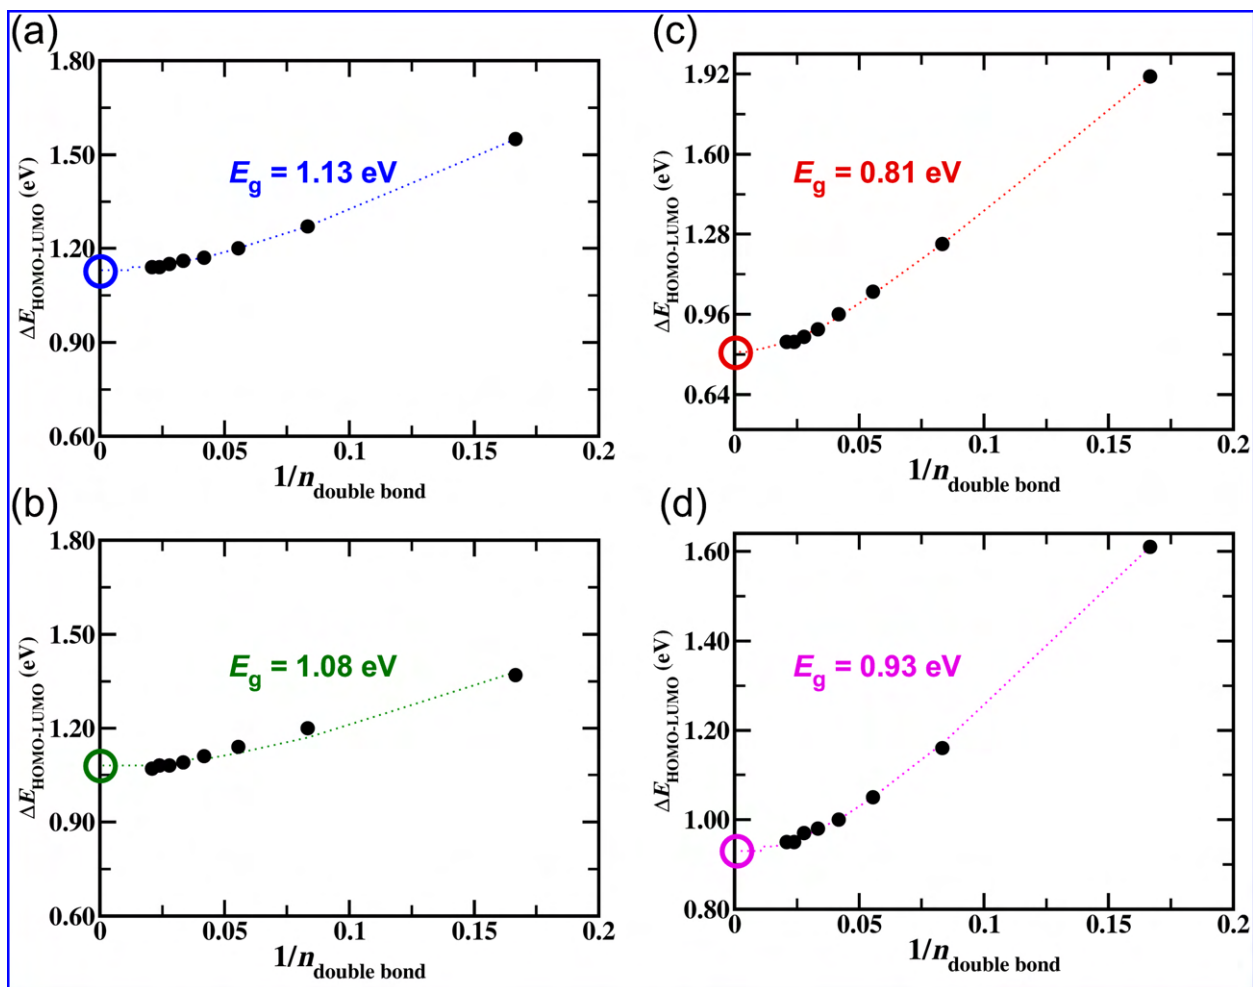

Figure S56: Calculated HOMO–LUMO energy gaps as a function of double bonds ( $n$ ) of (a) CPDS-CBBT, (b) CPDS-SiBBT, (c) CPDS-NBBT, and (d) CPDS-SeBBT polymers. The predicted electrochemical bandgap ( $E_g$ ) is obtained by extrapolation of the calculated HOMO–LUMO gaps to the polymer chain limit ( $n \rightarrow \infty$ ) using Kuhn model.<sup>1</sup> The calculated HOMO–LUMO gaps are indicated in black filled circles and extrapolated trend is shown in dashed lines.

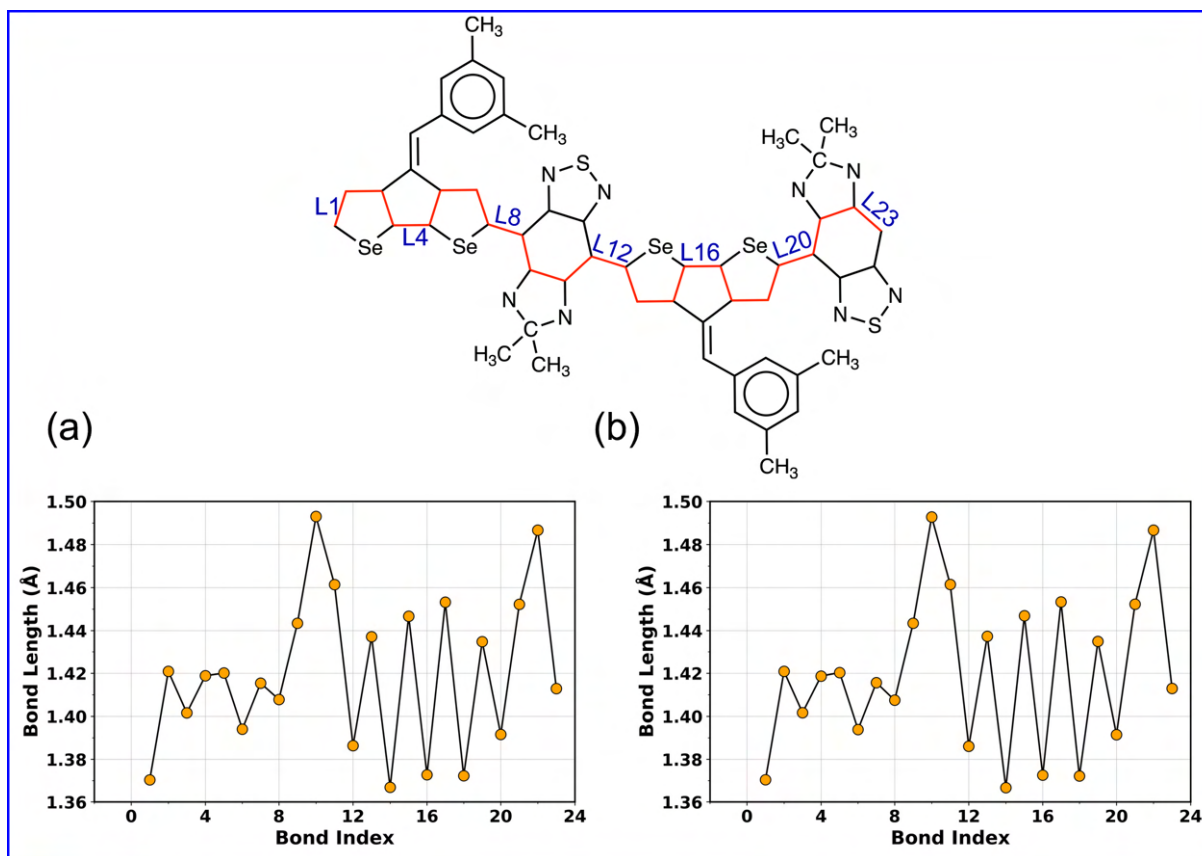

Figure S57: Calculated bond lengths (Å) of the CPDS-CBBT dimer ( $N = 2$ ) for (a) singlet ( $S = 0$ ) and (b) triplet states ( $S = 1$ ).

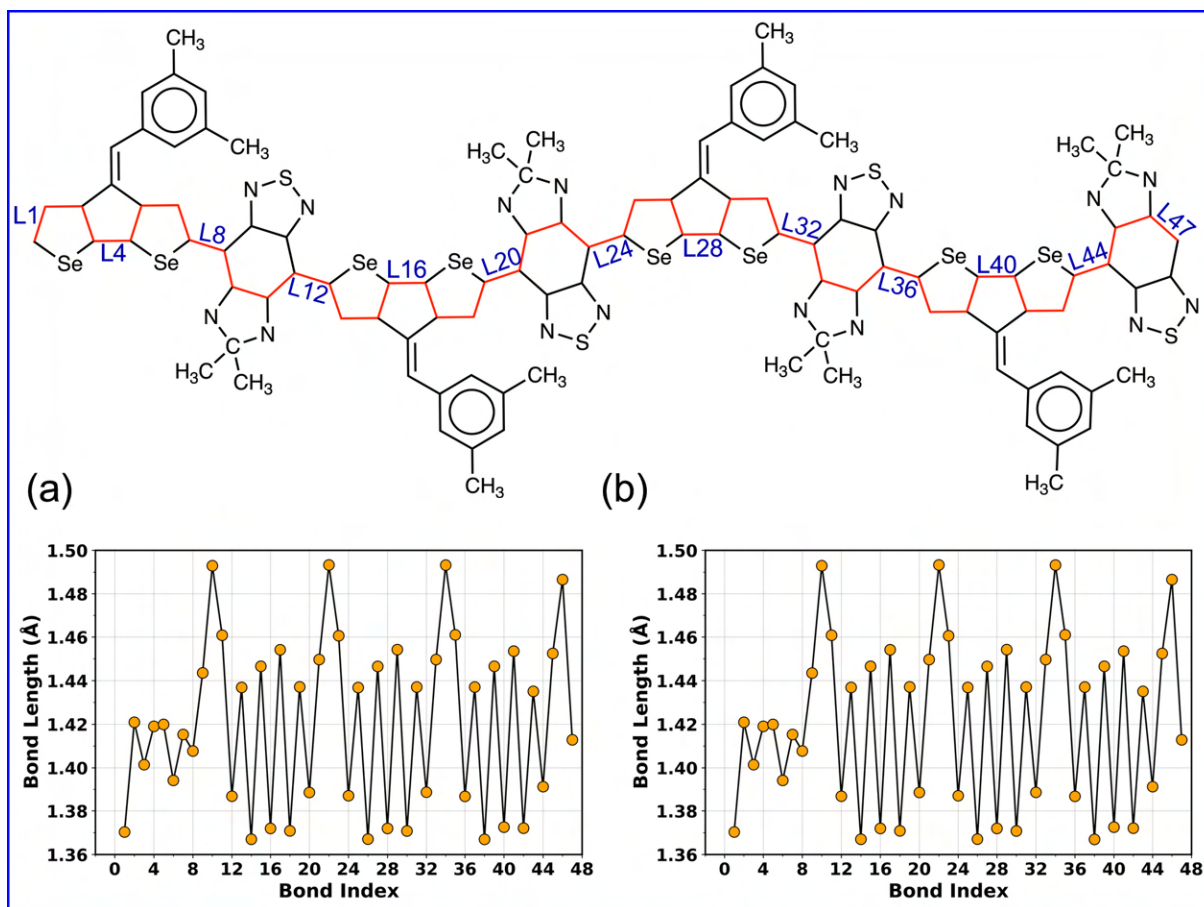

Figure S58: Calculated bond lengths (Å) of the CPDS-CBBT tetramer ( $N = 4$ ) for (a) singlet ( $S = 0$ ) and (b) triplet states ( $S = 1$ ).

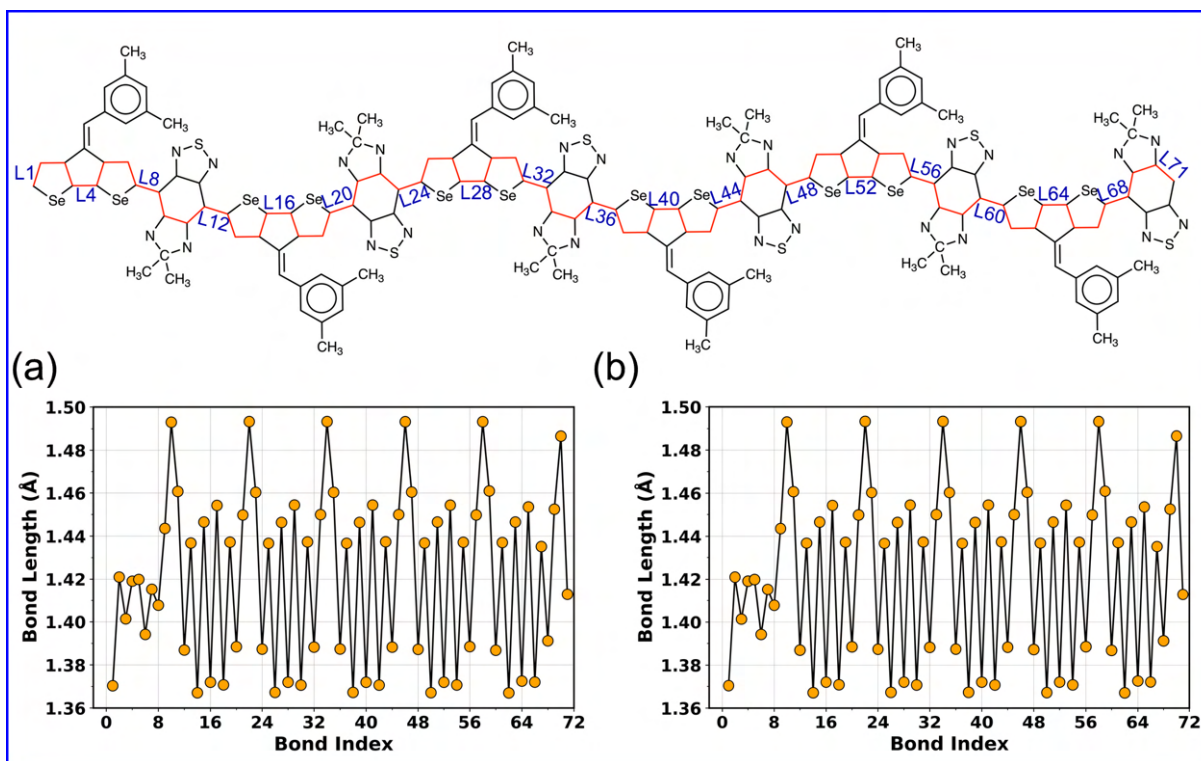

Figure S59: Calculated bond lengths (Å) of the CPDS-CBBT hexamer ( $N = 6$ ) for (a) singlet ( $S = 0$ ) and (b) triplet states ( $S = 1$ ).

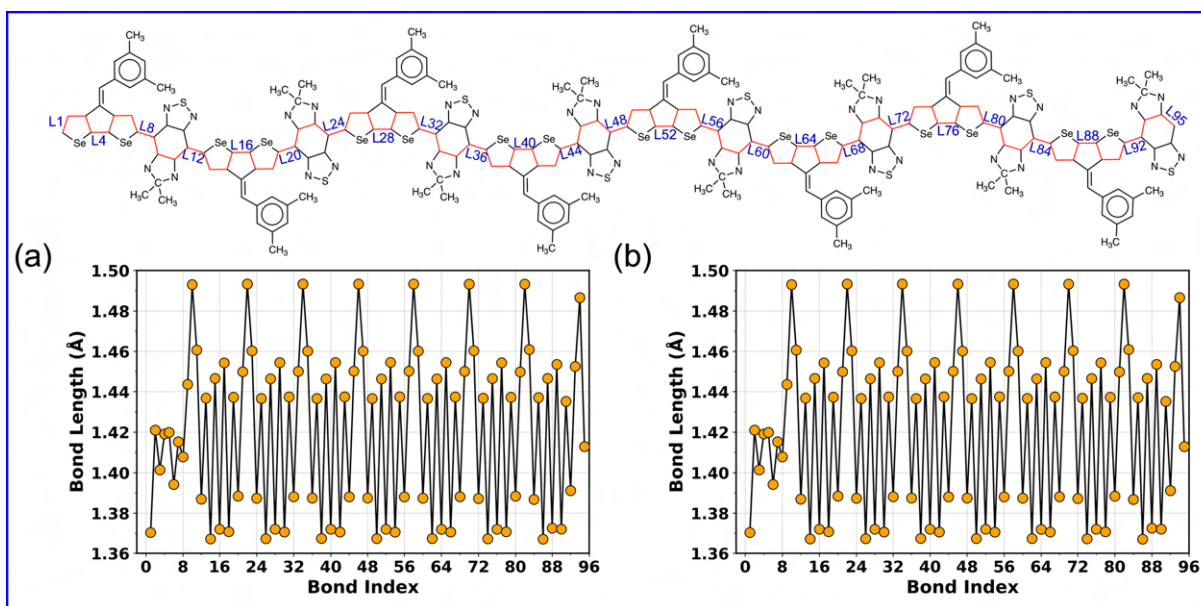

Figure S60: Calculated bond lengths (Å) of the CPDS-CBBT octamer ( $N = 8$ ) for (a) singlet ( $S = 0$ ) and (b) triplet states ( $S = 1$ ).

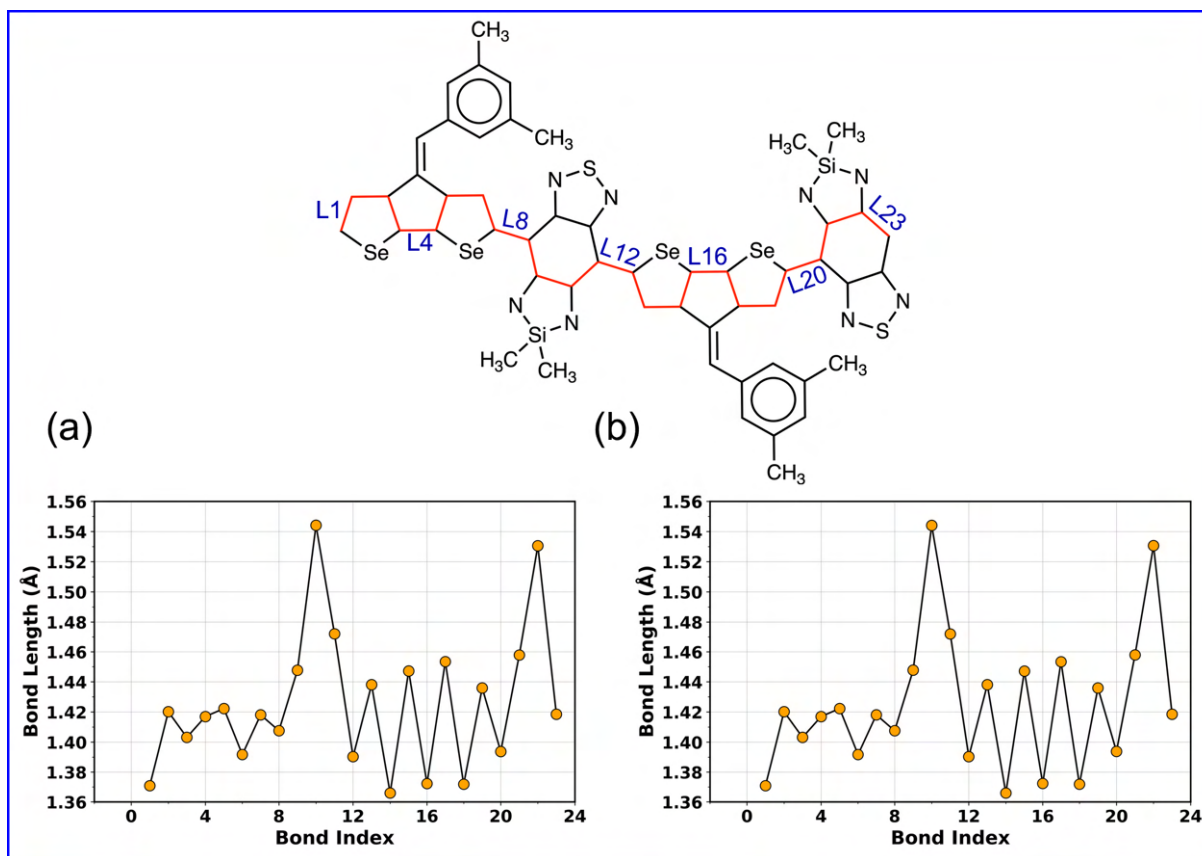

Figure S61: Calculated bond lengths (Å) of the CPDS-SiBBT dimer ( $N = 2$ ) for (a) singlet ( $S = 0$ ) and (b) triplet states ( $S = 1$ ).

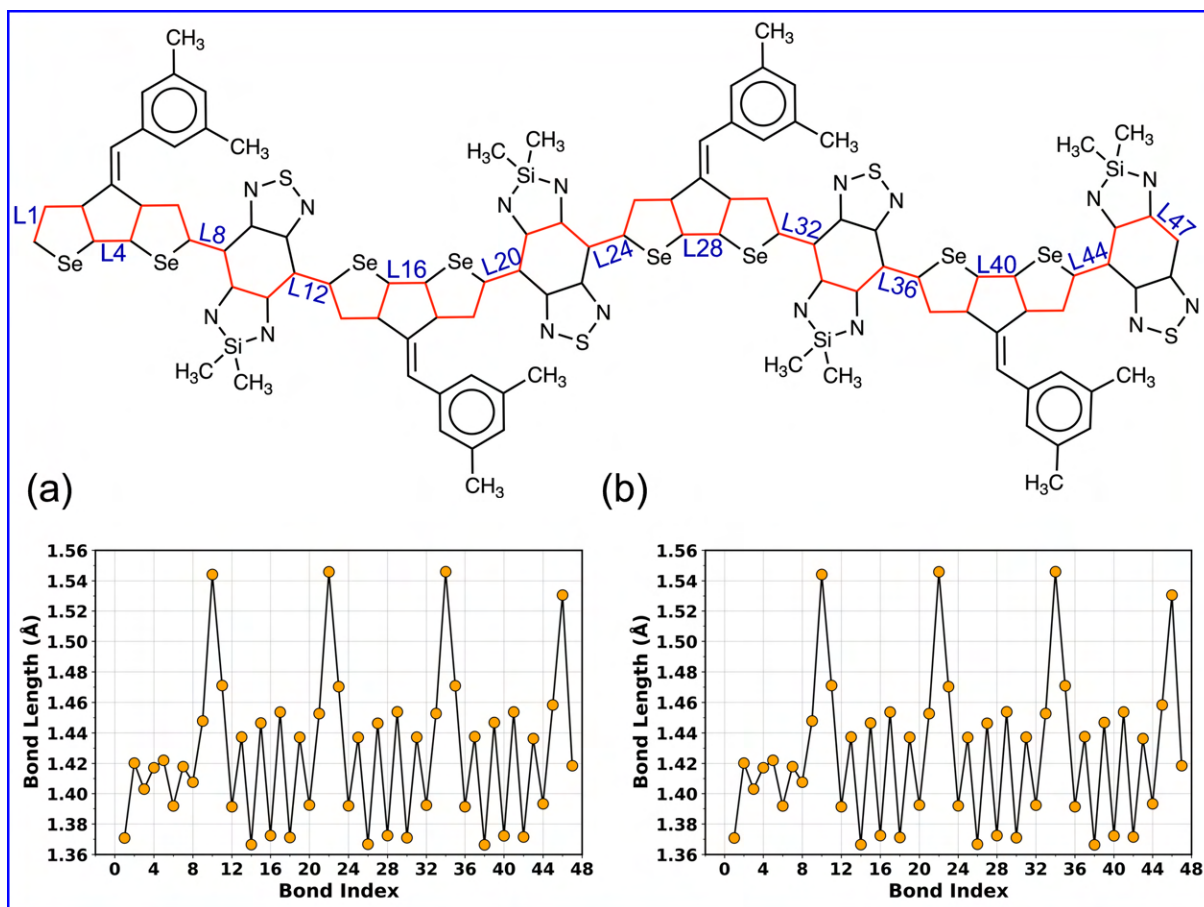

Figure S62: Calculated bond lengths (Å) of the CPDS-SiBBT tetramer ( $N = 4$ ) for (a) singlet ( $S = 0$ ) and (b) triplet states ( $S = 1$ ).



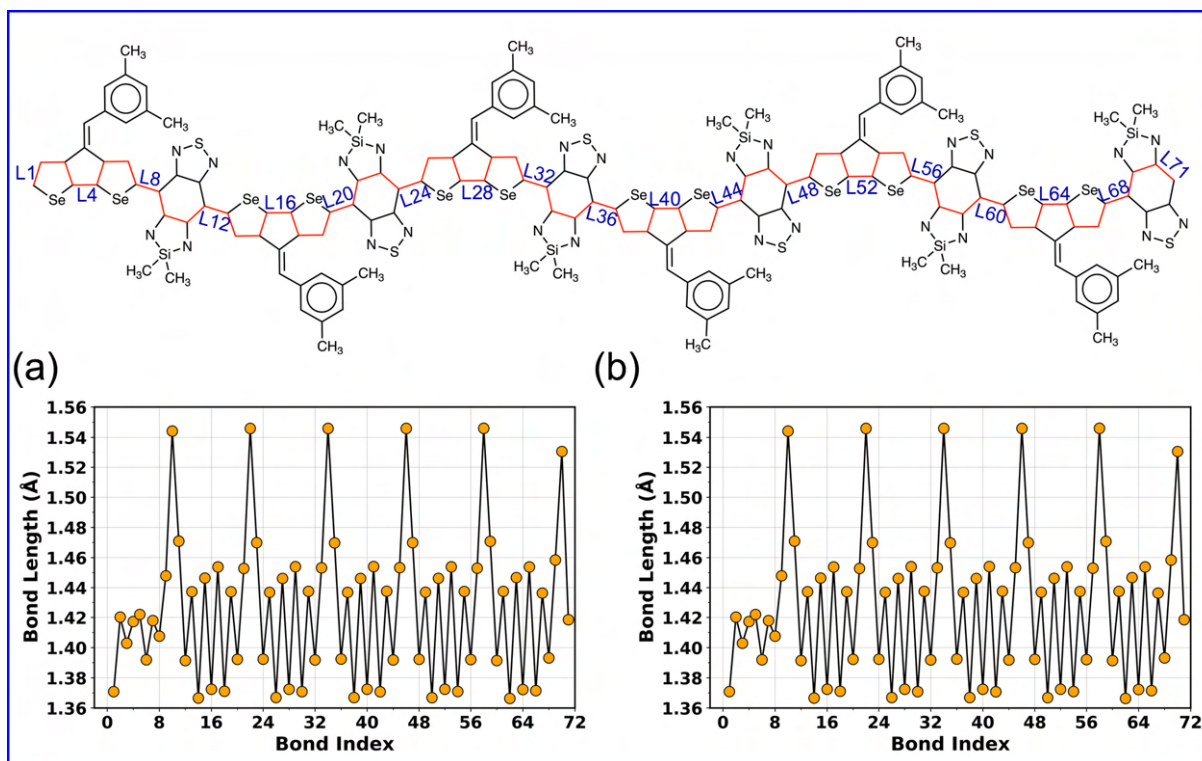

Figure S63: Calculated bond lengths (Å) of the CPDS-SiBBT hexamer ( $N = 6$ ) for (a) singlet ( $S = 0$ ) and (b) triplet states ( $S = 1$ ).

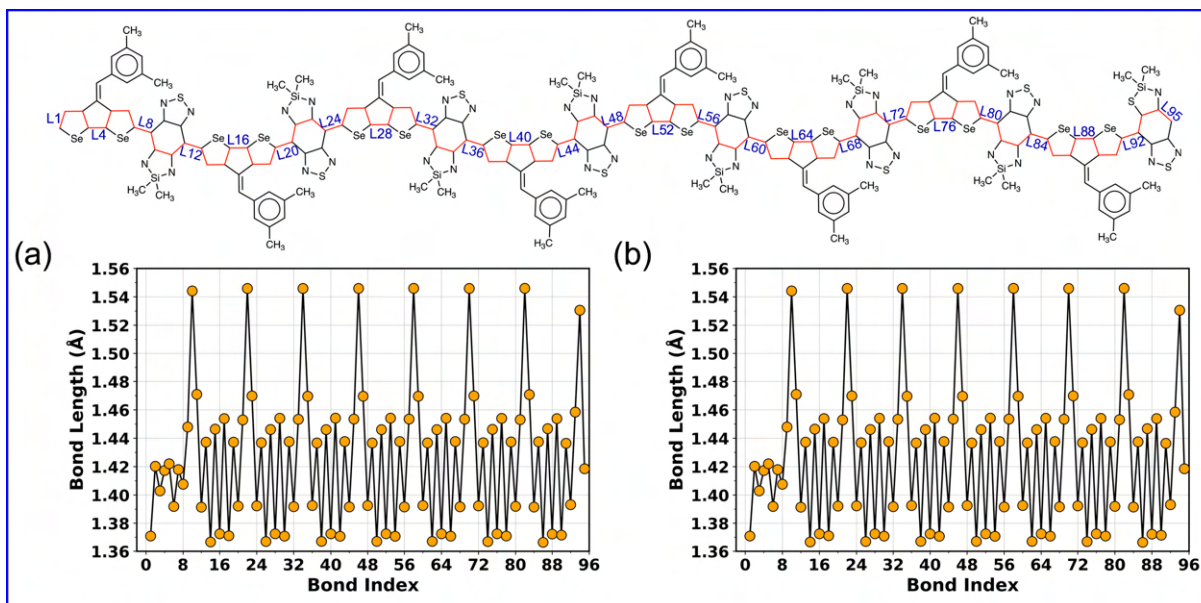

Figure S64: Calculated bond lengths ( $\text{\AA}$ ) of the CPDS-SiBBT octamer ( $N = 8$ ) for (a) singlet ( $S = 0$ ) and (b) triplet states ( $S = 1$ ).

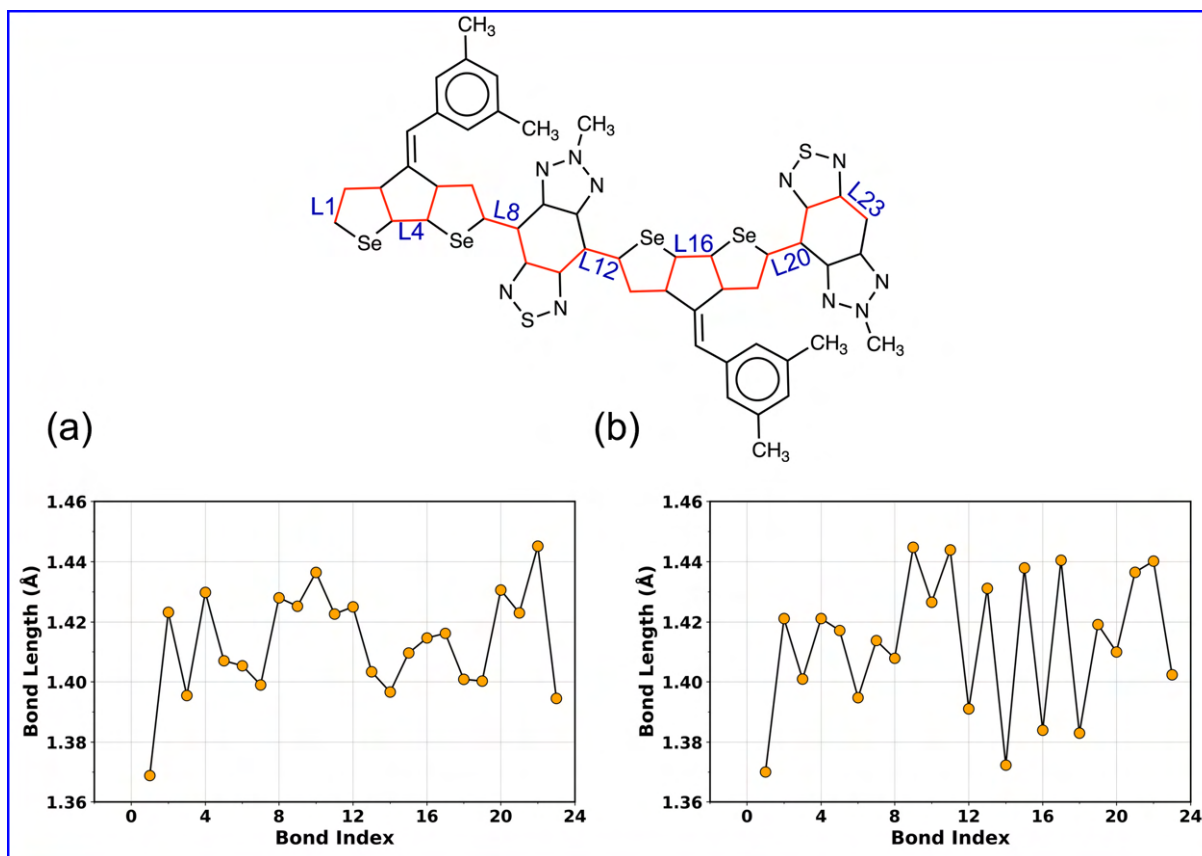

Figure S65: Calculated bond lengths (Å) of the CPDS-NBBT dimer ( $N = 2$ ) for (a) singlet ( $S = 0$ ) and (b) triplet states ( $S = 1$ ).

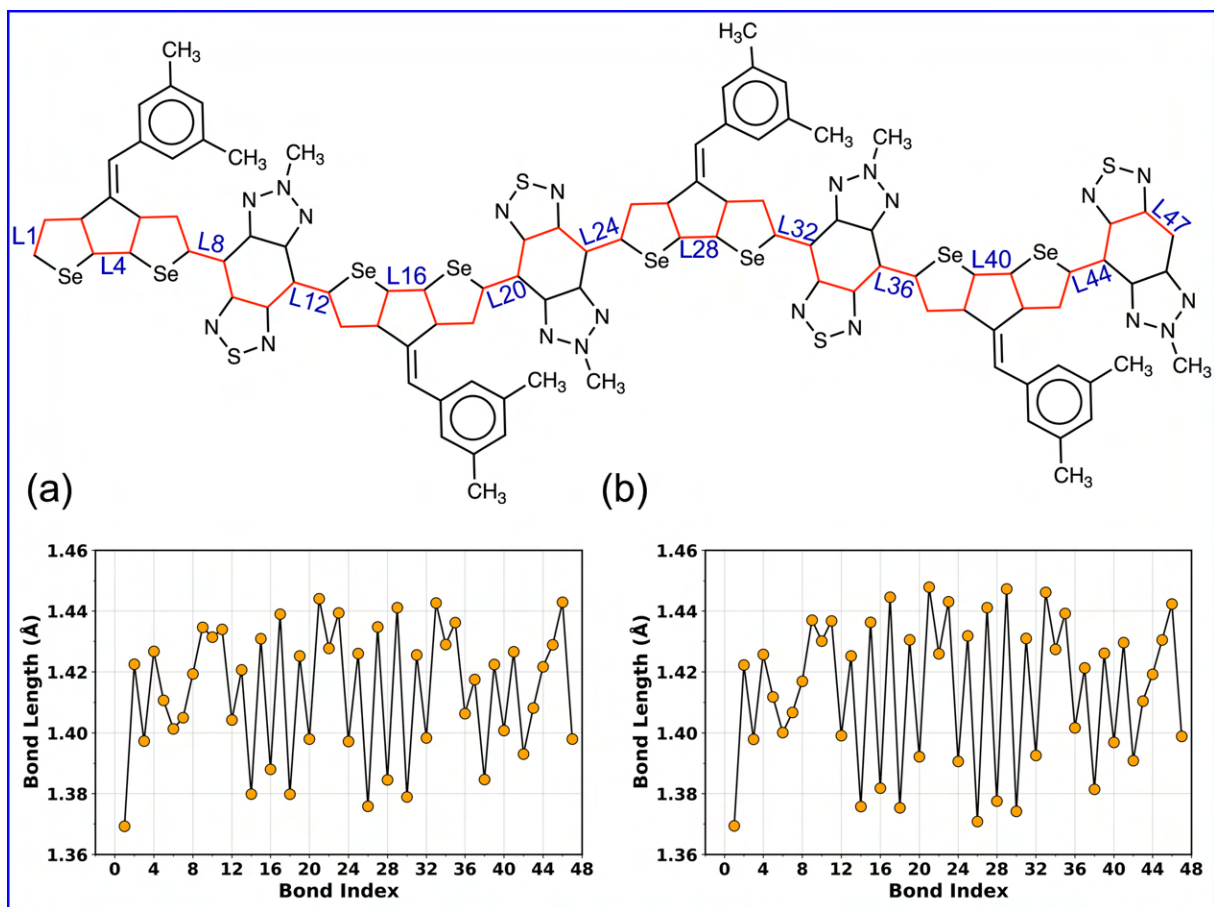

Figure S66: Calculated bond lengths (Å) of the CPDS-NBBT tetramer ( $N = 4$ ) for (a) singlet ( $S = 0$ ) and (b) triplet states ( $S = 1$ ).

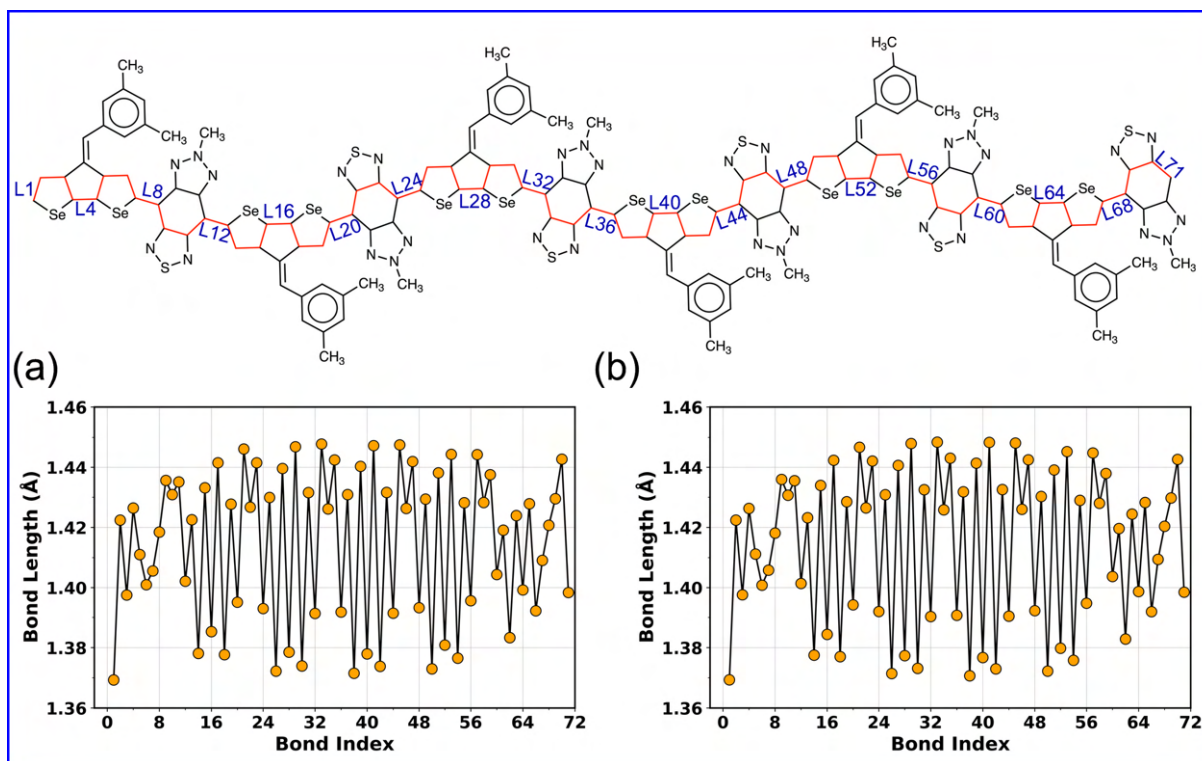

Figure S67: Calculated bond lengths (Å) of the CPDS-NBBT hexamer ( $N = 6$ ) for (a) singlet ( $S = 0$ ) and (b) triplet states ( $S = 1$ ).

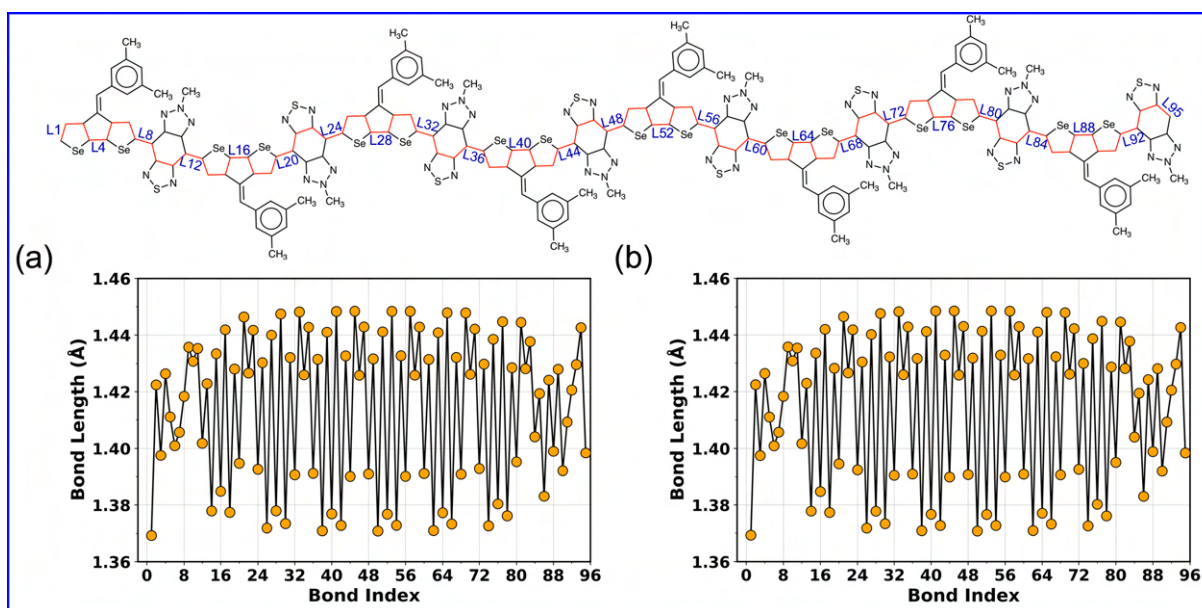

Figure S68: Calculated bond lengths (Å) of the CPDS-NBBT octamer ( $N = 8$ ) for (a) singlet ( $S = 0$ ) and (b) triplet states ( $S = 1$ ).

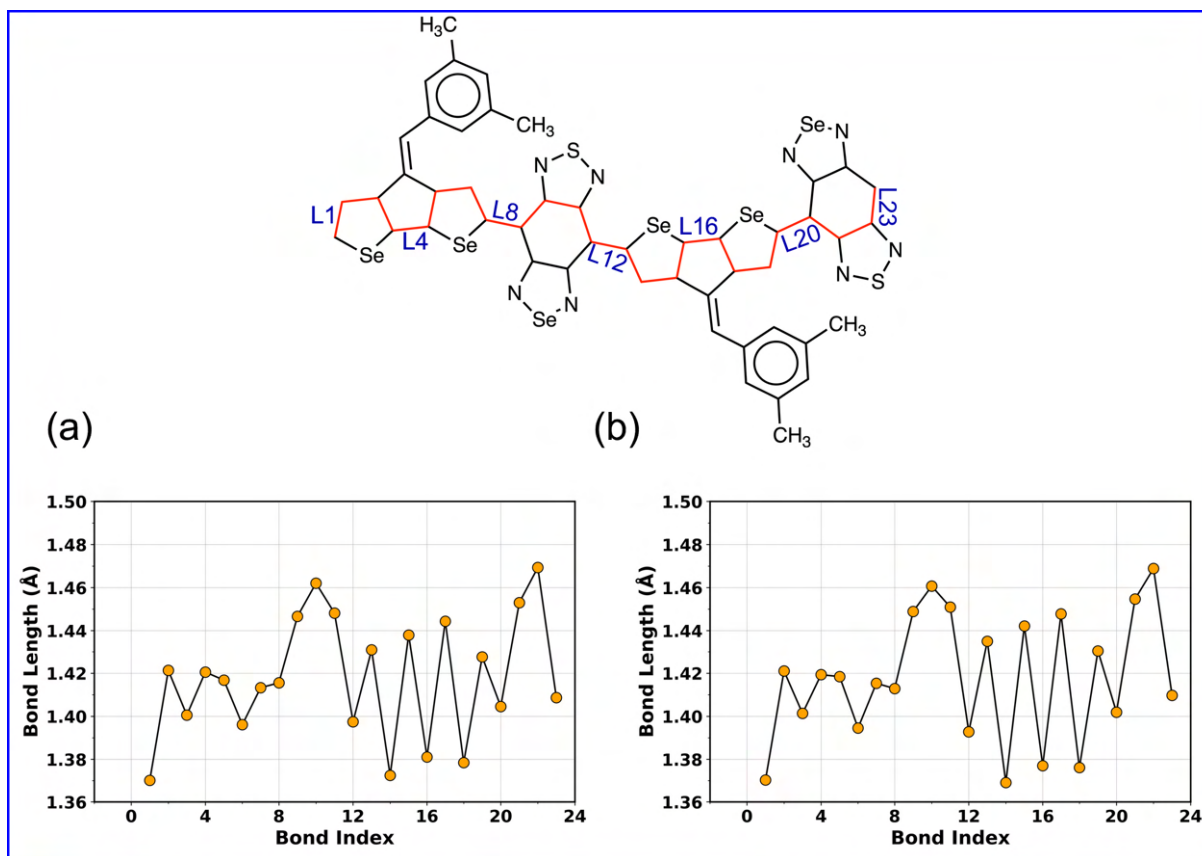

Figure S69: Calculated bond lengths (Å) of the CPDS-SeBBT dimer ( $N = 2$ ) for (a) singlet ( $S = 0$ ) and (b) triplet states ( $S = 1$ ).

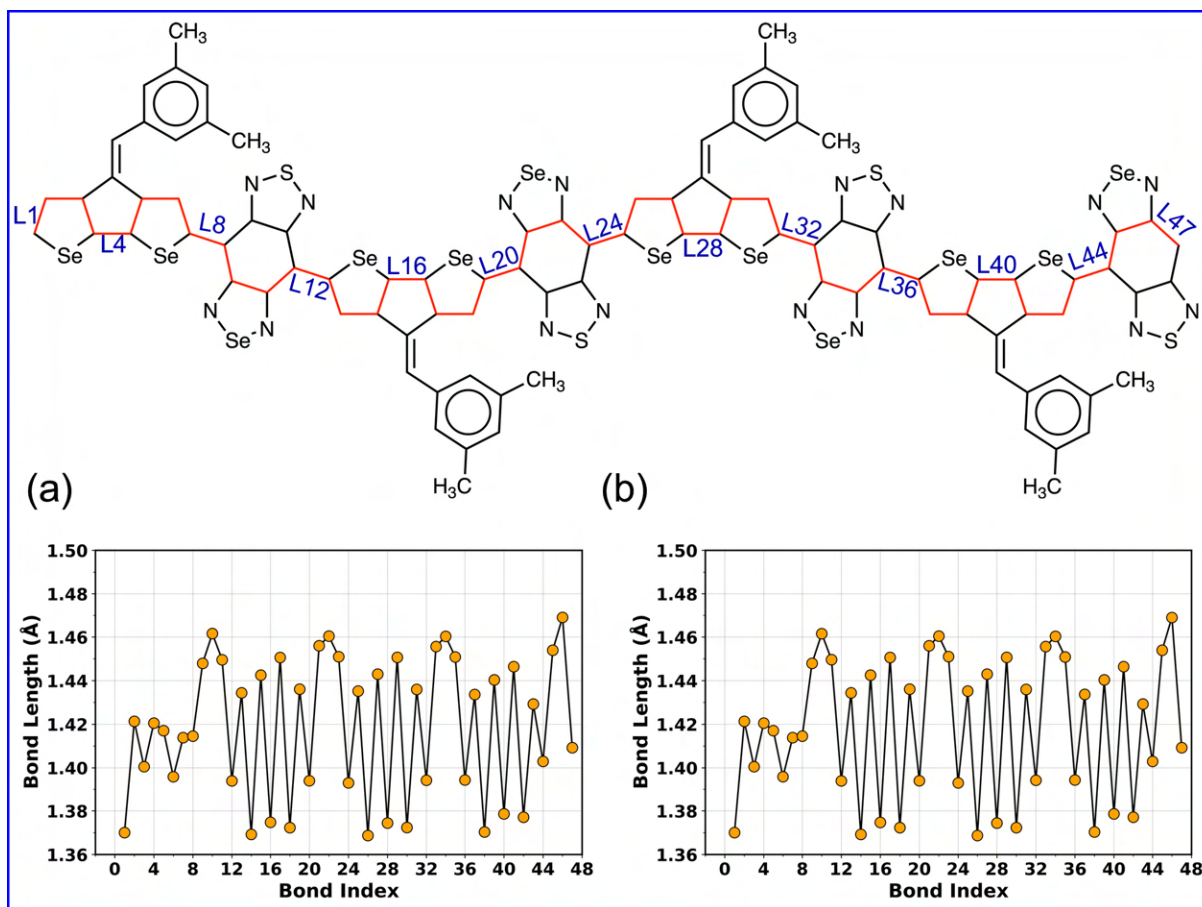

Figure S70: Calculated bond lengths (Å) of the CPDS-SeBBT tetramer ( $N = 4$ ) for (a) singlet ( $S = 0$ ) and (b) triplet states ( $S = 1$ ).

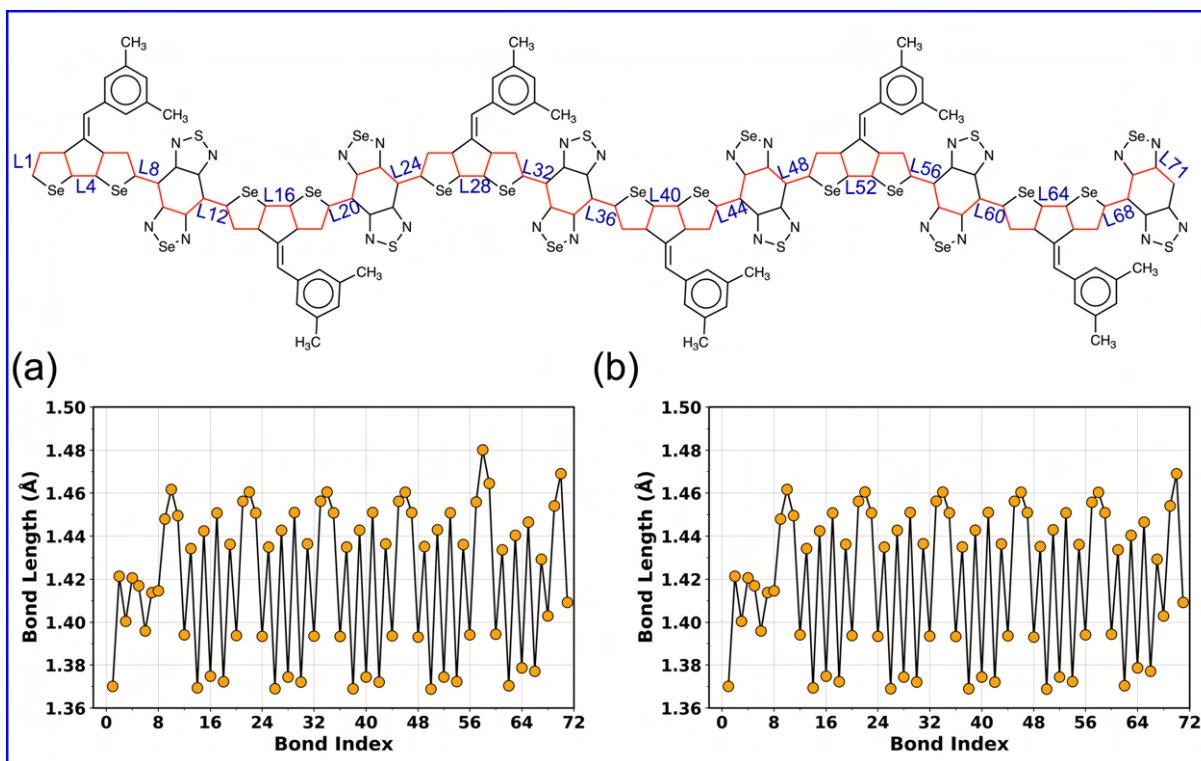

Figure S71: Calculated bond lengths (Å) of the CPDS-SeBBT hexamer ( $N = 6$ ) for (a) singlet ( $S = 0$ ) and (b) triplet states ( $S = 1$ ).

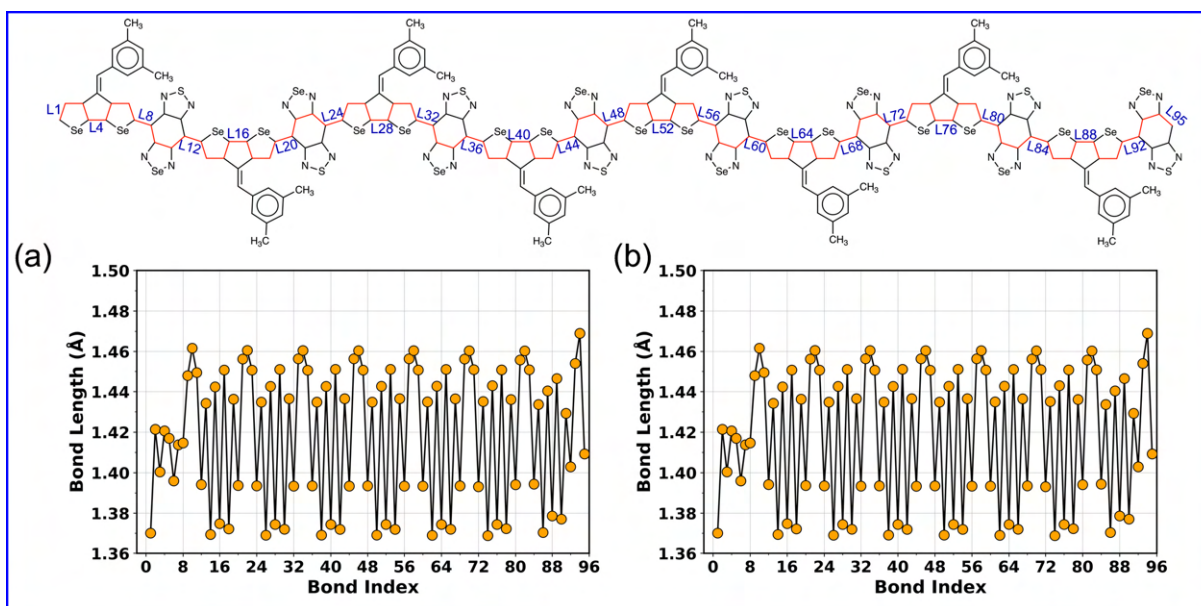

Figure S72: Calculated bond lengths (Å) of the CPDS-SeBBT octamer ( $N = 8$ ) for (a) singlet ( $S = 0$ ) and (b) triplet states ( $S = 1$ ).



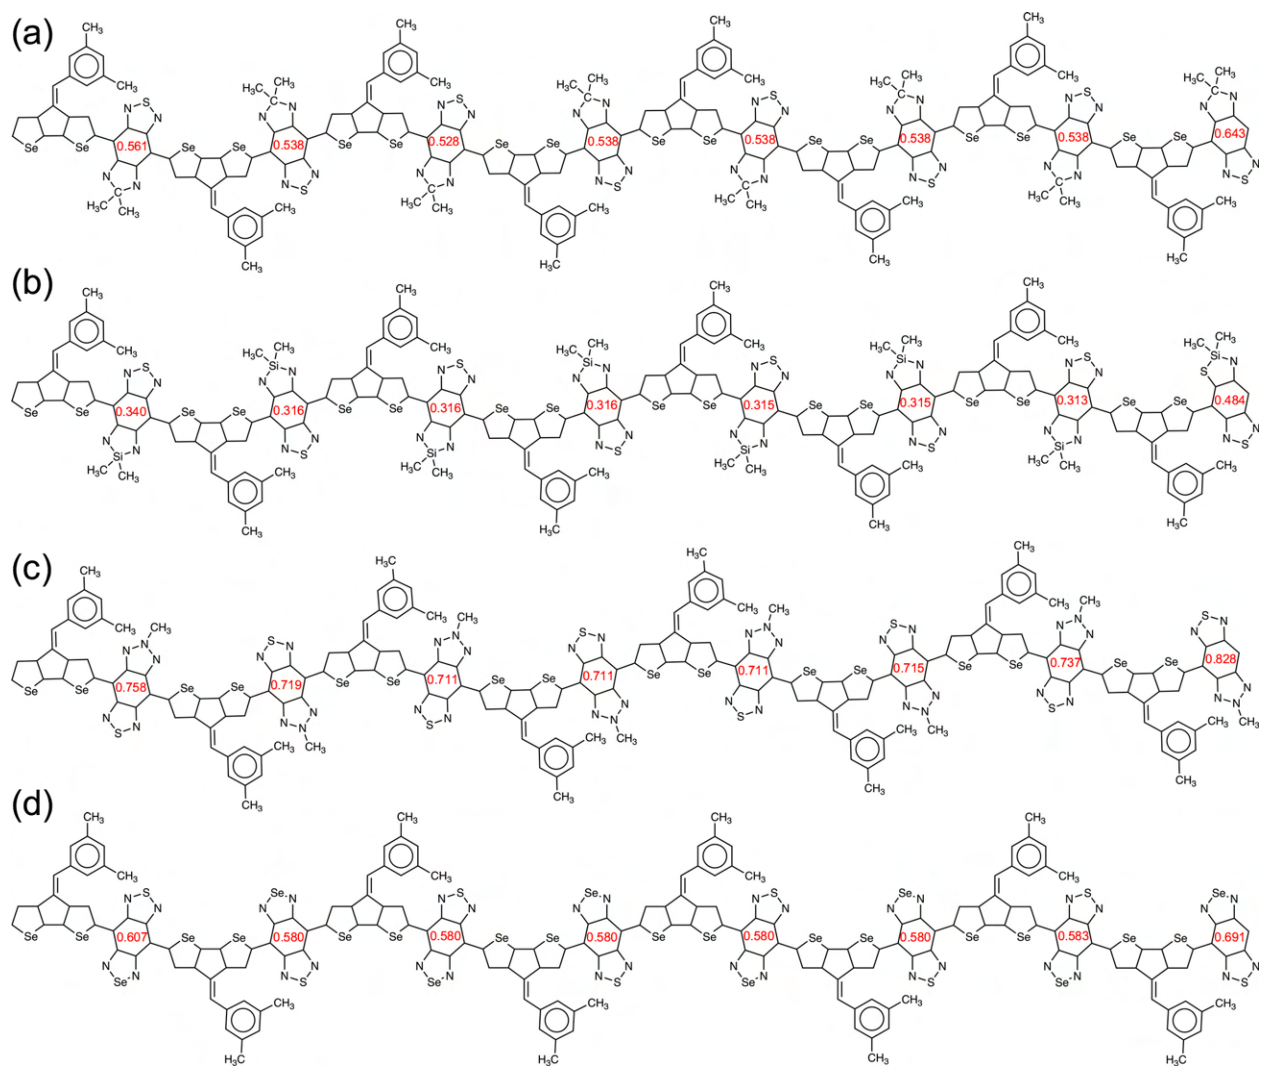

Figure S73: Calculated HOMA values for the octamer ( $N = 8$ ) of (a) CPDS-CBBT, (b) CPDS-SiBBT, (c) CPDS-NBBT, and (d) CPDS-SeBBT polymers in the singlet state.

## Literature Cited

- (1) Wykes, M.; Milián-Medina, B.; Gierschner, J. Computational engineering of low bandgap copolymers. *Front. in Chem.* **2013**, *1*, 35.
